# Supplementary material
Source: publisher figshare collection journal article supplement (https://acs.figshare.com/ndownloader/files/5694381)
Supplement: Supplementary file 1 [file 5694381]

# ic0204169.cif

Supporting Information for
High Nuclearity Ruthenium-Tin Clusters from the Reactions of
Triphenylstannane with Pentaruthenium Carbonyl Carbido Clusters.
Richard D. Adams*, Burjor Captain, Wei Fu and Mark D. Smith
Department of Chemistry and Biochemistry
University of South Carolina,
Columbia, SC 29208

CIF files for structural characterizations:
Compound 3
data_afc6s.xtl_master_file
_audit_creation_date                  '19100-05-12'
_audit_creation_method                'by teXsan v1.8'
_audit_update_record                  

Molecular Structure Corporation. (1992-1997). teXsan.
Single Crystal Structure Analysis Software. Version 1.7.
MSC, 3200 Research Forest Drive, The Woodlands, TX 77381, USA.

Walker, N. & Stuart. D. (1983). Acta Cryst. A39, 158-166.

Zachariasen, W. H. (1967). Acta Cryst. 23, 558-564.

Altomare, A., Cascarano, M.,
Giacovazzo, C., Guagliardi, A. (1993).
J. Appl. Cryst., 26, 343.
;
_publ_section_acknowledgements
_computing_data_collection            'MSC/AFC Diffractometer Control'
_computing_cell_refinement            'MSC/AFC Diffractometer Control'
_computing_data_reduction             'teXsan (MSC, 1992-1997)'
_computing_structure_solution         
;
SIR92 (Altomare, et. al. 1993)
;
_computing_structure_refinement       'teXsan (MSC, 1992-1997)'
_computing_publication_material       'teXsan (MSC, 1992-1997)'

_cell_length_a                         18.0399(9)
_cell_length_b                         9.1570(9)
_cell_length_c                         24.528(3)
_cell_angle_alpha                      90.233(9)
_cell_angle_beta                       93.079(8)
_cell_angle_gamma                      89.813(8)
_cell_volume                           4046.0(6)
_cell_formula_units_Z                  2
_cell_measurement_temperature          296.2
_cell_measurement_reflns_used          24
_cell_measurement_theta_min            2.1
_cell_measurement_theta_max            5.7
_symmetry_cell_setting                 triclinic
_symmetry_space_group_name_H-M        'P -1       '
_symmetry_Int_Tables_number            2
_symmetry_space_group_name_Hall        ?
loop_
_symmetry_equiv_pos_as_xyz
   '   +x,   +y,   +z'
   '   -x,   -y,   -z'
_publ_section_exptl_prep
;
     ENTER EXPERIMENTAL SECTION
;
_exptl_crystal_description            '----------'
_exptl_crystal_colour                 '--------------------'
_exptl_crystal_size_max                0.00
_exptl_crystal_size_mid                0.00
_exptl_crystal_size_min                0.00
_exptl_crystal_density_diffrn          2.115
_exptl_crystal_density_meas            'not measured'
_chemical_formula_weight               2577.06
_chemical_formula_analytical           ?
_chemical_formula_sum                  'C68 H32 O30 Ru10 Sn2 '
_chemical_formula_moiety               '?'
_chemical_formula_structural           ?
_chemical_compound_source              ?
_exptl_crystal_F_000                   2440.00
_exptl_absorpt_coefficient_mu          2.492
_exptl_absorpt_correction_type        
;
\DF (DIFABS; Walker & Stuart, 1983)
;
_exptl_absorpt_correction_T_max        1.000
_exptl_absorpt_correction_T_min        0.570
_exptl_special_details
;
The scan width was (1.70+0.35tan\q)\% with an \w
scan speed of 8\% per minute
(up to 3 scans to achieve I/\s(I) > 10).
Stationary background counts were recorded at each end of the
scan, and the scan time:background time ratio was 2:1.
;

_diffrn_special_details
;
  ?
;
_diffrn_ambient_temperature            296.2
_diffrn_radiation_wavelength           0.7107
_diffrn_radiation_type                 'Mo K\a'
_diffrn_radiation_source              'X-ray tube'
_diffrn_radiation_monochromator        graphite
_diffrn_radiation_detector            'scintillation counter'
_diffrn_measurement_device_type       'Rigaku AFC6S'
_diffrn_measurement_method            \w-2\q

_diffrn_standards_number              3
_diffrn_standards_interval_count      150
_diffrn_standards_decay_%             1.05
loop_
_diffrn_standard_refln_index_h
_diffrn_standard_refln_index_k
_diffrn_standard_refln_index_l
       1      -1      0
       1       1      1
       2       0      1
_diffrn_reflns_number                  10294
_reflns_number_total                   9902
_reflns_number_gt                      7798
_reflns_threshold_expression            I>3.00\s(I)
_diffrn_reflns_av_R_equivalents        0.03164
_diffrn_reflns_av_sigmaI/netI          0.040
_diffrn_reflns_limit_h_min             0
_diffrn_reflns_limit_h_max             18
_diffrn_reflns_limit_k_min             -9
_diffrn_reflns_limit_k_max             9
_diffrn_reflns_limit_l_min             -25
_diffrn_reflns_limit_l_max             25
_diffrn_reflns_theta_min               0.83
_diffrn_reflns_theta_max               22.05
_diffrn_reflns_reduction_process      'Lp corrections applied'
_diffrn_orient_matrix_UB_11            0.05265
_diffrn_orient_matrix_UB_12            0.01988
_diffrn_orient_matrix_UB_13           -0.00859
_diffrn_orient_matrix_UB_21           -0.01691
_diffrn_orient_matrix_UB_22            0.03046
_diffrn_orient_matrix_UB_23           -0.03782
_diffrn_orient_matrix_UB_31           -0.00551
_diffrn_orient_matrix_UB_32            0.10308
_diffrn_orient_matrix_UB_33            0.01285
loop_
_atom_type_symbol
_atom_type_oxidation_number
_atom_type_number_in_cell
_atom_type_scat_dispersion_real
_atom_type_scat_dispersion_imag
_atom_type_scat_source
   Ru 0    20 -1.420 0.836
;International Tables for Crystallography
(1992, Vol. C, Tables 4.2.6.8 and 6.1.1.1)
;
   Sn 0     4 -0.873 1.424
;International Tables for Crystallography
(1992, Vol. C, Tables 4.2.6.8 and 6.1.1.1)
;
   O  0    60 0.008 0.006
;International Tables for Crystallography
(1992, Vol. C, Tables 4.2.6.8 and 6.1.1.1)
;
   C  0   136 0.002 0.002
;International Tables for Crystallography
(1992, Vol. C, Tables 4.2.6.8 and 6.1.1.1)
;
   H  0    64 0.000 0.000
;International Tables for Crystallography
(1992, Vol. C, Table 6.1.1.2)
;

loop_
_atom_site_label
_atom_site_fract_x
_atom_site_fract_y
_atom_site_fract_z
_atom_site_U_iso_or_equiv
_atom_site_occupancy
_atom_site_refinement_flags
_atom_site_adp_type
_atom_site_calc_flag
_atom_site_calc_attached_atom
Sn(1) 0.61000(3) 0.69435(7) 0.64546(2) 0.0443(2) 1.000 . Uani d ?
Sn(2) 1.11051(3) 0.16716(7) 0.65430(2) 0.0446(2) 1.000 . Uani d ?
Ru(1) 0.63459(4) 0.61366(8) 0.75162(3) 0.0427(2) 1.000 . Uani d ?
Ru(2) 0.50984(4) 0.75937(8) 0.80517(3) 0.0424(2) 1.000 . Uani d ?
Ru(3) 0.60699(4) 0.76776(8) 0.90169(3) 0.0464(2) 1.000 . Uani d ?
Ru(4) 0.51548(4) 0.52188(8) 0.87960(3) 0.0449(2) 1.000 . Uani d ?
Ru(5) 0.67083(4) 0.50513(8) 0.86311(3) 0.0462(2) 1.000 . Uani d ?
Ru(6) 1.13901(4) 0.11700(8) 0.76222(3) 0.0427(2) 1.000 . Uani d ?
Ru(7) 0.99477(4) 0.18185(8) 0.81265(3) 0.0442(2) 1.000 . Uani d ?
Ru(8) 1.08537(4) 0.26987(8) 0.90736(3) 0.0434(2) 1.000 . Uani d ?
Ru(9) 1.03988(4) -0.02681(8) 0.89384(3) 0.0449(2) 1.000 . Uani d ?
Ru(10) 1.18872(4) 0.05441(8) 0.87562(3) 0.0414(2) 1.000 . Uani d ?
O(11) 0.7220(5) 0.8995(9) 0.7569(3) 0.092(3) 1.000 . Uani d ?
O(12) 0.5287(5) 0.3736(9) 0.7100(3) 0.090(3) 1.000 . Uani d ?
O(13) 0.7684(5) 0.448(1) 0.7168(4) 0.110(4) 1.000 . Uani d ?
O(21) 0.3941(4) 0.9299(9) 0.8654(4) 0.096(3) 1.000 . Uani d ?
O(22) 0.5498(5) 1.0326(9) 0.7412(4) 0.094(3) 1.000 . Uani d ?
O(23) 0.3888(5) 0.615(1) 0.7334(4) 0.106(4) 1.000 . Uani d ?
O(31) 0.7405(5) 0.947(1) 0.8737(4) 0.116(4) 1.000 . Uani d ?
O(32) 0.5250(7) 1.039(1) 0.9369(5) 0.174(6) 1.000 . Uani d ?
O(33) 0.6679(5) 0.704(1) 1.0171(3) 0.100(3) 1.000 . Uani d ?
O(41) 0.3537(4) 0.5880(9) 0.9018(4) 0.088(3) 1.000 . Uani d ?
O(42) 0.5451(5) 0.3293(9) 0.9803(3) 0.089(3) 1.000 . Uani d ?
O(43) 0.4732(5) 0.255(1) 0.8103(4) 0.103(3) 1.000 . Uani d ?
O(51) 0.7205(5) 0.382(1) 0.9751(4) 0.104(4) 1.000 . Uani d ?
O(52) 0.8286(4) 0.607(1) 0.8442(4) 0.098(3) 1.000 . Uani d ?
O(53) 0.6781(5) 0.2074(9) 0.8086(4) 0.110(4) 1.000 . Uani d ?
O(61) 1.1672(5) 0.4454(9) 0.7575(3) 0.091(3) 1.000 . Uani d ?
O(62) 1.2949(4) 0.034(1) 0.7327(3) 0.090(3) 1.000 . Uani d ?
O(63) 1.0870(5) -0.1913(9) 0.7309(3) 0.095(3) 1.000 . Uani d ?
O(71) 0.8494(4) 0.245(1) 0.8678(4) 0.099(3) 1.000 . Uani d ?
O(72) 0.9765(5) 0.4662(9) 0.7463(3) 0.087(3) 1.000 . Uani d ?
O(73) 0.9170(5) -0.031(1) 0.7334(4) 0.104(3) 1.000 . Uani d ?
O(81) 0.9587(5) 0.472(1) 0.9369(4) 0.098(3) 1.000 . Uani d ?
O(82) 1.1702(5) 0.309(1) 1.0175(3) 0.089(3) 1.000 . Uani d ?
O(83) 1.1721(6) 0.532(1) 0.8720(4) 0.114(4) 1.000 . Uani d ?
O(91) 0.8825(5) -0.047(1) 0.9312(4) 0.123(4) 1.000 . Uani d ?
O(92) 1.1046(5) -0.222(1) 0.9845(4) 0.103(4) 1.000 . Uani d ?
O(93) 1.0180(6) -0.301(1) 0.8262(4) 0.122(4) 1.000 . Uani d ?
O(101) 1.3170(4) 0.2573(9) 0.8532(3) 0.083(3) 1.000 . Uani d ?
O(102) 1.2487(4) -0.2225(8) 0.8244(3) 0.077(3) 1.000 . Uani d ?
O(103) 1.2535(4) -0.0201(9) 0.9909(3) 0.081(3) 1.000 . Uani d ?
C(1) 0.5916(4) 0.6333(9) 0.8312(3) 0.040(2) 1.000 . Uani d ?
C(2) 1.0929(4) 0.1189(9) 0.8417(4) 0.042(3) 1.000 . Uani d ?
C(11) 0.6901(6) 0.794(1) 0.7573(4) 0.060(3) 1.000 . Uani d ?
C(12) 0.5675(6) 0.459(1) 0.7283(4) 0.055(3) 1.000 . Uani d ?
C(13) 0.7176(6) 0.513(1) 0.7280(4) 0.067(4) 1.000 . Uani d ?
C(21) 0.4361(5) 0.866(1) 0.8430(4) 0.063(3) 1.000 . Uani d ?
C(22) 0.5345(6) 0.931(1) 0.7635(4) 0.066(4) 1.000 . Uani d ?
C(23) 0.4356(6) 0.675(1) 0.7565(4) 0.066(4) 1.000 . Uani d ?
C(31) 0.6904(6) 0.881(1) 0.8822(4) 0.071(4) 1.000 . Uani d ?
C(32) 0.5537(7) 0.940(1) 0.9228(5) 0.089(5) 1.000 . Uani d ?
C(33) 0.6489(6) 0.728(1) 0.9734(5) 0.064(4) 1.000 . Uani d ?
C(41) 0.4129(6) 0.565(1) 0.8931(4) 0.059(3) 1.000 . Uani d ?
C(42) 0.5347(6) 0.401(1) 0.9424(5) 0.061(3) 1.000 . Uani d ?
C(43) 0.4902(6) 0.359(1) 0.8341(4) 0.062(3) 1.000 . Uani d ?
C(51) 0.7013(6) 0.429(1) 0.9343(5) 0.069(4) 1.000 . Uani d ?
C(52) 0.7705(6) 0.568(1) 0.8514(4) 0.064(4) 1.000 . Uani d ?
C(53) 0.6755(6) 0.317(1) 0.8293(5) 0.066(4) 1.000 . Uani d ?
C(61) 1.1585(6) 0.325(1) 0.7614(4) 0.058(3) 1.000 . Uani d ?
C(62) 1.2356(6) 0.067(1) 0.7417(4) 0.057(3) 1.000 . Uani d ?
C(63) 1.1038(6) -0.076(1) 0.7445(4) 0.056(3) 1.000 . Uani d ?
C(71) 0.9033(6) 0.223(1) 0.8479(4) 0.065(4) 1.000 . Uani d ?
C(72) 0.9839(5) 0.359(1) 0.7700(4) 0.061(3) 1.000 . Uani d ?
C(73) 0.9459(6) 0.054(1) 0.7615(5) 0.071(4) 1.000 . Uani d ?
C(81) 1.0025(6) 0.397(1) 0.9254(4) 0.063(3) 1.000 . Uani d ?
C(82) 1.1407(5) 0.293(1) 0.9762(4) 0.058(3) 1.000 . Uani d ?
C(83) 1.1393(6) 0.432(1) 0.8813(5) 0.066(4) 1.000 . Uani d ?
C(91) 0.9401(6) -0.039(1) 0.9152(5) 0.069(4) 1.000 . Uani d ?
C(92) 1.0832(6) -0.146(1) 0.9519(5) 0.068(4) 1.000 . Uani d ?
C(93) 1.0281(6) -0.193(1) 0.8484(5) 0.067(4) 1.000 . Uani d ?
C(101) 1.2702(5) 0.178(1) 0.8621(4) 0.055(3) 1.000 . Uani d ?
C(102) 1.2272(5) -0.119(1) 0.8443(4) 0.050(3) 1.000 . Uani d ?
C(103) 1.2280(5) 0.007(1) 0.9488(4) 0.056(3) 1.000 . Uani d ?
C(111) 0.7017(5) 0.810(1) 0.6114(4) 0.052(3) 1.000 . Uani d ?
C(112) 0.7739(6) 0.804(1) 0.6330(4) 0.061(3) 1.000 . Uani d ?
C(113) 0.8313(5) 0.868(1) 0.6058(5) 0.070(4) 1.000 . Uani d ?
C(114) 0.8160(6) 0.940(1) 0.5577(5) 0.070(4) 1.000 . Uani d ?
C(115) 0.7460(7) 0.945(1) 0.5346(5) 0.078(4) 1.000 . Uani d ?
C(116) 0.6878(5) 0.877(1) 0.5617(4) 0.062(3) 1.000 . Uani d ?
C(121) 0.6026(5) 0.499(1) 0.5951(4) 0.046(3) 1.000 . Uani d ?
C(122) 0.6658(6) 0.419(1) 0.5873(5) 0.088(5) 1.000 . Uani d ?
C(123) 0.6657(8) 0.297(2) 0.5559(6) 0.108(6) 1.000 . Uani d ?
C(124) 0.6025(8) 0.250(1) 0.5285(5) 0.078(4) 1.000 . Uani d ?
C(125) 0.5398(7) 0.329(1) 0.5344(5) 0.085(4) 1.000 . Uani d ?
C(126) 0.5404(6) 0.450(1) 0.5672(5) 0.079(4) 1.000 . Uani d ?
C(131) 0.5115(5) 0.823(1) 0.6275(4) 0.048(3) 1.000 . Uani d ?
C(132) 0.5142(6) 0.971(1) 0.6198(5) 0.076(4) 1.000 . Uani d ?
C(133) 0.4494(8) 1.054(1) 0.6107(6) 0.090(5) 1.000 . Uani d ?
C(134) 0.3837(7) 0.986(2) 0.6094(5) 0.086(5) 1.000 . Uani d ?
C(135) 0.3785(6) 0.843(2) 0.6166(5) 0.086(5) 1.000 . Uani d ?
C(136) 0.4430(6) 0.757(1) 0.6257(4) 0.063(3) 1.000 . Uani d ?
C(141) 1.1999(5) 0.287(1) 0.6189(4) 0.047(3) 1.000 . Uani d ?
C(142) 1.2640(6) 0.335(1) 0.6460(4) 0.066(4) 1.000 . Uani d ?
C(143) 1.3189(6) 0.403(1) 0.6174(5) 0.073(4) 1.000 . Uani d ?
C(144) 1.3108(6) 0.427(1) 0.5630(5) 0.073(4) 1.000 . Uani d ?
C(145) 1.2474(6) 0.381(1) 0.5350(4) 0.075(4) 1.000 . Uani d ?
C(146) 1.1914(5) 0.314(1) 0.5625(4) 0.061(3) 1.000 . Uani d ?
C(151) 1.1059(5) -0.032(1) 0.6063(4) 0.047(3) 1.000 . Uani d ?
C(152) 1.1636(6) -0.130(1) 0.6092(5) 0.080(4) 1.000 . Uani d ?
C(153) 1.1666(7) -0.249(1) 0.5767(6) 0.093(5) 1.000 . Uani d ?
C(154) 1.1086(8) -0.277(1) 0.5397(5) 0.079(4) 1.000 . Uani d ?
C(155) 1.0496(7) -0.182(1) 0.5351(4) 0.075(4) 1.000 . Uani d ?
C(156) 1.0486(6) -0.061(1) 0.5675(4) 0.065(3) 1.000 . Uani d ?
C(161) 1.0118(5) 0.292(1) 0.6321(4) 0.048(3) 1.000 . Uani d ?
C(162) 1.0164(6) 0.435(1) 0.6185(5) 0.070(4) 1.000 . Uani d ?
C(163) 0.9532(7) 0.519(1) 0.6051(6) 0.090(5) 1.000 . Uani d ?
C(164) 0.8863(7) 0.455(1) 0.6059(5) 0.081(4) 1.000 . Uani d ?
C(165) 0.8786(6) 0.313(1) 0.6183(5) 0.078(4) 1.000 . Uani d ?
C(166) 0.9422(6) 0.229(1) 0.6319(4) 0.058(3) 1.000 . Uani d ?
H(1) 0.535(4) 0.648(9) 0.923(3) 0.05(2) 1.000 . Uiso d ?
H(2) 1.048(3) 0.126(6) 0.937(2) 0.01(2) 1.000 . Uiso d ?
H(3) 0.8823 0.8585 0.6204 0.083 1.000 . Uiso c ?
H(4) 0.8556 0.9875 0.5393 0.079 1.000 . Uiso c ?
H(5) 0.7356 0.9950 0.5001 0.087 1.000 . Uiso c ?
H(6) 0.6374 0.8783 0.5452 0.075 1.000 . Uiso c ?
H(7) 0.7123 0.4527 0.6054 0.104 1.000 . Uiso c ?
H(8) 0.7121 0.2414 0.5524 0.125 1.000 . Uiso c ?
H(9) 0.6022 0.1635 0.5049 0.086 1.000 . Uiso c ?
H(10) 0.4934 0.2973 0.5158 0.102 1.000 . Uiso c ?
H(11) 0.4945 0.5054 0.5709 0.093 1.000 . Uiso c ?
H(12) 0.5623 1.0196 0.6214 0.087 1.000 . Uiso c ?
H(13) 0.4516 1.1601 0.6057 0.103 1.000 . Uiso c ?
H(14) 0.3383 1.0415 0.6027 0.098 1.000 . Uiso c ?
H(15) 0.3304 0.7960 0.6157 0.101 1.000 . Uiso c ?
H(16) 0.4394 0.6517 0.6313 0.072 1.000 . Uiso c ?
H(17) 1.2711 0.3233 0.6857 0.080 1.000 . Uiso c ?
H(18) 1.3642 0.4346 0.6374 0.086 1.000 . Uiso c ?
H(19) 1.3493 0.4752 0.5438 0.085 1.000 . Uiso c ?
H(20) 1.2411 0.3954 0.4958 0.087 1.000 . Uiso c ?
H(21) 1.1460 0.2839 0.5425 0.072 1.000 . Uiso c ?
H(22) 1.2044 -0.1129 0.6366 0.092 1.000 . Uiso c ?
H(23) 1.2093 -0.3141 0.5794 0.110 1.000 . Uiso c ?
H(24) 1.1080 -0.3637 0.5164 0.087 1.000 . Uiso c ?
H(25) 1.0080 -0.2014 0.5090 0.089 1.000 . Uiso c ?
H(26) 1.0075 0.0078 0.5636 0.077 1.000 . Uiso c ?
H(27) 1.0648 0.4799 0.6185 0.082 1.000 . Uiso c ?
H(28) 0.8418 0.5119 0.5968 0.094 1.000 . Uiso c ?
H(29) 0.8301 0.2676 0.6181 0.090 1.000 . Uiso c ?
H(30) 0.9374 0.1266 0.6420 0.068 1.000 . Uiso c ?
H(31) 0.9575 0.6208 0.5949 0.099 1.000 . Uiso c ?
H(32) 0.7849 0.7543 0.6677 0.073 1.000 . Uiso c ?

loop_
_atom_site_aniso_label
_atom_site_aniso_U_11
_atom_site_aniso_U_22
_atom_site_aniso_U_33
_atom_site_aniso_U_12
_atom_site_aniso_U_13
_atom_site_aniso_U_23
  Sn(1)  0.0445(4)   0.0437(4)   0.0448(4)   0.0004(3)   0.0045(3)   0.0027(3) 
  Sn(2)  0.0440(4)   0.0475(4)   0.0424(4)   -0.0023(3)  0.0039(3)   -0.0005(3)
  Ru(1)  0.0450(4)   0.0423(4)   0.0413(4)   0.0032(3)   0.0060(3)   -0.0007(3)
  Ru(2)  0.0415(4)   0.0416(4)   0.0437(5)   0.0058(3)   -0.0003(3)  -0.0030(3)
  Ru(3)  0.0530(5)   0.0420(4)   0.0433(5)   -0.0031(3)  -0.0046(3)  -0.0054(4)
  Ru(4)  0.0482(4)   0.0443(4)   0.0425(4)   -0.0065(3)  0.0069(3)   -0.0030(4)
  Ru(5)  0.0465(4)   0.0430(4)   0.0487(5)   0.0062(3)   -0.0009(3)  0.0048(4) 
  Ru(6)  0.0451(4)   0.0422(4)   0.0411(4)   -0.0004(3)  0.0054(3)   0.0008(3) 
  Ru(7)  0.0386(4)   0.0495(5)   0.0440(5)   0.0017(3)   -0.0009(3)  0.0008(4) 
  Ru(8)  0.0436(4)   0.0439(4)   0.0429(4)   -0.0008(3)  0.0042(3)   -0.0027(3)
  Ru(9)  0.0443(4)   0.0462(5)   0.0445(5)   -0.0076(3)  0.0044(3)   0.0038(4) 
  Ru(10) 0.0366(4)   0.0428(4)   0.0447(4)   0.0006(3)   0.0007(3)   0.0033(3) 
  O(11)  0.112(7)    0.075(6)    0.091(6)    -0.039(5)   0.024(5)    -0.014(5) 
  O(12)  0.124(7)    0.074(6)    0.075(6)    -0.043(5)   0.017(5)    -0.007(5) 
  O(13)  0.100(7)    0.141(9)    0.091(7)    0.060(6)    0.040(5)    0.010(6)  
  O(21)  0.072(5)    0.093(6)    0.123(8)    0.027(5)    0.027(5)    -0.023(6) 
  O(22)  0.138(8)    0.049(5)    0.099(7)    0.016(5)    0.030(6)    0.023(5)  
  O(23)  0.084(6)    0.142(9)    0.089(7)    -0.023(6)   -0.021(5)   -0.022(6) 
  O(31)  0.120(7)    0.126(8)    0.098(7)    -0.079(7)   -0.029(6)   0.026(6)  
  O(32)  0.19(1)     0.122(9)    0.21(1)     0.079(9)    -0.042(9)   -0.09(1)  
  O(33)  0.127(7)    0.120(8)    0.051(5)    -0.035(6)   -0.019(5)   0.006(5)  
  O(41)  0.054(5)    0.107(7)    0.105(7)    0.002(5)    0.014(4)    0.015(5)  
  O(42)  0.140(8)    0.072(6)    0.057(5)    -0.005(5)   0.011(5)    0.022(5)  
  O(43)  0.133(8)    0.082(6)    0.100(7)    -0.044(6)   0.054(6)    -0.034(5) 
  O(51)  0.123(7)    0.114(8)    0.074(6)    0.022(6)    -0.016(5)   0.035(6)  
  O(52)  0.049(5)    0.122(8)    0.122(8)    -0.004(5)   0.006(5)    0.024(6)  
  O(53)  0.133(8)    0.062(6)    0.129(8)    0.026(5)    -0.029(6)   -0.030(6) 
  O(61)  0.138(8)    0.047(5)    0.090(6)    -0.009(5)   0.027(5)    -0.002(4) 
  O(62)  0.055(5)    0.128(7)    0.088(6)    0.024(5)    0.021(4)    0.010(5)  
  O(63)  0.136(8)    0.058(5)    0.092(6)    -0.022(5)   0.019(5)    -0.011(5) 
  O(71)  0.047(5)    0.138(8)    0.116(7)    0.021(5)    0.030(5)    0.010(6)  
  O(72)  0.132(7)    0.056(5)    0.072(6)    0.020(5)    -0.004(5)   0.011(4)  
  O(73)  0.112(7)    0.103(7)    0.093(7)    -0.033(6)   -0.037(5)   -0.007(6) 
  O(81)  0.089(6)    0.104(7)    0.102(7)    0.044(5)    0.020(5)    -0.023(5) 
  O(82)  0.092(6)    0.109(7)    0.063(5)    0.002(5)    -0.018(5)   -0.015(5) 
  O(83)  0.156(9)    0.078(6)    0.110(8)    -0.057(6)   0.033(6)    -0.004(5) 
  O(91)  0.059(5)    0.17(1)     0.148(9)    -0.009(6)   0.025(6)    0.050(8)  
  O(92)  0.101(7)    0.108(7)    0.099(7)    -0.008(5)   -0.009(5)   0.050(6)  
  O(93)  0.21(1)     0.060(6)    0.100(7)    -0.035(6)   0.032(7)    -0.016(5) 
  O(101) 0.065(5)    0.091(6)    0.095(6)    -0.025(5)   0.011(4)    0.001(5)  
  O(102) 0.084(5)    0.049(5)    0.096(6)    0.016(4)    0.004(4)    0.004(4)  
  O(103) 0.090(6)    0.088(6)    0.062(5)    -0.002(4)   -0.017(4)   0.017(4)  
  C(1)   0.041(5)    0.033(5)    0.047(5)    0.005(4)    0.000(4)    -0.005(4) 
  C(2)   0.040(5)    0.036(5)    0.049(6)    -0.002(4)   0.000(4)    -0.004(4) 
  C(11)  0.065(7)    0.062(7)    0.055(7)    0.001(6)    0.019(5)    0.000(5)  
  C(12)  0.081(7)    0.033(5)    0.052(6)    -0.003(5)   0.016(5)    0.000(5)  
  C(13)  0.074(7)    0.075(8)    0.054(7)    0.020(6)    0.011(6)    0.007(6)  
  C(21)  0.050(6)    0.071(7)    0.068(7)    0.010(5)    0.000(5)    -0.016(6) 
  C(22)  0.088(8)    0.059(7)    0.051(7)    0.011(6)    0.006(6)    -0.015(6) 
  C(23)  0.063(7)    0.085(8)    0.050(7)    0.001(6)    -0.010(5)   -0.003(6) 
  C(31)  0.074(8)    0.071(8)    0.067(8)    -0.025(6)   -0.018(6)   -0.001(6) 
  C(32)  0.097(9)    0.059(7)    0.11(1)     0.013(7)    -0.025(7)   -0.039(7) 
  C(33)  0.067(7)    0.069(7)    0.057(7)    -0.011(5)   -0.008(6)   -0.005(6) 
  C(41)  0.061(7)    0.066(7)    0.051(6)    -0.009(5)   0.009(5)    0.000(5)  
  C(42)  0.070(7)    0.051(6)    0.063(7)    0.001(5)    0.018(6)    -0.008(6) 
  C(43)  0.069(7)    0.060(7)    0.061(7)    -0.021(6)   0.022(5)    -0.009(6) 
  C(51)  0.061(7)    0.078(8)    0.066(8)    0.007(6)    -0.004(6)   0.016(7)  
  C(52)  0.063(7)    0.064(7)    0.064(7)    0.013(6)    -0.010(6)   0.007(6)  
  C(53)  0.073(7)    0.054(7)    0.069(8)    0.023(6)    -0.003(6)   0.009(6)  
  C(61)  0.082(7)    0.043(6)    0.050(6)    0.000(5)    0.013(5)    0.003(5)  
  C(62)  0.062(7)    0.066(7)    0.045(6)    0.003(5)    0.006(5)    0.010(5)  
  C(63)  0.070(7)    0.041(6)    0.057(7)    0.008(5)    0.011(5)    0.002(5)  
  C(71)  0.051(7)    0.071(7)    0.071(8)    0.014(5)    -0.008(6)   0.006(6)  
  C(72)  0.061(6)    0.074(8)    0.048(6)    0.004(6)    -0.001(5)   -0.022(6) 
  C(73)  0.070(7)    0.081(8)    0.060(7)    -0.005(6)   -0.010(6)   -0.002(6) 
  C(81)  0.067(7)    0.075(8)    0.047(6)    0.011(6)    0.008(5)    -0.010(6) 
  C(82)  0.056(6)    0.062(7)    0.055(7)    0.002(5)    -0.001(5)   -0.011(5) 
  C(83)  0.081(8)    0.047(6)    0.072(8)    -0.008(6)   0.009(6)    -0.009(6) 
  C(91)  0.046(6)    0.082(8)    0.079(8)    -0.007(5)   0.006(6)    0.022(6)  
  C(92)  0.065(7)    0.074(8)    0.064(8)    -0.017(6)   0.003(6)    0.004(6)  
  C(93)  0.089(8)    0.042(6)    0.072(8)    -0.010(6)   0.007(6)    0.000(6)  
  C(101) 0.047(6)    0.061(6)    0.057(6)    -0.007(5)   0.004(5)    -0.009(5) 
  C(102) 0.060(6)    0.041(6)    0.049(6)    0.005(5)    0.005(5)    0.009(5)  
  C(103) 0.058(6)    0.056(6)    0.053(7)    -0.001(5)   0.000(5)    0.003(5)  
  C(111) 0.060(6)    0.043(5)    0.055(7)    -0.008(5)   0.014(5)    -0.004(5) 
  C(112) 0.061(7)    0.063(7)    0.059(7)    0.005(5)    0.003(5)    0.003(5)  
  C(113) 0.050(6)    0.077(8)    0.082(8)    -0.020(6)   0.010(6)    -0.007(7) 
  C(114) 0.062(7)    0.052(7)    0.10(1)     -0.010(5)   0.032(7)    0.002(6)  
  C(115) 0.096(9)    0.072(8)    0.068(8)    0.009(7)    0.038(7)    0.025(6)  
  C(116) 0.054(6)    0.065(7)    0.069(7)    -0.001(5)   0.007(5)    0.007(6)  
  C(121) 0.052(6)    0.047(5)    0.041(5)    -0.004(5)   0.007(4)    0.008(4)  
  C(122) 0.061(7)    0.10(1)     0.10(1)     0.005(7)    -0.016(7)   -0.017(8) 
  C(123) 0.11(1)     0.09(1)     0.13(1)     0.024(8)    0.00(1)     -0.05(1)  
  C(124) 0.13(1)     0.048(7)    0.057(7)    0.001(7)    0.004(7)    0.001(6)  
  C(125) 0.095(9)    0.084(9)    0.073(9)    0.003(8)    -0.013(7)   -0.018(7) 
  C(126) 0.066(7)    0.090(9)    0.080(8)    0.006(6)    -0.008(6)   -0.026(7) 
  C(131) 0.053(6)    0.047(6)    0.043(6)    0.007(5)    0.000(4)    0.003(4)  
  C(132) 0.072(7)    0.057(7)    0.100(9)    0.021(6)    0.028(7)    0.016(6)  
  C(133) 0.10(1)     0.071(8)    0.10(1)     0.027(8)    0.021(8)    0.027(7)  
  C(134) 0.080(9)    0.11(1)     0.069(8)    0.051(9)    -0.001(7)   0.005(8)  
  C(135) 0.057(7)    0.11(1)     0.09(1)     0.007(7)    -0.010(6)   -0.014(8) 
  C(136) 0.060(7)    0.057(7)    0.072(7)    0.012(5)    0.006(5)    0.002(5)  
  C(141) 0.051(6)    0.044(5)    0.045(6)    0.000(4)    0.005(4)    -0.007(4) 
  C(142) 0.068(7)    0.074(7)    0.055(7)    -0.014(6)   0.000(5)    0.004(6)  
  C(143) 0.061(7)    0.077(8)    0.081(9)    -0.026(6)   -0.001(6)   0.009(7)  
  C(144) 0.060(7)    0.078(8)    0.084(9)    -0.011(6)   0.025(6)    0.007(7)  
  C(145) 0.077(8)    0.093(9)    0.059(7)    -0.006(7)   0.031(6)    0.002(6)  
  C(146) 0.060(6)    0.061(7)    0.061(7)    0.000(5)    0.004(5)    -0.001(5) 
  C(151) 0.045(5)    0.053(6)    0.044(6)    -0.002(5)   0.008(4)    -0.003(5) 
  C(152) 0.059(7)    0.088(9)    0.093(9)    0.001(6)    -0.001(6)   -0.032(7) 
  C(153) 0.084(9)    0.09(1)     0.11(1)     0.008(7)    0.001(8)    -0.035(9) 
  C(154) 0.12(1)     0.049(7)    0.066(8)    -0.006(7)   0.021(7)    -0.011(6) 
  C(155) 0.105(9)    0.062(7)    0.058(7)    -0.014(7)   -0.012(6)   -0.003(6) 
  C(156) 0.074(7)    0.062(7)    0.057(7)    -0.005(6)   -0.007(6)   0.003(6)  
  C(161) 0.048(6)    0.057(6)    0.040(5)    -0.001(5)   0.004(4)    0.005(5)  
  C(162) 0.064(7)    0.057(7)    0.091(9)    0.004(6)    0.030(6)    0.010(6)  
  C(163) 0.083(9)    0.073(8)    0.12(1)     0.028(7)    0.035(8)    0.042(8)  
  C(164) 0.068(8)    0.09(1)     0.088(9)    0.028(7)    0.009(7)    0.018(7)  
  C(165) 0.057(7)    0.10(1)     0.073(8)    0.001(7)    -0.002(6)   0.006(7)  
  C(166) 0.068(7)    0.066(7)    0.040(6)    0.010(6)    0.000(5)    0.005(5)  

_refine_special_details
;
  ?
;
_refine_ls_structure_factor_coef       F
_refine_ls_matrix_type                 full
_refine_ls_weighting_scheme            'w = 1/[\s^2^(Fo) + 0.00090|Fo|^2^]'
_refine_ls_hydrogen_treatment          ?
_refine_ls_extinction_method           'Zachariasen (1967)'
_refine_ls_extinction_coef             0.00000007(1)
_refine_ls_extinction_expression       'equ(3) Acta Cryst.(1968) A24, p213.'
_refine_ls_abs_structure_details       ?
_refine_ls_abs_structure_Flack         ?
_refine_ls_number_reflns               7798
_refine_ls_number_parameters           1000
_refine_ls_number_restraints           0
_refine_ls_number_constraints          0
_refine_ls_R_factor_all                0.0296
_refine_ls_R_factor_gt                 0.0296
_refine_ls_wR_factor_all               0.0517
_refine_ls_wR_factor_ref               0.0517
_refine_ls_goodness_of_fit_all         1.351
_refine_ls_goodness_of_fit_ref         1.351
_refine_ls_shift/esd_max               0.0180
_refine_ls_shift/esd_mean              0.0000
_refine_diff_density_min               -0.52
_refine_diff_density_max               0.59

_geom_special_details
;
  ?
;
loop_
_geom_bond_atom_site_label_1
_geom_bond_atom_site_label_2
_geom_bond_distance
_geom_bond_site_symmetry_1
_geom_bond_site_symmetry_2
_geom_bond_publ_flag
        ?  ?    ?      ? ?  ?
# -- ENTER BONDS HERE, ONE PER LINE --
# e.g. C1 C2 1.541(1) . . yes

loop_
_geom_angle_atom_site_label_1
_geom_angle_atom_site_label_2
_geom_angle_atom_site_label_3
_geom_angle
_geom_angle_site_symmetry_1
_geom_angle_site_symmetry_2
_geom_angle_site_symmetry_3
_geom_angle_publ_flag
# -- ENTER ANGLES HERE, ONE PER LINE --
# e.g. C1 C2 C3 109.4(3) . . . yes
        ?  ?  ?     ?     ? ? ?  ?
loop_
_geom_contact_atom_site_label_1
_geom_contact_atom_site_label_2
_geom_contact_distance
_geom_contact_site_symmetry_1
_geom_contact_site_symmetry_2
_geom_contact_publ_flag
        ?  ?    ?      ? ?  ?
# -- ENTER NON-BONDED CONTACTS HERE, ONE PER LINE --
# e.g. O1 N1 2.841(1) . . yes

loop_
_geom_torsion_atom_site_label_1
_geom_torsion_atom_site_label_2
_geom_torsion_atom_site_label_3
_geom_torsion_atom_site_label_4
_geom_torsion_site_symmetry_1
_geom_torsion_site_symmetry_2
_geom_torsion_site_symmetry_3
_geom_torsion_site_symmetry_4
_geom_torsion
_geom_torsion_publ_flag
  Sn(1) Ru(1) Ru(2) Ru(3) . . . . -151.53(3) no
  Sn(1) Ru(1) Ru(2) Ru(4) . . . . 148.96(3) no
  Sn(1) Ru(1) Ru(2) C(1) . . . . 179.0(3) no
  Sn(1) Ru(1) Ru(2) C(21) . . . . -109(4) no
  Sn(1) Ru(1) Ru(2) C(22) . . . . -45.7(3) no
  Sn(1) Ru(1) Ru(2) C(23) . . . . 53.9(3) no
  Sn(1) Ru(1) Ru(5) Ru(3) . . . . 164.7(4) no
  Sn(1) Ru(1) Ru(5) Ru(4) . . . . -135.7(4) no
  Sn(1) Ru(1) Ru(5) C(1) . . . . -165.6(5) no
  Sn(1) Ru(1) Ru(5) C(51) . . . . 25(5) no
  Sn(1) Ru(1) Ru(5) C(52) . . . . 63.4(5) no
  Sn(1) Ru(1) Ru(5) C(53) . . . . -35.4(5) no
  Sn(1) Ru(1) C(1) Ru(2) . . . . -1.7(5) no
  Sn(1) Ru(1) C(1) Ru(3) . . . . -94.1(6) no
  Sn(1) Ru(1) C(1) Ru(4) . . . . 89.0(6) no
  Sn(1) Ru(1) C(1) Ru(5) . . . . 177.77(8) no
  Sn(1) Ru(1) C(11) O(11) . . . . -13.1(1) no
  Sn(1) Ru(1) C(12) O(12) . . . . 6(9) no
  Sn(1) Ru(1) C(13) O(13) . . . . -172.7(2) no
  Sn(1) C(111) C(112) C(113) . . . . 172.7(8) no
  Sn(1) C(111) C(116) C(115) . . . . -175.0(8) no
  Sn(1) C(121) C(122) C(123) . . . . -179(1) no
  Sn(1) C(121) C(126) C(125) . . . . 178(1) no
  Sn(1) C(131) C(132) C(133) . . . . -176.9(9) no
  Sn(1) C(131) C(136) C(135) . . . . 176.8(8) no
  Sn(2) Ru(6) Ru(7) Ru(8) . . . . -149.10(3) no
  Sn(2) Ru(6) Ru(7) Ru(9) . . . . 151.03(3) no
  Sn(2) Ru(6) Ru(7) C(2) . . . . -179.5(3) no
  Sn(2) Ru(6) Ru(7) C(71) . . . . -170(9) no
  Sn(2) Ru(6) Ru(7) C(72) . . . . -45.3(3) no
  Sn(2) Ru(6) Ru(7) C(73) . . . . 52.1(3) no
  Sn(2) Ru(6) Ru(10) Ru(8) . . . . 147.3(3) no
  Sn(2) Ru(6) Ru(10) Ru(9) . . . . -152.4(3) no
  Sn(2) Ru(6) Ru(10) C(2) . . . . 178.1(4) no
  Sn(2) Ru(6) Ru(10) C(101) . . . . 47.9(4) no
  Sn(2) Ru(6) Ru(10) C(102) . . . . -49.9(4) no
  Sn(2) Ru(6) Ru(10) C(103) . . . . -12(4) no
  Sn(2) Ru(6) C(2) Ru(7) . . . . 0.8(5) no
  Sn(2) Ru(6) C(2) Ru(8) . . . . -92.0(6) no
  Sn(2) Ru(6) C(2) Ru(9) . . . . 92.4(7) no
  Sn(2) Ru(6) C(2) Ru(10) . . . . -179.60(9) no
  Sn(2) Ru(6) C(61) O(61) . . . . 16.4(1) no
  Sn(2) Ru(6) C(62) O(62) . . . . -167.7(1) no
  Sn(2) Ru(6) C(63) O(63) . . . . 54.9(1) no
  Sn(2) C(141) C(142) C(143) . . . . 176.1(8) no
  Sn(2) C(141) C(146) C(145) . . . . -175.9(8) no
  Sn(2) C(151) C(152) C(153) . . . . -174(1) no
  Sn(2) C(151) C(156) C(155) . . . . 175.3(8) no
  Sn(2) C(161) C(162) C(163) . . . . -178.6(9) no
  Sn(2) C(161) C(166) C(165) . . . . 178.9(8) no
  Ru(1) Sn(1) C(111) C(112) . . . . 20.5(9) no
  Ru(1) Sn(1) C(111) C(116) . . . . -168.4(7) no
  Ru(1) Sn(1) C(121) C(122) . . . . -71.5(9) no
  Ru(1) Sn(1) C(121) C(126) . . . . 112.4(9) no
  Ru(1) Sn(1) C(131) C(132) . . . . 102.6(9) no
  Ru(1) Sn(1) C(131) C(136) . . . . -74.7(8) no
  Ru(1) Ru(2) Ru(3) Ru(4) . . . . -88.34(3) no
  Ru(1) Ru(2) Ru(3) Ru(5) . . . . -30.93(3) no
  Ru(1) Ru(2) Ru(3) C(1) . . . . -28.6(3) no
  Ru(1) Ru(2) Ru(3) C(31) . . . . 60.6(4) no
  Ru(1) Ru(2) Ru(3) C(32) . . . . 151.6(4) no
  Ru(1) Ru(2) Ru(3) C(33) . . . . -111(1) no
  Ru(1) Ru(2) Ru(4) Ru(3) . . . . 87.52(3) no
  Ru(1) Ru(2) Ru(4) Ru(5) . . . . 30.53(3) no
  Ru(1) Ru(2) Ru(4) C(1) . . . . 28.8(3) no
  Ru(1) Ru(2) Ru(4) C(41) . . . . -156.4(3) no
  Ru(1) Ru(2) Ru(4) C(42) . . . . 99(1) no
  Ru(1) Ru(2) Ru(4) C(43) . . . . -63.7(3) no
  Ru(1) Ru(2) C(1) Ru(3) . . . . 138.4(4) no
  Ru(1) Ru(2) C(1) Ru(4) . . . . -138.1(4) no
  Ru(1) Ru(2) C(1) Ru(5) . . . . -173(6) no
  Ru(1) Ru(2) C(21) O(21) . . . . 5.0(5) no
  Ru(1) Ru(2) C(22) O(22) . . . . -111.7(2) no
  Ru(1) Ru(2) C(23) O(23) . . . . 110(7) no
  Ru(1) Ru(5) Ru(3) Ru(2) . . . . 31.16(3) no
  Ru(1) Ru(5) Ru(3) Ru(4) . . . . 88.02(3) no
  Ru(1) Ru(5) Ru(3) C(1) . . . . 28.9(3) no
  Ru(1) Ru(5) Ru(3) C(31) . . . . -73.9(3) no
  Ru(1) Ru(5) Ru(3) C(32) . . . . 54(4) no
  Ru(1) Ru(5) Ru(3) C(33) . . . . -167.2(3) no
  Ru(1) Ru(5) Ru(4) Ru(2) . . . . -30.78(3) no
  Ru(1) Ru(5) Ru(4) Ru(3) . . . . -88.45(3) no
  Ru(1) Ru(5) Ru(4) C(1) . . . . -29.1(3) no
  Ru(1) Ru(5) Ru(4) C(41) . . . . -82(2) no
  Ru(1) Ru(5) Ru(4) C(42) . . . . 164.4(3) no
  Ru(1) Ru(5) Ru(4) C(43) . . . . 72.0(3) no
  Ru(1) Ru(5) C(1) Ru(2) . . . . 173(6) no
  Ru(1) Ru(5) C(1) Ru(3) . . . . -138.4(4) no
  Ru(1) Ru(5) C(1) Ru(4) . . . . 138.1(4) no
  Ru(1) Ru(5) C(51) O(51) . . . . -21.7(4) no
  Ru(1) Ru(5) C(52) O(52) . . . . 38.4(6) no
  Ru(1) Ru(5) C(53) O(53) . . . . 7.1(5) no
  Ru(1) C(1) Ru(2) Ru(3) . . . . -138.4(4) no
  Ru(1) C(1) Ru(2) Ru(4) . . . . 138.1(4) no
  Ru(1) C(1) Ru(2) C(21) . . . . -173.0(4) no
  Ru(1) C(1) Ru(2) C(22) . . . . -52.2(5) no
  Ru(1) C(1) Ru(2) C(23) . . . . 66.8(5) no
  Ru(1) C(1) Ru(3) Ru(2) . . . . 93.8(7) no
  Ru(1) C(1) Ru(3) Ru(4) . . . . -177.9(8) no
  Ru(1) C(1) Ru(3) Ru(5) . . . . -89.6(6) no
  Ru(1) C(1) Ru(3) C(31) . . . . -7.2(7) no
  Ru(1) C(1) Ru(3) C(32) . . . . 94.1(8) no
  Ru(1) C(1) Ru(3) C(33) . . . . -111.3(7) no
  Ru(1) C(1) Ru(4) Ru(2) . . . . -92.5(6) no
  Ru(1) C(1) Ru(4) Ru(3) . . . . 178.0(8) no
  Ru(1) C(1) Ru(4) Ru(5) . . . . 90.0(6) no
  Ru(1) C(1) Ru(4) C(41) . . . . -99.4(7) no
  Ru(1) C(1) Ru(4) C(42) . . . . 107.5(7) no
  Ru(1) C(1) Ru(4) C(43) . . . . 4.7(7) no
  Ru(1) C(1) Ru(5) Ru(3) . . . . 138.4(4) no
  Ru(1) C(1) Ru(5) Ru(4) . . . . -138.1(4) no
  Ru(1) C(1) Ru(5) C(51) . . . . 178.8(5) no
  Ru(1) C(1) Ru(5) C(52) . . . . 56.0(5) no
  Ru(1) C(1) Ru(5) C(53) . . . . -56.6(5) no
  Ru(2) Ru(1) Sn(1) C(111) . . . . 122.0(3) no
  Ru(2) Ru(1) Sn(1) C(121) . . . . -124.4(2) no
  Ru(2) Ru(1) Sn(1) C(131) . . . . -2.9(3) no
  Ru(2) Ru(1) Ru(5) Ru(3) . . . . -30.14(3) no
  Ru(2) Ru(1) Ru(5) Ru(4) . . . . 29.48(3) no
  Ru(2) Ru(1) Ru(5) C(1) . . . . -0.4(3) no
  Ru(2) Ru(1) Ru(5) C(51) . . . . -169(5) no
  Ru(2) Ru(1) Ru(5) C(52) . . . . -131.4(3) no
  Ru(2) Ru(1) Ru(5) C(53) . . . . 129.8(3) no
  Ru(2) Ru(1) C(1) Ru(3) . . . . -92.4(6) no
  Ru(2) Ru(1) C(1) Ru(4) . . . . 90.7(6) no
  Ru(2) Ru(1) C(1) Ru(5) . . . . 179.4(5) no
  Ru(2) Ru(1) C(11) O(11) . . . . -115.5(1) no
  Ru(2) Ru(1) C(12) O(12) . . . . 109(9) no
  Ru(2) Ru(1) C(13) O(13) . . . . 9.0(2) no
  Ru(2) Ru(3) Ru(4) Ru(5) . . . . 104.79(3) no
  Ru(2) Ru(3) Ru(4) C(1) . . . . 51.9(3) no
  Ru(2) Ru(3) Ru(4) C(41) . . . . -74.2(3) no
  Ru(2) Ru(3) Ru(4) C(42) . . . . -176.6(3) no
  Ru(2) Ru(3) Ru(4) C(43) . . . . 64.8(7) no
  Ru(2) Ru(3) Ru(5) Ru(4) . . . . -56.86(3) no
  Ru(2) Ru(3) Ru(5) C(1) . . . . 2.3(3) no
  Ru(2) Ru(3) Ru(5) C(51) . . . . -151.5(3) no
  Ru(2) Ru(3) Ru(5) C(52) . . . . 116.0(3) no
  Ru(2) Ru(3) Ru(5) C(53) . . . . -37.8(9) no
  Ru(2) Ru(3) C(1) Ru(4) . . . . -88.3(3) no
  Ru(2) Ru(3) C(1) Ru(5) . . . . -176.7(5) no
  Ru(2) Ru(3) C(31) O(31) . . . . 175.0(2) no
  Ru(2) Ru(3) C(32) O(32) . . . . 176.9(3) no
  Ru(2) Ru(3) C(33) O(33) . . . . -38.2(1) no
  Ru(2) Ru(4) Ru(3) Ru(5) . . . . -104.79(3) no
  Ru(2) Ru(4) Ru(3) C(1) . . . . -51.9(3) no
  Ru(2) Ru(4) Ru(3) C(31) . . . . -69.2(6) no
  Ru(2) Ru(4) Ru(3) C(32) . . . . 71.3(5) no
  Ru(2) Ru(4) Ru(3) C(33) . . . . 172.9(3) no
  Ru(2) Ru(4) Ru(5) Ru(3) . . . . 57.67(3) no
  Ru(2) Ru(4) Ru(5) C(1) . . . . -1.7(3) no
  Ru(2) Ru(4) Ru(5) C(51) . . . . 150.6(3) no
  Ru(2) Ru(4) Ru(5) C(52) . . . . 37.2(9) no
  Ru(2) Ru(4) Ru(5) C(53) . . . . -115.3(3) no
  Ru(2) Ru(4) C(1) Ru(3) . . . . 89.6(3) no
  Ru(2) Ru(4) C(1) Ru(5) . . . . 177.5(5) no
  Ru(2) Ru(4) C(41) O(41) . . . . -170.9(3) no
  Ru(2) Ru(4) C(42) O(42) . . . . 93.3(5) no
  Ru(2) Ru(4) C(43) O(43) . . . . -156.2(1) no
  Ru(2) C(1) Ru(1) Ru(5) . . . . -179.4(5) no
  Ru(2) C(1) Ru(1) C(11) . . . . 83.8(4) no
  Ru(2) C(1) Ru(1) C(12) . . . . -83.2(4) no
  Ru(2) C(1) Ru(1) C(13) . . . . 179.5(5) no
  Ru(2) C(1) Ru(3) Ru(4) . . . . 88.3(3) no
  Ru(2) C(1) Ru(3) Ru(5) . . . . 176.7(5) no
  Ru(2) C(1) Ru(3) C(31) . . . . -101.0(4) no
  Ru(2) C(1) Ru(3) C(32) . . . . 0.3(7) no
  Ru(2) C(1) Ru(3) C(33) . . . . 154.9(4) no
  Ru(2) C(1) Ru(4) Ru(3) . . . . -89.6(3) no
  Ru(2) C(1) Ru(4) Ru(5) . . . . -177.5(5) no
  Ru(2) C(1) Ru(4) C(41) . . . . -6.9(6) no
  Ru(2) C(1) Ru(4) C(42) . . . . -160.1(4) no
  Ru(2) C(1) Ru(4) C(43) . . . . 97.2(4) no
  Ru(2) C(1) Ru(5) Ru(3) . . . . -49(6) no
  Ru(2) C(1) Ru(5) Ru(4) . . . . 34(6) no
  Ru(2) C(1) Ru(5) C(51) . . . . -9(6) no
  Ru(2) C(1) Ru(5) C(52) . . . . -131(6) no
  Ru(2) C(1) Ru(5) C(53) . . . . 116(6) no
  Ru(3) Ru(2) Ru(1) Ru(5) . . . . 29.87(3) no
  Ru(3) Ru(2) Ru(1) C(1) . . . . 29.5(3) no
  Ru(3) Ru(2) Ru(1) C(11) . . . . -68.1(3) no
  Ru(3) Ru(2) Ru(1) C(12) . . . . 127.5(3) no
  Ru(3) Ru(2) Ru(1) C(13) . . . . 27(2) no
  Ru(3) Ru(2) Ru(4) Ru(5) . . . . -56.98(3) no
  Ru(3) Ru(2) Ru(4) C(1) . . . . -58.7(3) no
  Ru(3) Ru(2) Ru(4) C(41) . . . . 116.0(3) no
  Ru(3) Ru(2) Ru(4) C(42) . . . . 12(1) no
  Ru(3) Ru(2) Ru(4) C(43) . . . . -151.2(3) no
  Ru(3) Ru(2) C(1) Ru(4) . . . . 83.4(3) no
  Ru(3) Ru(2) C(1) Ru(5) . . . . 49(6) no
  Ru(3) Ru(2) C(21) O(21) . . . . 47.0(5) no
  Ru(3) Ru(2) C(22) O(22) . . . . -26.9(2) no
  Ru(3) Ru(2) C(23) O(23) . . . . 21(7) no
  Ru(3) Ru(4) Ru(2) C(1) . . . . 58.7(3) no
  Ru(3) Ru(4) Ru(2) C(21) . . . . -87.1(3) no
  Ru(3) Ru(4) Ru(2) C(22) . . . . 25(1) no
  Ru(3) Ru(4) Ru(2) C(23) . . . . -178.9(3) no
  Ru(3) Ru(4) Ru(5) C(1) . . . . -59.4(3) no
  Ru(3) Ru(4) Ru(5) C(51) . . . . 92.9(3) no
  Ru(3) Ru(4) Ru(5) C(52) . . . . -20.4(9) no
  Ru(3) Ru(4) Ru(5) C(53) . . . . -173.0(3) no
  Ru(3) Ru(4) C(1) Ru(5) . . . . 87.9(3) no
  Ru(3) Ru(4) C(41) O(41) . . . . -113.7(3) no
  Ru(3) Ru(4) C(42) O(42) . . . . 103.9(5) no
  Ru(3) Ru(4) C(43) O(43) . . . . 149.6(1) no
  Ru(3) Ru(5) Ru(1) C(1) . . . . -29.8(3) no
  Ru(3) Ru(5) Ru(1) C(11) . . . . 58.2(3) no
  Ru(3) Ru(5) Ru(1) C(12) . . . . -118.1(3) no
  Ru(3) Ru(5) Ru(1) C(13) . . . . 149.4(4) no
  Ru(3) Ru(5) Ru(4) C(1) . . . . 59.4(3) no
  Ru(3) Ru(5) Ru(4) C(41) . . . . 6(2) no
  Ru(3) Ru(5) Ru(4) C(42) . . . . -107.2(3) no
  Ru(3) Ru(5) Ru(4) C(43) . . . . 160.5(3) no
  Ru(3) Ru(5) C(1) Ru(4) . . . . -83.5(3) no
  Ru(3) Ru(5) C(51) O(51) . . . . -160.7(3) no
  Ru(3) Ru(5) C(52) O(52) . . . . -47.6(6) no
  Ru(3) Ru(5) C(53) O(53) . . . . 76.3(6) no
  Ru(3) C(1) Ru(1) Ru(5) . . . . 88.2(6) no
  Ru(3) C(1) Ru(1) C(11) . . . . -8.6(7) no
  Ru(3) C(1) Ru(1) C(12) . . . . -175.6(6) no
  Ru(3) C(1) Ru(1) C(13) . . . . 87.1(8) no
  Ru(3) C(1) Ru(2) Ru(4) . . . . -83.4(3) no
  Ru(3) C(1) Ru(2) C(21) . . . . -34.5(6) no
  Ru(3) C(1) Ru(2) C(22) . . . . 86.3(4) no
  Ru(3) C(1) Ru(2) C(23) . . . . -154.7(4) no
  Ru(3) C(1) Ru(4) Ru(5) . . . . -87.9(3) no
  Ru(3) C(1) Ru(4) C(41) . . . . 82.7(5) no
  Ru(3) C(1) Ru(4) C(42) . . . . -70.5(5) no
  Ru(3) C(1) Ru(4) C(43) . . . . -173.2(4) no
  Ru(3) C(1) Ru(5) Ru(4) . . . . 83.5(3) no
  Ru(3) C(1) Ru(5) C(51) . . . . 40.4(7) no
  Ru(3) C(1) Ru(5) C(52) . . . . -82.4(4) no
  Ru(3) C(1) Ru(5) C(53) . . . . 165.0(4) no
  Ru(4) Ru(2) Ru(1) Ru(5) . . . . -29.64(3) no
  Ru(4) Ru(2) Ru(1) C(1) . . . . -30.0(3) no
  Ru(4) Ru(2) Ru(1) C(11) . . . . -127.6(3) no
  Ru(4) Ru(2) Ru(1) C(12) . . . . 68.0(3) no
  Ru(4) Ru(2) Ru(1) C(13) . . . . -33(2) no
  Ru(4) Ru(2) Ru(3) Ru(5) . . . . 57.41(3) no
  Ru(4) Ru(2) Ru(3) C(1) . . . . 59.7(3) no
  Ru(4) Ru(2) Ru(3) C(31) . . . . 148.9(4) no
  Ru(4) Ru(2) Ru(3) C(32) . . . . -120.0(4) no
  Ru(4) Ru(2) Ru(3) C(33) . . . . -22(1) no
  Ru(4) Ru(2) C(1) Ru(5) . . . . -34(6) no
  Ru(4) Ru(2) C(21) O(21) . . . . 106.3(5) no
  Ru(4) Ru(2) C(22) O(22) . . . . -48.8(2) no
  Ru(4) Ru(2) C(23) O(23) . . . . 23(7) no
  Ru(4) Ru(3) Ru(2) C(1) . . . . -59.7(3) no
  Ru(4) Ru(3) Ru(2) C(21) . . . . 95.3(3) no
  Ru(4) Ru(3) Ru(2) C(22) . . . . -172.9(3) no
  Ru(4) Ru(3) Ru(2) C(23) . . . . 2.5(7) no
  Ru(4) Ru(3) Ru(5) C(1) . . . . 59.1(3) no
  Ru(4) Ru(3) Ru(5) C(51) . . . . -94.7(3) no
  Ru(4) Ru(3) Ru(5) C(52) . . . . 172.8(3) no
  Ru(4) Ru(3) Ru(5) C(53) . . . . 19.1(9) no
  Ru(4) Ru(3) C(1) Ru(5) . . . . -88.4(3) no
  Ru(4) Ru(3) C(31) O(31) . . . . -128.2(2) no
  Ru(4) Ru(3) C(32) O(32) . . . . 121.8(3) no
  Ru(4) Ru(3) C(33) O(33) . . . . -57.9(1) no
  Ru(4) Ru(5) Ru(1) C(1) . . . . 29.9(3) no
  Ru(4) Ru(5) Ru(1) C(11) . . . . 117.8(3) no
  Ru(4) Ru(5) Ru(1) C(12) . . . . -58.4(3) no
  Ru(4) Ru(5) Ru(1) C(13) . . . . -151.0(4) no
  Ru(4) Ru(5) Ru(3) C(1) . . . . -59.1(3) no
  Ru(4) Ru(5) Ru(3) C(31) . . . . -161.9(3) no
  Ru(4) Ru(5) Ru(3) C(32) . . . . -34(4) no
  Ru(4) Ru(5) Ru(3) C(33) . . . . 104.8(3) no
  Ru(4) Ru(5) C(51) O(51) . . . . 139.3(3) no
  Ru(4) Ru(5) C(52) O(52) . . . . -29.8(6) no
  Ru(4) Ru(5) C(53) O(53) . . . . 93.0(5) no
  Ru(4) C(1) Ru(1) Ru(5) . . . . -88.8(6) no
  Ru(4) C(1) Ru(1) C(11) . . . . 174.5(6) no
  Ru(4) C(1) Ru(1) C(12) . . . . 7.4(7) no
  Ru(4) C(1) Ru(1) C(13) . . . . -89.9(8) no
  Ru(4) C(1) Ru(2) C(21) . . . . 48.9(6) no
  Ru(4) C(1) Ru(2) C(22) . . . . 169.7(3) no
  Ru(4) C(1) Ru(2) C(23) . . . . -71.3(5) no
  Ru(4) C(1) Ru(3) Ru(5) . . . . 88.4(3) no
  Ru(4) C(1) Ru(3) C(31) . . . . 170.7(4) no
  Ru(4) C(1) Ru(3) C(32) . . . . -88.0(6) no
  Ru(4) C(1) Ru(3) C(33) . . . . 66.6(5) no
  Ru(4) C(1) Ru(5) C(51) . . . . -43.0(7) no
  Ru(4) C(1) Ru(5) C(52) . . . . -165.9(4) no
  Ru(4) C(1) Ru(5) C(53) . . . . 81.5(4) no
  Ru(5) Ru(1) Sn(1) C(111) . . . . -73.0(5) no
  Ru(5) Ru(1) Sn(1) C(121) . . . . 40.5(4) no
  Ru(5) Ru(1) Sn(1) C(131) . . . . 162.1(4) no
  Ru(5) Ru(1) Ru(2) C(1) . . . . 0.4(3) no
  Ru(5) Ru(1) Ru(2) C(21) . . . . 72(4) no
  Ru(5) Ru(1) Ru(2) C(22) . . . . 135.7(3) no
  Ru(5) Ru(1) Ru(2) C(23) . . . . -124.7(3) no
  Ru(5) Ru(1) C(11) O(11) . . . . 161.8(1) no
  Ru(5) Ru(1) C(12) O(12) . . . . -168(9) no
  Ru(5) Ru(1) C(13) O(13) . . . . 5.9(2) no
  Ru(5) Ru(3) Ru(2) C(1) . . . . -2.3(3) no
  Ru(5) Ru(3) Ru(2) C(21) . . . . 152.7(3) no
  Ru(5) Ru(3) Ru(2) C(22) . . . . -115.5(3) no
  Ru(5) Ru(3) Ru(2) C(23) . . . . 59.9(7) no
  Ru(5) Ru(3) Ru(4) C(1) . . . . -52.9(3) no
  Ru(5) Ru(3) Ru(4) C(41) . . . . -178.9(3) no
  Ru(5) Ru(3) Ru(4) C(42) . . . . 78.6(3) no
  Ru(5) Ru(3) Ru(4) C(43) . . . . -40.0(7) no
  Ru(5) Ru(3) C(31) O(31) . . . . -97.7(2) no
  Ru(5) Ru(3) C(32) O(32) . . . . 153.7(3) no
  Ru(5) Ru(3) C(33) O(33) . . . . -117.4(1) no
  Ru(5) Ru(4) Ru(2) C(1) . . . . 1.7(3) no
  Ru(5) Ru(4) Ru(2) C(21) . . . . -144.1(3) no
  Ru(5) Ru(4) Ru(2) C(22) . . . . -32(1) no
  Ru(5) Ru(4) Ru(2) C(23) . . . . 124.1(3) no
  Ru(5) Ru(4) Ru(3) C(1) . . . . 52.9(3) no
  Ru(5) Ru(4) Ru(3) C(31) . . . . 35.6(6) no
  Ru(5) Ru(4) Ru(3) C(32) . . . . 176.0(5) no
  Ru(5) Ru(4) Ru(3) C(33) . . . . -82.4(3) no
  Ru(5) Ru(4) C(41) O(41) . . . . -119.6(3) no
  Ru(5) Ru(4) C(42) O(42) . . . . 162.1(5) no
  Ru(5) Ru(4) C(43) O(43) . . . . 115.7(1) no
  Ru(5) C(1) Ru(1) C(11) . . . . -96.7(4) no
  Ru(5) C(1) Ru(1) C(12) . . . . 96.2(4) no
  Ru(5) C(1) Ru(1) C(13) . . . . -1.1(6) no
  Ru(5) C(1) Ru(2) C(21) . . . . 14(6) no
  Ru(5) C(1) Ru(2) C(22) . . . . 135(6) no
  Ru(5) C(1) Ru(2) C(23) . . . . -106(6) no
  Ru(5) C(1) Ru(3) C(31) . . . . 82.3(4) no
  Ru(5) C(1) Ru(3) C(32) . . . . -176.4(6) no
  Ru(5) C(1) Ru(3) C(33) . . . . -21.8(6) no
  Ru(5) C(1) Ru(4) C(41) . . . . 170.6(4) no
  Ru(5) C(1) Ru(4) C(42) . . . . 17.4(5) no
  Ru(5) C(1) Ru(4) C(43) . . . . -85.3(4) no
  Ru(6) Sn(2) C(141) C(142) . . . . -0.5(9) no
  Ru(6) Sn(2) C(141) C(146) . . . . 177.8(6) no
  Ru(6) Sn(2) C(151) C(152) . . . . -54.2(9) no
  Ru(6) Sn(2) C(151) C(156) . . . . 132.1(7) no
  Ru(6) Sn(2) C(161) C(162) . . . . 102.7(8) no
  Ru(6) Sn(2) C(161) C(166) . . . . -76.7(8) no
  Ru(6) Ru(7) Ru(8) Ru(9) . . . . -88.49(3) no
  Ru(6) Ru(7) Ru(8) Ru(10) . . . . -31.56(3) no
  Ru(6) Ru(7) Ru(8) C(2) . . . . -29.6(3) no
  Ru(6) Ru(7) Ru(8) C(81) . . . . 153.8(3) no
  Ru(6) Ru(7) Ru(8) C(82) . . . . -102(2) no
  Ru(6) Ru(7) Ru(8) C(83) . . . . 63.1(3) no
  Ru(6) Ru(7) Ru(9) Ru(8) . . . . 86.75(3) no
  Ru(6) Ru(7) Ru(9) Ru(10) . . . . 29.94(3) no
  Ru(6) Ru(7) Ru(9) C(2) . . . . 28.4(3) no
  Ru(6) Ru(7) Ru(9) C(91) . . . . -163.1(4) no
  Ru(6) Ru(7) Ru(9) C(92) . . . . 65(2) no
  Ru(6) Ru(7) Ru(9) C(93) . . . . -71.2(3) no
  Ru(6) Ru(7) C(2) Ru(8) . . . . 136.8(4) no
  Ru(6) Ru(7) C(2) Ru(9) . . . . -138.7(4) no
  Ru(6) Ru(7) C(2) Ru(10) . . . . -174(7) no
  Ru(6) Ru(7) C(71) O(71) . . . . -127.7(3) no
  Ru(6) Ru(7) C(72) O(72) . . . . -141.1(2) no
  Ru(6) Ru(7) C(73) O(73) . . . . 94.3(1) no
  Ru(6) Ru(10) Ru(8) Ru(7) . . . . 32.24(3) no
  Ru(6) Ru(10) Ru(8) Ru(9) . . . . 88.86(3) no
  Ru(6) Ru(10) Ru(8) C(2) . . . . 30.3(3) no
  Ru(6) Ru(10) Ru(8) C(81) . . . . 70(2) no
  Ru(6) Ru(10) Ru(8) C(82) . . . . -158.2(3) no
  Ru(6) Ru(10) Ru(8) C(83) . . . . -70.5(3) no
  Ru(6) Ru(10) Ru(9) Ru(7) . . . . -30.61(3) no
  Ru(6) Ru(10) Ru(9) Ru(8) . . . . -88.14(3) no
  Ru(6) Ru(10) Ru(9) C(2) . . . . -29.1(3) no
  Ru(6) Ru(10) Ru(9) C(91) . . . . -107(1) no
  Ru(6) Ru(10) Ru(9) C(92) . . . . 154.7(3) no
  Ru(6) Ru(10) Ru(9) C(93) . . . . 65.3(3) no
  Ru(6) Ru(10) C(2) Ru(7) . . . . 174(7) no
  Ru(6) Ru(10) C(2) Ru(8) . . . . -136.8(4) no
  Ru(6) Ru(10) C(2) Ru(9) . . . . 138.7(4) no
  Ru(6) Ru(10) C(101) O(101) . . . . 54.3(2) no
  Ru(6) Ru(10) C(102) O(102) . . . . -25.1(3) no
  Ru(6) Ru(10) C(103) O(103) . . . . 29.4(3) no
  Ru(6) C(2) Ru(7) Ru(8) . . . . -136.8(4) no
  Ru(6) C(2) Ru(7) Ru(9) . . . . 138.7(4) no
  Ru(6) C(2) Ru(7) C(71) . . . . -179.5(4) no
  Ru(6) C(2) Ru(7) C(72) . . . . -56.2(5) no
  Ru(6) C(2) Ru(7) C(73) . . . . 60.9(5) no
  Ru(6) C(2) Ru(8) Ru(7) . . . . 94.3(6) no
  Ru(6) C(2) Ru(8) Ru(9) . . . . -177.1(8) no
  Ru(6) C(2) Ru(8) Ru(10) . . . . -88.6(6) no
  Ru(6) C(2) Ru(8) C(81) . . . . 98.7(7) no
  Ru(6) C(2) Ru(8) C(82) . . . . -100.2(7) no
  Ru(6) C(2) Ru(8) C(83) . . . . -2.7(7) no
  Ru(6) C(2) Ru(9) Ru(7) . . . . -93.3(6) no
  Ru(6) C(2) Ru(9) Ru(8) . . . . 177.0(8) no
  Ru(6) C(2) Ru(9) Ru(10) . . . . 88.8(6) no
  Ru(6) C(2) Ru(9) C(91) . . . . -108.9(7) no
  Ru(6) C(2) Ru(9) C(92) . . . . 93.7(7) no
  Ru(6) C(2) Ru(9) C(93) . . . . -6.0(7) no
  Ru(6) C(2) Ru(10) Ru(8) . . . . 136.8(4) no
  Ru(6) C(2) Ru(10) Ru(9) . . . . -138.7(4) no
  Ru(6) C(2) Ru(10) C(101) . . . . 56.8(4) no
  Ru(6) C(2) Ru(10) C(102) . . . . -54.0(4) no
  Ru(6) C(2) Ru(10) C(103) . . . . -178.9(4) no
  Ru(7) Ru(6) Sn(2) C(141) . . . . 136.6(2) no
  Ru(7) Ru(6) Sn(2) C(151) . . . . -108.4(2) no
  Ru(7) Ru(6) Sn(2) C(161) . . . . 16.4(3) no
  Ru(7) Ru(6) Ru(10) Ru(8) . . . . -31.06(3) no
  Ru(7) Ru(6) Ru(10) Ru(9) . . . . 29.17(3) no
  Ru(7) Ru(6) Ru(10) C(2) . . . . -0.3(3) no
  Ru(7) Ru(6) Ru(10) C(101) . . . . -130.5(3) no
  Ru(7) Ru(6) Ru(10) C(102) . . . . 131.7(3) no
  Ru(7) Ru(6) Ru(10) C(103) . . . . 169(4) no
  Ru(7) Ru(6) C(2) Ru(8) . . . . -92.8(6) no
  Ru(7) Ru(6) C(2) Ru(9) . . . . 91.6(6) no
  Ru(7) Ru(6) C(2) Ru(10) . . . . 179.6(5) no
  Ru(7) Ru(6) C(61) O(61) . . . . -88.2(1) no
  Ru(7) Ru(6) C(62) O(62) . . . . 9.2(1) no
  Ru(7) Ru(6) C(63) O(63) . . . . 159.3(1) no
  Ru(7) Ru(8) Ru(9) Ru(10) . . . . 104.92(3) no
  Ru(7) Ru(8) Ru(9) C(2) . . . . 52.0(3) no
  Ru(7) Ru(8) Ru(9) C(91) . . . . -79.6(3) no
  Ru(7) Ru(8) Ru(9) C(92) . . . . 176.3(3) no
  Ru(7) Ru(8) Ru(9) C(93) . . . . 46.4(7) no
  Ru(7) Ru(8) Ru(10) Ru(9) . . . . -56.62(3) no
  Ru(7) Ru(8) Ru(10) C(2) . . . . 1.9(3) no
  Ru(7) Ru(8) Ru(10) C(101) . . . . 116.9(3) no
  Ru(7) Ru(8) Ru(10) C(102) . . . . -28.6(8) no
  Ru(7) Ru(8) Ru(10) C(103) . . . . -149.2(3) no
  Ru(7) Ru(8) C(2) Ru(9) . . . . -88.7(3) no
  Ru(7) Ru(8) C(2) Ru(10) . . . . -177.2(5) no
  Ru(7) Ru(8) C(81) O(81) . . . . -153.2(2) no
  Ru(7) Ru(8) C(82) O(82) . . . . -94.2(2) no
  Ru(7) Ru(8) C(83) O(83) . . . . 157(8) no
  Ru(7) Ru(9) Ru(8) Ru(10) . . . . -104.92(3) no
  Ru(7) Ru(9) Ru(8) C(2) . . . . -52.0(3) no
  Ru(7) Ru(9) Ru(8) C(81) . . . . 72.0(3) no
  Ru(7) Ru(9) Ru(8) C(82) . . . . 177.2(3) no
  Ru(7) Ru(9) Ru(8) C(83) . . . . -62.6(7) no
  Ru(7) Ru(9) Ru(10) Ru(8) . . . . 57.53(3) no
  Ru(7) Ru(9) Ru(10) C(2) . . . . -1.5(3) no
  Ru(7) Ru(9) Ru(10) C(101) . . . . 39.9(8) no
  Ru(7) Ru(9) Ru(10) C(102) . . . . -113.2(3) no
  Ru(7) Ru(9) Ru(10) C(103) . . . . 152.0(3) no
  Ru(7) Ru(9) C(2) Ru(8) . . . . 89.7(3) no
  Ru(7) Ru(9) C(2) Ru(10) . . . . 177.8(5) no
  Ru(7) Ru(9) C(91) O(91) . . . . -142.0(1) no
  Ru(7) Ru(9) C(92) O(92) . . . . -177.8(1) no
  Ru(7) Ru(9) C(93) O(93) . . . . -141(9) no
  Ru(7) C(2) Ru(6) Ru(10) . . . . -179.6(5) no
  Ru(7) C(2) Ru(6) C(61) . . . . 82.1(4) no
  Ru(7) C(2) Ru(6) C(62) . . . . -179.2(4) no
  Ru(7) C(2) Ru(6) C(63) . . . . -84.3(4) no
  Ru(7) C(2) Ru(8) Ru(9) . . . . 88.7(3) no
  Ru(7) C(2) Ru(8) Ru(10) . . . . 177.2(5) no
  Ru(7) C(2) Ru(8) C(81) . . . . 4.4(6) no
  Ru(7) C(2) Ru(8) C(82) . . . . 165.5(4) no
  Ru(7) C(2) Ru(8) C(83) . . . . -97.0(4) no
  Ru(7) C(2) Ru(9) Ru(8) . . . . -89.7(3) no
  Ru(7) C(2) Ru(9) Ru(10) . . . . -177.8(5) no
  Ru(7) C(2) Ru(9) C(91) . . . . -15.6(6) no
  Ru(7) C(2) Ru(9) C(92) . . . . -173.0(4) no
  Ru(7) C(2) Ru(9) C(93) . . . . 87.3(4) no
  Ru(7) C(2) Ru(10) Ru(8) . . . . -49(7) no
  Ru(7) C(2) Ru(10) Ru(9) . . . . 35(7) no
  Ru(7) C(2) Ru(10) C(101) . . . . -129(7) no
  Ru(7) C(2) Ru(10) C(102) . . . . 120(7) no
  Ru(7) C(2) Ru(10) C(103) . . . . -5(7) no
  Ru(8) Ru(7) Ru(6) Ru(10) . . . . 30.70(3) no
  Ru(8) Ru(7) Ru(6) C(2) . . . . 30.4(3) no
  Ru(8) Ru(7) Ru(6) C(61) . . . . -68.7(3) no
  Ru(8) Ru(7) Ru(6) C(62) . . . . 34(2) no
  Ru(8) Ru(7) Ru(6) C(63) . . . . 127.3(3) no
  Ru(8) Ru(7) Ru(9) Ru(10) . . . . -56.81(3) no
  Ru(8) Ru(7) Ru(9) C(2) . . . . -58.3(3) no
  Ru(8) Ru(7) Ru(9) C(91) . . . . 110.2(4) no
  Ru(8) Ru(7) Ru(9) C(92) . . . . -22(2) no
  Ru(8) Ru(7) Ru(9) C(93) . . . . -158.0(3) no
  Ru(8) Ru(7) C(2) Ru(9) . . . . 84.5(3) no
  Ru(8) Ru(7) C(2) Ru(10) . . . . 49(7) no
  Ru(8) Ru(7) C(71) O(71) . . . . -148.2(4) no
  Ru(8) Ru(7) C(72) O(72) . . . . -55.8(2) no
  Ru(8) Ru(7) C(73) O(73) . . . . 18.2(1) no
  Ru(8) Ru(9) Ru(7) C(2) . . . . 58.3(3) no
  Ru(8) Ru(9) Ru(7) C(71) . . . . -91.9(3) no
  Ru(8) Ru(9) Ru(7) C(72) . . . . 8(1) no
  Ru(8) Ru(9) Ru(7) C(73) . . . . 175.6(3) no
  Ru(8) Ru(9) Ru(10) C(2) . . . . -59.0(3) no
  Ru(8) Ru(9) Ru(10) C(101) . . . . -17.7(8) no
  Ru(8) Ru(9) Ru(10) C(102) . . . . -170.7(3) no
  Ru(8) Ru(9) Ru(10) C(103) . . . . 94.5(3) no
  Ru(8) Ru(9) C(2) Ru(10) . . . . 88.1(3) no
  Ru(8) Ru(9) C(91) O(91) . . . . -83.0(1) no
  Ru(8) Ru(9) C(92) O(92) . . . . 161.6(1) no
  Ru(8) Ru(9) C(93) O(93) . . . . 179(8) no
  Ru(8) Ru(10) Ru(6) C(2) . . . . -30.8(3) no
  Ru(8) Ru(10) Ru(6) C(61) . . . . 56.4(3) no
  Ru(8) Ru(10) Ru(6) C(62) . . . . 149.5(3) no
  Ru(8) Ru(10) Ru(6) C(63) . . . . -119.6(3) no
  Ru(8) Ru(10) Ru(9) C(2) . . . . 59.0(3) no
  Ru(8) Ru(10) Ru(9) C(91) . . . . -19(1) no
  Ru(8) Ru(10) Ru(9) C(92) . . . . -117.2(3) no
  Ru(8) Ru(10) Ru(9) C(93) . . . . 153.4(3) no
  Ru(8) Ru(10) C(2) Ru(9) . . . . -84.5(3) no
  Ru(8) Ru(10) C(101) O(101) . . . . -32.1(2) no
  Ru(8) Ru(10) C(102) O(102) . . . . 36.4(3) no
  Ru(8) Ru(10) C(103) O(103) . . . . -130.3(2) no
  Ru(8) C(2) Ru(6) Ru(10) . . . . 87.6(6) no
  Ru(8) C(2) Ru(6) C(61) . . . . -10.7(7) no
  Ru(8) C(2) Ru(6) C(62) . . . . 87.9(7) no
  Ru(8) C(2) Ru(6) C(63) . . . . -177.2(6) no
  Ru(8) C(2) Ru(7) Ru(9) . . . . -84.5(3) no
  Ru(8) C(2) Ru(7) C(71) . . . . -42.7(6) no
  Ru(8) C(2) Ru(7) C(72) . . . . 80.7(4) no
  Ru(8) C(2) Ru(7) C(73) . . . . -162.3(4) no
  Ru(8) C(2) Ru(9) Ru(10) . . . . -88.1(3) no
  Ru(8) C(2) Ru(9) C(91) . . . . 74.1(6) no
  Ru(8) C(2) Ru(9) C(92) . . . . -83.2(5) no
  Ru(8) C(2) Ru(9) C(93) . . . . 177.1(4) no
  Ru(8) C(2) Ru(10) Ru(9) . . . . 84.5(3) no
  Ru(8) C(2) Ru(10) C(101) . . . . -80.0(4) no
  Ru(8) C(2) Ru(10) C(102) . . . . 169.2(3) no
  Ru(8) C(2) Ru(10) C(103) . . . . 44.3(6) no
  Ru(9) Ru(7) Ru(6) Ru(10) . . . . -29.17(3) no
  Ru(9) Ru(7) Ru(6) C(2) . . . . -29.4(3) no
  Ru(9) Ru(7) Ru(6) C(61) . . . . -128.6(3) no
  Ru(9) Ru(7) Ru(6) C(62) . . . . -26(2) no
  Ru(9) Ru(7) Ru(6) C(63) . . . . 67.5(3) no
  Ru(9) Ru(7) Ru(8) Ru(10) . . . . 56.93(3) no
  Ru(9) Ru(7) Ru(8) C(2) . . . . 58.9(3) no
  Ru(9) Ru(7) Ru(8) C(81) . . . . -117.7(3) no
  Ru(9) Ru(7) Ru(8) C(82) . . . . -14(2) no
  Ru(9) Ru(7) Ru(8) C(83) . . . . 151.6(3) no
  Ru(9) Ru(7) C(2) Ru(10) . . . . -35(7) no
  Ru(9) Ru(7) C(71) O(71) . . . . -88.4(4) no
  Ru(9) Ru(7) C(72) O(72) . . . . -62.9(3) no
  Ru(9) Ru(7) C(73) O(73) . . . . 8.0(1) no
  Ru(9) Ru(8) Ru(7) C(2) . . . . -58.9(3) no
  Ru(9) Ru(8) Ru(7) C(71) . . . . 90.8(3) no
  Ru(9) Ru(8) Ru(7) C(72) . . . . -177.7(3) no
  Ru(9) Ru(8) Ru(7) C(73) . . . . -11.7(9) no
  Ru(9) Ru(8) Ru(10) C(2) . . . . 58.6(3) no
  Ru(9) Ru(8) Ru(10) C(101) . . . . 173.5(3) no
  Ru(9) Ru(8) Ru(10) C(102) . . . . 28.0(8) no
  Ru(9) Ru(8) Ru(10) C(103) . . . . -92.5(3) no
  Ru(9) Ru(8) C(2) Ru(10) . . . . -88.5(3) no
  Ru(9) Ru(8) C(81) O(81) . . . . 151.6(2) no
  Ru(9) Ru(8) C(82) O(82) . . . . -106.9(2) no
  Ru(9) Ru(8) C(83) O(83) . . . . -151(8) no
  Ru(9) Ru(10) Ru(6) C(2) . . . . 29.4(3) no
  Ru(9) Ru(10) Ru(6) C(61) . . . . 116.6(3) no
  Ru(9) Ru(10) Ru(6) C(62) . . . . -150.3(3) no
  Ru(9) Ru(10) Ru(6) C(63) . . . . -59.3(3) no
  Ru(9) Ru(10) Ru(8) C(2) . . . . -58.6(3) no
  Ru(9) Ru(10) Ru(8) C(81) . . . . -19(2) no
  Ru(9) Ru(10) Ru(8) C(82) . . . . 112.9(3) no
  Ru(9) Ru(10) Ru(8) C(83) . . . . -159.4(3) no
  Ru(9) Ru(10) C(101) O(101) . . . . -16.6(2) no
  Ru(9) Ru(10) C(102) O(102) . . . . 61.0(3) no
  Ru(9) Ru(10) C(103) O(103) . . . . 169.2(2) no
  Ru(9) C(2) Ru(6) Ru(10) . . . . -88.0(6) no
  Ru(9) C(2) Ru(6) C(61) . . . . 173.7(6) no
  Ru(9) C(2) Ru(6) C(62) . . . . -87.7(7) no
  Ru(9) C(2) Ru(6) C(63) . . . . 7.3(7) no
  Ru(9) C(2) Ru(7) C(71) . . . . 41.8(6) no
  Ru(9) C(2) Ru(7) C(72) . . . . 165.2(3) no
  Ru(9) C(2) Ru(7) C(73) . . . . -77.8(5) no
  Ru(9) C(2) Ru(8) Ru(10) . . . . 88.5(3) no
  Ru(9) C(2) Ru(8) C(81) . . . . -84.2(5) no
  Ru(9) C(2) Ru(8) C(82) . . . . 76.8(5) no
  Ru(9) C(2) Ru(8) C(83) . . . . 174.4(4) no
  Ru(9) C(2) Ru(10) C(101) . . . . -164.5(3) no
  Ru(9) C(2) Ru(10) C(102) . . . . 84.6(4) no
  Ru(9) C(2) Ru(10) C(103) . . . . -40.2(6) no
  Ru(10) Ru(6) Sn(2) C(141) . . . . -41.7(4) no
  Ru(10) Ru(6) Sn(2) C(151) . . . . 73.2(4) no
  Ru(10) Ru(6) Sn(2) C(161) . . . . -161.9(4) no
  Ru(10) Ru(6) Ru(7) C(2) . . . . 0.3(3) no
  Ru(10) Ru(6) Ru(7) C(71) . . . . 10(9) no
  Ru(10) Ru(6) Ru(7) C(72) . . . . 134.5(3) no
  Ru(10) Ru(6) Ru(7) C(73) . . . . -128.1(3) no
  Ru(10) Ru(6) C(61) O(61) . . . . -170.7(1) no
  Ru(10) Ru(6) C(62) O(62) . . . . 12.6(1) no
  Ru(10) Ru(6) C(63) O(63) . . . . -118.0(1) no
  Ru(10) Ru(8) Ru(7) C(2) . . . . -2.0(3) no
  Ru(10) Ru(8) Ru(7) C(71) . . . . 147.7(3) no
  Ru(10) Ru(8) Ru(7) C(72) . . . . -120.7(3) no
  Ru(10) Ru(8) Ru(7) C(73) . . . . 45.2(9) no
  Ru(10) Ru(8) Ru(9) C(2) . . . . -52.9(3) no
  Ru(10) Ru(8) Ru(9) C(91) . . . . 175.5(3) no
  Ru(10) Ru(8) Ru(9) C(92) . . . . 71.3(3) no
  Ru(10) Ru(8) Ru(9) C(93) . . . . -58.5(7) no
  Ru(10) Ru(8) C(81) O(81) . . . . 169.0(1) no
  Ru(10) Ru(8) C(82) O(82) . . . . -164.7(2) no
  Ru(10) Ru(8) C(83) O(83) . . . . -115(8) no
  Ru(10) Ru(9) Ru(7) C(2) . . . . 1.5(3) no
  Ru(10) Ru(9) Ru(7) C(71) . . . . -148.7(3) no
  Ru(10) Ru(9) Ru(7) C(72) . . . . -49(1) no
  Ru(10) Ru(9) Ru(7) C(73) . . . . 118.8(3) no
  Ru(10) Ru(9) Ru(8) C(2) . . . . 52.9(3) no
  Ru(10) Ru(9) Ru(8) C(81) . . . . 177.0(3) no
  Ru(10) Ru(9) Ru(8) C(82) . . . . -77.9(3) no
  Ru(10) Ru(9) Ru(8) C(83) . . . . 42.3(7) no
  Ru(10) Ru(9) C(91) O(91) . . . . -65.9(2) no
  Ru(10) Ru(9) C(92) O(92) . . . . -143.1(1) no
  Ru(10) Ru(9) C(93) O(93) . . . . 130(9) no
  Ru(10) C(2) Ru(6) C(61) . . . . -98.2(4) no
  Ru(10) C(2) Ru(6) C(62) . . . . 0.4(6) no
  Ru(10) C(2) Ru(6) C(63) . . . . 95.3(4) no
  Ru(10) C(2) Ru(7) C(71) . . . . 6(7) no
  Ru(10) C(2) Ru(7) C(72) . . . . 130(7) no
  Ru(10) C(2) Ru(7) C(73) . . . . -113(7) no
  Ru(10) C(2) Ru(8) C(81) . . . . -172.7(4) no
  Ru(10) C(2) Ru(8) C(82) . . . . -11.7(6) no
  Ru(10) C(2) Ru(8) C(83) . . . . 85.9(4) no
  Ru(10) C(2) Ru(9) C(91) . . . . 162.2(5) no
  Ru(10) C(2) Ru(9) C(92) . . . . 4.9(6) no
  Ru(10) C(2) Ru(9) C(93) . . . . -94.8(4) no
  O(11) C(11) Ru(1) C(1) . . . . -156.1(1) no
  O(11) C(11) Ru(1) C(12) . . . . -32.1(1) no
  O(11) C(11) Ru(1) C(13) . . . . 72.8(1) no
  O(12) C(12) Ru(1) C(1) . . . . 150(9) no
  O(12) C(12) Ru(1) C(11) . . . . 25(9) no
  O(12) C(12) Ru(1) C(13) . . . . -79(9) no
  O(13) C(13) Ru(1) C(1) . . . . 6.6(2) no
  O(13) C(13) Ru(1) C(11) . . . . 103.7(2) no
  O(13) C(13) Ru(1) C(12) . . . . -91.4(2) no
  O(21) C(21) Ru(2) C(1) . . . . 71.8(5) no
  O(21) C(21) Ru(2) C(22) . . . . -58.4(5) no
  O(21) C(21) Ru(2) C(23) . . . . -158.4(5) no
  O(22) C(22) Ru(2) C(1) . . . . -76.9(2) no
  O(22) C(22) Ru(2) C(21) . . . . 63.4(2) no
  O(22) C(22) Ru(2) C(23) . . . . 155.1(2) no
  O(23) C(23) Ru(2) C(1) . . . . 69(7) no
  O(23) C(23) Ru(2) C(21) . . . . -71(7) no
  O(23) C(23) Ru(2) C(22) . . . . -163(7) no
  O(31) C(31) Ru(3) C(1) . . . . -141.3(2) no
  O(31) C(31) Ru(3) C(32) . . . . 87.4(2) no
  O(31) C(31) Ru(3) C(33) . . . . -7.9(2) no
  O(32) C(32) Ru(3) C(1) . . . . 176.6(3) no
  O(32) C(32) Ru(3) C(31) . . . . -78.1(3) no
  O(32) C(32) Ru(3) C(33) . . . . 15.4(3) no
  O(33) C(33) Ru(3) C(1) . . . . -102.5(1) no
  O(33) C(33) Ru(3) C(31) . . . . 150.3(1) no
  O(33) C(33) Ru(3) C(32) . . . . 58.2(1) no
  O(41) C(41) Ru(4) C(1) . . . . -166.2(3) no
  O(41) C(41) Ru(4) C(42) . . . . -6.7(3) no
  O(41) C(41) Ru(4) C(43) . . . . 86.2(3) no
  O(42) C(42) Ru(4) C(1) . . . . 150.2(5) no
  O(42) C(42) Ru(4) C(41) . . . . -9.6(5) no
  O(42) C(42) Ru(4) C(43) . . . . -103.2(5) no
  O(43) C(43) Ru(4) C(1) . . . . 159.4(1) no
  O(43) C(43) Ru(4) C(41) . . . . -68.2(1) no
  O(43) C(43) Ru(4) C(42) . . . . 28.4(1) no
  O(51) C(51) Ru(5) C(1) . . . . 170.2(3) no
  O(51) C(51) Ru(5) C(52) . . . . -59.5(3) no
  O(51) C(51) Ru(5) C(53) . . . . 38.9(3) no
  O(52) C(52) Ru(5) C(1) . . . . 1.3(6) no
  O(52) C(52) Ru(5) C(51) . . . . -144.1(6) no
  O(52) C(52) Ru(5) C(53) . . . . 122.9(6) no
  O(53) C(53) Ru(5) C(1) . . . . 44.6(5) no
  O(53) C(53) Ru(5) C(51) . . . . -169.3(5) no
  O(53) C(53) Ru(5) C(52) . . . . -77.6(5) no
  O(61) C(61) Ru(6) C(2) . . . . -128.5(1) no
  O(61) C(61) Ru(6) C(62) . . . . 100.7(1) no
  O(61) C(61) Ru(6) C(63) . . . . -5.5(1) no
  O(62) C(62) Ru(6) C(2) . . . . 12.3(1) no
  O(62) C(62) Ru(6) C(61) . . . . 111.6(1) no
  O(62) C(62) Ru(6) C(63) . . . . -83.9(1) no
  O(63) C(63) Ru(6) C(2) . . . . -160.2(1) no
  O(63) C(63) Ru(6) C(61) . . . . 76.6(1) no
  O(63) C(63) Ru(6) C(62) . . . . -29.8(1) no
  O(71) C(71) Ru(7) C(2) . . . . -118.1(4) no
  O(71) C(71) Ru(7) C(72) . . . . 108.0(4) no
  O(71) C(71) Ru(7) C(73) . . . . 10.5(4) no
  O(72) C(72) Ru(7) C(2) . . . . -104.4(2) no
  O(72) C(72) Ru(7) C(71) . . . . 37.2(2) no
  O(72) C(72) Ru(7) C(73) . . . . 129.5(2) no
  O(73) C(73) Ru(7) C(2) . . . . 55.3(1) no
  O(73) C(73) Ru(7) C(71) . . . . -84.3(1) no
  O(73) C(73) Ru(7) C(72) . . . . -175.5(1) no
  O(81) C(81) Ru(8) C(2) . . . . -156.2(2) no
  O(81) C(81) Ru(8) C(82) . . . . 37.7(2) no
  O(81) C(81) Ru(8) C(83) . . . . -50.2(2) no
  O(82) C(82) Ru(8) C(2) . . . . -156.7(2) no
  O(82) C(82) Ru(8) C(81) . . . . 8.7(2) no
  O(82) C(82) Ru(8) C(83) . . . . 99.9(2) no
  O(83) C(83) Ru(8) C(2) . . . . -159(8) no
  O(83) C(83) Ru(8) C(81) . . . . 71(8) no
  O(83) C(83) Ru(8) C(82) . . . . -25(8) no
  O(91) C(91) Ru(9) C(2) . . . . -131.4(1) no
  O(91) C(91) Ru(9) C(92) . . . . 31.0(1) no
  O(91) C(91) Ru(9) C(93) . . . . 121.6(1) no
  O(92) C(92) Ru(9) C(2) . . . . -146.4(1) no
  O(92) C(92) Ru(9) C(91) . . . . 50.3(1) no
  O(92) C(92) Ru(9) C(93) . . . . -41.6(1) no
  O(93) C(93) Ru(9) C(2) . . . . 175(9) no
  O(93) C(93) Ru(9) C(91) . . . . -51(9) no
  O(93) C(93) Ru(9) C(92) . . . . 45(9) no
  O(101) C(101) Ru(10) C(2) . . . . 16.1(2) no
  O(101) C(101) Ru(10) C(102) . . . . 136.8(2) no
  O(101) C(101) Ru(10) C(103) . . . . -129.3(2) no
  O(102) C(102) Ru(10) C(2) . . . . 11.8(3) no
  O(102) C(102) Ru(10) C(101) . . . . -109.3(3) no
  O(102) C(102) Ru(10) C(103) . . . . 157.4(3) no
  O(103) C(103) Ru(10) C(2) . . . . -161.9(2) no
  O(103) C(103) Ru(10) C(101) . . . . -30.7(2) no
  O(103) C(103) Ru(10) C(102) . . . . 66.7(2) no
  C(1) Ru(1) Sn(1) C(111) . . . . 123.1(4) no
  C(1) Ru(1) Sn(1) C(121) . . . . -123.3(4) no
  C(1) Ru(1) Sn(1) C(131) . . . . -1.8(5) no
  C(1) Ru(1) Ru(2) C(21) . . . . 72(4) no
  C(1) Ru(1) Ru(2) C(22) . . . . 135.3(5) no
  C(1) Ru(1) Ru(2) C(23) . . . . -125.1(5) no
  C(1) Ru(1) Ru(5) C(51) . . . . -169(5) no
  C(1) Ru(1) Ru(5) C(52) . . . . -131.0(4) no
  C(1) Ru(1) Ru(5) C(53) . . . . 130.1(5) no
  C(1) Ru(2) Ru(1) C(11) . . . . -97.6(4) no
  C(1) Ru(2) Ru(1) C(12) . . . . 98.0(4) no
  C(1) Ru(2) Ru(1) C(13) . . . . -3(3) no
  C(1) Ru(2) Ru(3) C(31) . . . . 89.2(5) no
  C(1) Ru(2) Ru(3) C(32) . . . . -179.8(5) no
  C(1) Ru(2) Ru(3) C(33) . . . . -82(1) no
  C(1) Ru(2) Ru(4) C(41) . . . . 174.8(4) no
  C(1) Ru(2) Ru(4) C(42) . . . . 71(1) no
  C(1) Ru(2) Ru(4) C(43) . . . . -92.5(4) no
  C(1) Ru(3) Ru(2) C(21) . . . . 155.1(5) no
  C(1) Ru(3) Ru(2) C(22) . . . . -113.2(4) no
  C(1) Ru(3) Ru(2) C(23) . . . . 62.2(8) no
  C(1) Ru(3) Ru(4) C(41) . . . . -126.0(4) no
  C(1) Ru(3) Ru(4) C(42) . . . . 131.5(4) no
  C(1) Ru(3) Ru(4) C(43) . . . . 12.9(7) no
  C(1) Ru(3) Ru(5) C(51) . . . . -153.8(4) no
  C(1) Ru(3) Ru(5) C(52) . . . . 113.7(4) no
  C(1) Ru(3) Ru(5) C(53) . . . . -40.0(9) no
  C(1) Ru(4) Ru(2) C(21) . . . . -145.8(4) no
  C(1) Ru(4) Ru(2) C(22) . . . . -34(1) no
  C(1) Ru(4) Ru(2) C(23) . . . . 122.3(4) no
  C(1) Ru(4) Ru(3) C(31) . . . . -17.3(7) no
  C(1) Ru(4) Ru(3) C(32) . . . . 123.1(5) no
  C(1) Ru(4) Ru(3) C(33) . . . . -135.3(4) no
  C(1) Ru(4) Ru(5) C(51) . . . . 152.3(5) no
  C(1) Ru(4) Ru(5) C(52) . . . . 39.0(9) no
  C(1) Ru(4) Ru(5) C(53) . . . . -113.6(4) no
  C(1) Ru(5) Ru(1) C(11) . . . . 88.0(4) no
  C(1) Ru(5) Ru(1) C(12) . . . . -88.3(4) no
  C(1) Ru(5) Ru(1) C(13) . . . . 179.2(5) no
  C(1) Ru(5) Ru(3) C(31) . . . . -102.7(5) no
  C(1) Ru(5) Ru(3) C(32) . . . . 25(4) no
  C(1) Ru(5) Ru(3) C(33) . . . . 163.9(4) no
  C(1) Ru(5) Ru(4) C(41) . . . . -53(2) no
  C(1) Ru(5) Ru(4) C(42) . . . . -166.6(4) no
  C(1) Ru(5) Ru(4) C(43) . . . . 101.1(5) no
  C(2) Ru(6) Sn(2) C(141) . . . . 136.1(4) no
  C(2) Ru(6) Sn(2) C(151) . . . . -109.0(4) no
  C(2) Ru(6) Sn(2) C(161) . . . . 15.9(5) no
  C(2) Ru(6) Ru(7) C(71) . . . . 10(9) no
  C(2) Ru(6) Ru(7) C(72) . . . . 134.2(4) no
  C(2) Ru(6) Ru(7) C(73) . . . . -128.3(5) no
  C(2) Ru(6) Ru(10) C(101) . . . . -130.2(4) no
  C(2) Ru(6) Ru(10) C(102) . . . . 131.9(4) no
  C(2) Ru(6) Ru(10) C(103) . . . . 169(4) no
  C(2) Ru(7) Ru(6) C(61) . . . . -99.1(4) no
  C(2) Ru(7) Ru(6) C(62) . . . . 4(2) no
  C(2) Ru(7) Ru(6) C(63) . . . . 96.9(4) no
  C(2) Ru(7) Ru(8) C(81) . . . . -176.6(5) no
  C(2) Ru(7) Ru(8) C(82) . . . . -73(2) no
  C(2) Ru(7) Ru(8) C(83) . . . . 92.7(5) no
  C(2) Ru(7) Ru(9) C(91) . . . . 168.5(5) no
  C(2) Ru(7) Ru(9) C(92) . . . . 36(2) no
  C(2) Ru(7) Ru(9) C(93) . . . . -99.7(5) no
  C(2) Ru(8) Ru(7) C(71) . . . . 149.7(5) no
  C(2) Ru(8) Ru(7) C(72) . . . . -118.8(4) no
  C(2) Ru(8) Ru(7) C(73) . . . . 47(1) no
  C(2) Ru(8) Ru(9) C(91) . . . . -131.6(5) no
  C(2) Ru(8) Ru(9) C(92) . . . . 124.2(5) no
  C(2) Ru(8) Ru(9) C(93) . . . . -5.6(7) no
  C(2) Ru(8) Ru(10) C(101) . . . . 115.0(4) no
  C(2) Ru(8) Ru(10) C(102) . . . . -30.5(9) no
  C(2) Ru(8) Ru(10) C(103) . . . . -151.1(4) no
  C(2) Ru(9) Ru(7) C(71) . . . . -150.2(5) no
  C(2) Ru(9) Ru(7) C(72) . . . . -50(1) no
  C(2) Ru(9) Ru(7) C(73) . . . . 117.3(5) no
  C(2) Ru(9) Ru(8) C(81) . . . . 124.0(4) no
  C(2) Ru(9) Ru(8) C(82) . . . . -130.8(4) no
  C(2) Ru(9) Ru(8) C(83) . . . . -10.6(7) no
  C(2) Ru(9) Ru(10) C(101) . . . . 41.3(9) no
  C(2) Ru(9) Ru(10) C(102) . . . . -111.7(4) no
  C(2) Ru(9) Ru(10) C(103) . . . . 153.5(4) no
  C(2) Ru(10) Ru(6) C(61) . . . . 87.2(4) no
  C(2) Ru(10) Ru(6) C(62) . . . . -179.7(4) no
  C(2) Ru(10) Ru(6) C(63) . . . . -88.7(4) no
  C(2) Ru(10) Ru(8) C(81) . . . . 40(2) no
  C(2) Ru(10) Ru(8) C(82) . . . . 171.5(4) no
  C(2) Ru(10) Ru(8) C(83) . . . . -100.8(5) no
  C(2) Ru(10) Ru(9) C(91) . . . . -78(1) no
  C(2) Ru(10) Ru(9) C(92) . . . . -176.2(5) no
  C(2) Ru(10) Ru(9) C(93) . . . . 94.4(5) no
  C(11) Ru(1) Sn(1) C(111) . . . . 34.1(4) no
  C(11) Ru(1) Sn(1) C(121) . . . . 147.6(4) no
  C(11) Ru(1) Sn(1) C(131) . . . . -90.8(4) no
  C(11) Ru(1) Ru(2) C(21) . . . . -26(4) no
  C(11) Ru(1) Ru(2) C(22) . . . . 37.7(4) no
  C(11) Ru(1) Ru(2) C(23) . . . . 137.4(5) no
  C(11) Ru(1) Ru(5) C(51) . . . . -81(5) no
  C(11) Ru(1) Ru(5) C(52) . . . . -43.1(4) no
  C(11) Ru(1) Ru(5) C(53) . . . . -141.9(4) no
  C(12) Ru(1) Sn(1) C(111) . . . . -151.0(4) no
  C(12) Ru(1) Sn(1) C(121) . . . . -37.5(4) no
  C(12) Ru(1) Sn(1) C(131) . . . . 84.1(4) no
  C(12) Ru(1) Ru(2) C(21) . . . . 170(4) no
  C(12) Ru(1) Ru(2) C(22) . . . . -126.7(4) no
  C(12) Ru(1) Ru(2) C(23) . . . . -27.1(5) no
  C(12) Ru(1) Ru(5) C(51) . . . . 103(5) no
  C(12) Ru(1) Ru(5) C(52) . . . . 140.7(4) no
  C(12) Ru(1) Ru(5) C(53) . . . . 41.8(4) no
  C(13) Ru(1) Sn(1) C(111) . . . . -57.7(4) no
  C(13) Ru(1) Sn(1) C(121) . . . . 55.8(4) no
  C(13) Ru(1) Sn(1) C(131) . . . . 177.4(4) no
  C(13) Ru(1) Ru(2) C(21) . . . . 69(4) no
  C(13) Ru(1) Ru(2) C(22) . . . . 133(3) no
  C(13) Ru(1) Ru(2) C(23) . . . . -128(3) no
  C(13) Ru(1) Ru(5) C(51) . . . . 10(5) no
  C(13) Ru(1) Ru(5) C(52) . . . . 48.1(5) no
  C(13) Ru(1) Ru(5) C(53) . . . . -50.7(5) no
  C(21) Ru(2) Ru(3) C(31) . . . . -115.8(5) no
  C(21) Ru(2) Ru(3) C(32) . . . . -24.7(5) no
  C(21) Ru(2) Ru(3) C(33) . . . . 73(1) no
  C(21) Ru(2) Ru(4) C(41) . . . . 28.9(4) no
  C(21) Ru(2) Ru(4) C(42) . . . . -75(1) no
  C(21) Ru(2) Ru(4) C(43) . . . . 121.7(4) no
  C(22) Ru(2) Ru(3) C(31) . . . . -24.0(5) no
  C(22) Ru(2) Ru(3) C(32) . . . . 67.0(5) no
  C(22) Ru(2) Ru(3) C(33) . . . . 165(1) no
  C(22) Ru(2) Ru(4) C(41) . . . . 141(1) no
  C(22) Ru(2) Ru(4) C(42) . . . . 37(1) no
  C(22) Ru(2) Ru(4) C(43) . . . . -127(1) no
  C(23) Ru(2) Ru(3) C(31) . . . . 151.3(8) no
  C(23) Ru(2) Ru(3) C(32) . . . . -117.6(9) no
  C(23) Ru(2) Ru(3) C(33) . . . . -20(1) no
  C(23) Ru(2) Ru(4) C(41) . . . . -62.9(4) no
  C(23) Ru(2) Ru(4) C(42) . . . . -167(1) no
  C(23) Ru(2) Ru(4) C(43) . . . . 29.8(4) no
  C(31) Ru(3) Ru(4) C(41) . . . . -143.3(7) no
  C(31) Ru(3) Ru(4) C(42) . . . . 114.2(7) no
  C(31) Ru(3) Ru(4) C(43) . . . . -4.4(9) no
  C(31) Ru(3) Ru(5) C(51) . . . . 103.4(5) no
  C(31) Ru(3) Ru(5) C(52) . . . . 10.9(4) no
  C(31) Ru(3) Ru(5) C(53) . . . . -142.8(9) no
  C(32) Ru(3) Ru(4) C(41) . . . . -2.9(6) no
  C(32) Ru(3) Ru(4) C(42) . . . . -105.4(5) no
  C(32) Ru(3) Ru(4) C(43) . . . . 136.1(8) no
  C(32) Ru(3) Ru(5) C(51) . . . . -128(4) no
  C(32) Ru(3) Ru(5) C(52) . . . . 139(4) no
  C(32) Ru(3) Ru(5) C(53) . . . . -15(4) no
  C(33) Ru(3) Ru(4) C(41) . . . . 98.7(5) no
  C(33) Ru(3) Ru(4) C(42) . . . . -3.8(4) no
  C(33) Ru(3) Ru(4) C(43) . . . . -122.3(7) no
  C(33) Ru(3) Ru(5) C(51) . . . . 10.1(4) no
  C(33) Ru(3) Ru(5) C(52) . . . . -82.4(4) no
  C(33) Ru(3) Ru(5) C(53) . . . . 123.9(9) no
  C(41) Ru(4) Ru(5) C(51) . . . . 99(2) no
  C(41) Ru(4) Ru(5) C(52) . . . . -14(2) no
  C(41) Ru(4) Ru(5) C(53) . . . . -167(2) no
  C(42) Ru(4) Ru(5) C(51) . . . . -14.3(4) no
  C(42) Ru(4) Ru(5) C(52) . . . . -127.6(9) no
  C(42) Ru(4) Ru(5) C(53) . . . . 79.8(4) no
  C(43) Ru(4) Ru(5) C(51) . . . . -106.6(5) no
  C(43) Ru(4) Ru(5) C(52) . . . . 140(1) no
  C(43) Ru(4) Ru(5) C(53) . . . . -12.5(5) no
  C(61) Ru(6) Sn(2) C(141) . . . . 50.4(4) no
  C(61) Ru(6) Sn(2) C(151) . . . . 165.3(4) no
  C(61) Ru(6) Sn(2) C(161) . . . . -69.8(4) no
  C(61) Ru(6) Ru(7) C(71) . . . . -89(9) no
  C(61) Ru(6) Ru(7) C(72) . . . . 35.1(4) no
  C(61) Ru(6) Ru(7) C(73) . . . . 132.5(5) no
  C(61) Ru(6) Ru(10) C(101) . . . . -43.1(4) no
  C(61) Ru(6) Ru(10) C(102) . . . . -140.9(4) no
  C(61) Ru(6) Ru(10) C(103) . . . . -103(4) no
  C(62) Ru(6) Sn(2) C(141) . . . . -43.9(4) no
  C(62) Ru(6) Sn(2) C(151) . . . . 71.1(4) no
  C(62) Ru(6) Sn(2) C(161) . . . . -164.1(4) no
  C(62) Ru(6) Ru(7) C(71) . . . . 14(9) no
  C(62) Ru(6) Ru(7) C(72) . . . . 138(2) no
  C(62) Ru(6) Ru(7) C(73) . . . . -125(2) no
  C(62) Ru(6) Ru(10) C(101) . . . . 50.0(4) no
  C(62) Ru(6) Ru(10) C(102) . . . . -47.8(4) no
  C(62) Ru(6) Ru(10) C(103) . . . . -10(4) no
  C(63) Ru(6) Sn(2) C(141) . . . . -135.6(4) no
  C(63) Ru(6) Sn(2) C(151) . . . . -20.7(4) no
  C(63) Ru(6) Sn(2) C(161) . . . . 104.2(4) no
  C(63) Ru(6) Ru(7) C(71) . . . . 107(9) no
  C(63) Ru(6) Ru(7) C(72) . . . . -128.9(4) no
  C(63) Ru(6) Ru(7) C(73) . . . . -31.4(5) no
  C(63) Ru(6) Ru(10) C(101) . . . . 141.0(4) no
  C(63) Ru(6) Ru(10) C(102) . . . . 43.2(4) no
  C(63) Ru(6) Ru(10) C(103) . . . . 81(4) no
  C(71) Ru(7) Ru(8) C(81) . . . . -26.9(5) no
  C(71) Ru(7) Ru(8) C(82) . . . . 77(2) no
  C(71) Ru(7) Ru(8) C(83) . . . . -117.6(5) no
  C(71) Ru(7) Ru(9) C(91) . . . . 18.3(5) no
  C(71) Ru(7) Ru(9) C(92) . . . . -114(2) no
  C(71) Ru(7) Ru(9) C(93) . . . . 110.1(5) no
  C(72) Ru(7) Ru(8) C(81) . . . . 64.7(4) no
  C(72) Ru(7) Ru(8) C(82) . . . . 169(2) no
  C(72) Ru(7) Ru(8) C(83) . . . . -26.0(4) no
  C(72) Ru(7) Ru(9) C(91) . . . . 118(1) no
  C(72) Ru(7) Ru(9) C(92) . . . . -14(2) no
  C(72) Ru(7) Ru(9) C(93) . . . . -150(1) no
  C(73) Ru(7) Ru(8) C(81) . . . . -129(1) no
  C(73) Ru(7) Ru(8) C(82) . . . . -26(2) no
  C(73) Ru(7) Ru(8) C(83) . . . . 139.9(9) no
  C(73) Ru(7) Ru(9) C(91) . . . . -74.2(5) no
  C(73) Ru(7) Ru(9) C(92) . . . . 153(2) no
  C(73) Ru(7) Ru(9) C(93) . . . . 17.6(5) no
  C(81) Ru(8) Ru(9) C(91) . . . . -7.6(5) no
  C(81) Ru(8) Ru(9) C(92) . . . . -111.7(5) no
  C(81) Ru(8) Ru(9) C(93) . . . . 118.4(8) no
  C(81) Ru(8) Ru(10) C(101) . . . . 155(2) no
  C(81) Ru(8) Ru(10) C(102) . . . . 9(2) no
  C(81) Ru(8) Ru(10) C(103) . . . . -111(2) no
  C(82) Ru(8) Ru(9) C(91) . . . . 97.6(5) no
  C(82) Ru(8) Ru(9) C(92) . . . . -6.5(5) no
  C(82) Ru(8) Ru(9) C(93) . . . . -136.4(7) no
  C(82) Ru(8) Ru(10) C(101) . . . . -73.6(4) no
  C(82) Ru(8) Ru(10) C(102) . . . . 140.9(9) no
  C(82) Ru(8) Ru(10) C(103) . . . . 20.4(4) no
  C(83) Ru(8) Ru(9) C(91) . . . . -142.2(7) no
  C(83) Ru(8) Ru(9) C(92) . . . . 113.6(7) no
  C(83) Ru(8) Ru(9) C(93) . . . . -16(1) no
  C(83) Ru(8) Ru(10) C(101) . . . . 14.1(5) no
  C(83) Ru(8) Ru(10) C(102) . . . . -131.4(9) no
  C(83) Ru(8) Ru(10) C(103) . . . . 108.1(4) no
  C(91) Ru(9) Ru(10) C(101) . . . . -37(2) no
  C(91) Ru(9) Ru(10) C(102) . . . . 170(1) no
  C(91) Ru(9) Ru(10) C(103) . . . . 76(1) no
  C(92) Ru(9) Ru(10) C(101) . . . . -134.9(9) no
  C(92) Ru(9) Ru(10) C(102) . . . . 72.1(4) no
  C(92) Ru(9) Ru(10) C(103) . . . . -22.7(5) no
  C(93) Ru(9) Ru(10) C(101) . . . . 135.7(9) no
  C(93) Ru(9) Ru(10) C(102) . . . . -17.3(4) no
  C(93) Ru(9) Ru(10) C(103) . . . . -112.1(5) no
  C(111) Sn(1) C(121) C(122) . . . . 49.9(9) no
  C(111) Sn(1) C(121) C(126) . . . . -126.2(9) no
  C(111) Sn(1) C(131) C(132) . . . . -26(1) no
  C(111) Sn(1) C(131) C(136) . . . . 156.5(8) no
  C(111) C(112) C(113) C(114) . . . . 2(2) no
  C(111) C(116) C(115) C(114) . . . . 2(2) no
  C(112) C(111) Sn(1) C(121) . . . . -96.8(8) no
  C(112) C(111) Sn(1) C(131) . . . . 150.1(8) no
  C(112) C(111) C(116) C(115) . . . . -3(2) no
  C(112) C(113) C(114) C(115) . . . . -3(2) no
  C(113) C(112) C(111) C(116) . . . . 2(2) no
  C(113) C(114) C(115) C(116) . . . . 2(2) no
  C(116) C(111) Sn(1) C(121) . . . . 74.2(8) no
  C(116) C(111) Sn(1) C(131) . . . . -38.9(8) no
  C(121) Sn(1) C(131) C(132) . . . . -135.3(9) no
  C(121) Sn(1) C(131) C(136) . . . . 47.3(8) no
  C(121) C(122) C(123) C(124) . . . . 3(3) no
  C(121) C(126) C(125) C(124) . . . . 0(2) no
  C(122) C(121) Sn(1) C(131) . . . . 162.2(9) no
  C(122) C(121) C(126) C(125) . . . . 1(2) no
  C(122) C(123) C(124) C(125) . . . . -1(2) no
  C(123) C(122) C(121) C(126) . . . . -3(2) no
  C(123) C(124) C(125) C(126) . . . . 0(2) no
  C(126) C(121) Sn(1) C(131) . . . . -14(1) no
  C(131) C(132) C(133) C(134) . . . . 0(2) no
  C(131) C(136) C(135) C(134) . . . . 1(2) no
  C(132) C(131) C(136) C(135) . . . . -1(2) no
  C(132) C(133) C(134) C(135) . . . . 0(2) no
  C(133) C(132) C(131) C(136) . . . . 1(2) no
  C(133) C(134) C(135) C(136) . . . . 0(2) no
  C(141) Sn(2) C(151) C(152) . . . . 66.3(9) no
  C(141) Sn(2) C(151) C(156) . . . . -107.5(8) no
  C(141) Sn(2) C(161) C(162) . . . . -21.4(9) no
  C(141) Sn(2) C(161) C(166) . . . . 159.2(7) no
  C(141) C(142) C(143) C(144) . . . . 2(2) no
  C(141) C(146) C(145) C(144) . . . . -2(2) no
  C(142) C(141) Sn(2) C(151) . . . . -121.5(9) no
  C(142) C(141) Sn(2) C(161) . . . . 126.5(9) no
  C(142) C(141) C(146) C(145) . . . . 3(2) no
  C(142) C(143) C(144) C(145) . . . . -1(2) no
  C(143) C(142) C(141) C(146) . . . . -2(2) no
  C(143) C(144) C(145) C(146) . . . . 1(2) no
  C(146) C(141) Sn(2) C(151) . . . . 56.9(8) no
  C(146) C(141) Sn(2) C(161) . . . . -55.1(8) no
  C(151) Sn(2) C(161) C(162) . . . . -129.8(8) no
  C(151) Sn(2) C(161) C(166) . . . . 50.8(8) no
  C(151) C(152) C(153) C(154) . . . . -2(2) no
  C(151) C(156) C(155) C(154) . . . . -1(2) no
  C(152) C(151) Sn(2) C(161) . . . . 176.1(8) no
  C(152) C(151) C(156) C(155) . . . . 1(2) no
  C(152) C(153) C(154) C(155) . . . . 2(2) no
  C(153) C(152) C(151) C(156) . . . . 0(2) no
  C(153) C(154) C(155) C(156) . . . . 0(2) no
  C(156) C(151) Sn(2) C(161) . . . . 2.3(9) no
  C(161) C(162) C(163) C(164) . . . . 0(2) no
  C(161) C(166) C(165) C(164) . . . . 0(2) no
  C(162) C(161) C(166) C(165) . . . . -1(2) no
  C(162) C(163) C(164) C(165) . . . . -1(2) no
  C(163) C(162) C(161) C(166) . . . . 1(2) no
  C(163) C(164) C(165) C(166) . . . . 1(2) no

#===END

Compound 4
data_r5s5sqz

_audit_creation_method            SHELXL-97
_chemical_name_systematic
;
  ?
;
_chemical_name_common             ?
_chemical_melting_point           ?
_chemical_formula_moiety          ?
_chemical_formula_sum
  'C77 H55 O10 Ru5 Sn5'
_chemical_formula_weight          2239.01

loop_
  _atom_type_symbol
  _atom_type_description
  _atom_type_scat_dispersion_real
  _atom_type_scat_dispersion_imag
  _atom_type_scat_source
  'C'  'C'   0.0033   0.0016
  'International Tables Vol C Tables 4.2.6.8 and 6.1.1.4'
  'H'  'H'   0.0000   0.0000
  'International Tables Vol C Tables 4.2.6.8 and 6.1.1.4'
  'O'  'O'   0.0106   0.0060
  'International Tables Vol C Tables 4.2.6.8 and 6.1.1.4'
  'Ru'  'Ru'  -1.2594   0.8363
  'International Tables Vol C Tables 4.2.6.8 and 6.1.1.4'
  'Sn'  'Sn'  -0.6537   1.4246
  'International Tables Vol C Tables 4.2.6.8 and 6.1.1.4'

_symmetry_cell_setting            Monoclinic
_symmetry_space_group_name_H-M    C2/m

loop_
  _symmetry_equiv_pos_as_xyz
  'x, y, z'
  '-x, y, -z'
  'x+1/2, y+1/2, z'
  '-x+1/2, y+1/2, -z'
  '-x, -y, -z'
  'x, -y, z'
  '-x+1/2, -y+1/2, -z'
  'x+1/2, -y+1/2, z'

_cell_length_a                    24.709(2)
_cell_length_b                    22.389(2)
_cell_length_c                    19.3966(18)
_cell_angle_alpha                 90.00
_cell_angle_beta                  99.076(2)
_cell_angle_gamma                 90.00
_cell_volume                      10595.9(17)
_cell_formula_units_Z             4
_cell_measurement_temperature     296(2)
_cell_measurement_reflns_used     9822
_cell_measurement_theta_min       2.34
_cell_measurement_theta_max       23.00

_exptl_crystal_description        SqarePlate
_exptl_crystal_colour             Red
_exptl_crystal_size_max           0.40
_exptl_crystal_size_mid           0.40
_exptl_crystal_size_min           0.02
_exptl_crystal_density_meas       ?
_exptl_crystal_density_diffrn     1.404
_exptl_crystal_density_method     'not measured'
_exptl_crystal_F_000              4268
_exptl_absorpt_coefficient_mu     1.887
_exptl_absorpt_correction_type    SADABS
_exptl_absorpt_correction_T_min   0.679
_exptl_absorpt_correction_T_max   1.00
_exptl_absorpt_process_details    '(SADABS, Bruker, 1997)'

_exptl_special_details
;
  ?
;

_diffrn_ambient_temperature       296(2)
_diffrn_radiation_wavelength      0.71073
_diffrn_radiation_type            MoK\a
_diffrn_radiation_source          'fine-focus sealed tube'
_diffrn_radiation_monochromator   graphite
_diffrn_measurement_device_type   'Bruker SMART APEX CCD diffractometer'
_diffrn_measurement_method        'omega scans'
_diffrn_detector_area_resol_mean  ?
_diffrn_standards_number          ?
_diffrn_standards_interval_count  ?
_diffrn_standards_interval_time   ?
_diffrn_standards_decay_%         <1
_diffrn_reflns_number             36038
_diffrn_reflns_av_R_equivalents   0.0555
_diffrn_reflns_av_sigmaI/netI     0.0502
_diffrn_reflns_limit_h_min        -27
_diffrn_reflns_limit_h_max        27
_diffrn_reflns_limit_k_min        -24
_diffrn_reflns_limit_k_max        24
_diffrn_reflns_limit_l_min        -21
_diffrn_reflns_limit_l_max        21
_diffrn_reflns_theta_min          1.54
_diffrn_reflns_theta_max          23.09
_reflns_number_total              7682
_reflns_number_gt                 5756
_reflns_threshold_expression      >2sigma(I)

_computing_data_collection        'SMART NT V5.619 (Bruker, 2000)'
_computing_cell_refinement        'SAINT+ NT V6.02a (Bruker, 1998)'
_computing_data_reduction         'SAINT+ NT V6.02a'
_computing_structure_solution     'SHELXS-97 (Sheldrick, 1990)'
_computing_structure_refinement   'SHELXL-97 (Sheldrick, 1997)'
_computing_molecular_graphics     'SHELXTL V5.1 (Sheldrick, 1997)'
_computing_publication_material   'SHELXTL V5.1'

_refine_special_details
;
  Refinement of F^2^ against ALL reflections.  The weighted R-factor wR and
  goodness of fit S are based on F^2^, conventional R-factors R are based
  on F, with F set to zero for negative F^2^. The threshold expression of
  F^2^ > 2sigma(F^2^) is used only for calculating R-factors(gt) etc. and is
  not relevant to the choice of reflections for refinement.  R-factors based
  on F^2^ are statistically about twice as large as those based on F, and R-
  factors based on ALL data will be even larger.
;

_refine_ls_structure_factor_coef  Fsqd
_refine_ls_matrix_type            full
_refine_ls_weighting_scheme       calc
_refine_ls_weighting_details
  'calc w=1/[\s^2^(Fo^2^)+(0.1242P)^2^+0.0000P] where P=(Fo^2^+2Fc^2^)/3'
_atom_sites_solution_primary      direct
_atom_sites_solution_secondary    difmap
_atom_sites_solution_hydrogens    geom
_refine_ls_hydrogen_treatment     mixed
_refine_ls_extinction_method      none
_refine_ls_extinction_coef        ?
_refine_ls_number_reflns          7682
_refine_ls_number_parameters      447
_refine_ls_number_restraints      31
_refine_ls_R_factor_all           0.0712
_refine_ls_R_factor_gt            0.0582
_refine_ls_wR_factor_ref          0.1657
_refine_ls_wR_factor_gt           0.1549
_refine_ls_goodness_of_fit_ref    0.962
_refine_ls_restrained_S_all       0.962
_refine_ls_shift/su_max           0.001
_refine_ls_shift/su_mean          0.000

loop_
  _atom_site_label
  _atom_site_type_symbol
  _atom_site_fract_x
  _atom_site_fract_y
  _atom_site_fract_z
  _atom_site_U_iso_or_equiv
  _atom_site_adp_type
  _atom_site_occupancy
  _atom_site_symmetry_multiplicity
  _atom_site_calc_flag
  _atom_site_refinement_flags
  _atom_site_disorder_assembly
  _atom_site_disorder_group
Ru1 Ru 0.21911(3) 1.0000 0.65103(4) 0.0452(2) Uani 1 2 d S . .
Ru2 Ru 0.33236(3) 1.0000 0.72039(4) 0.0407(2) Uani 1 2 d S . .
Ru3 Ru 0.25461(2) 0.90923(3) 0.74967(3) 0.0461(2) Uani 1 1 d . . .
Ru4 Ru 0.18244(4) 1.0000 0.78621(4) 0.0495(3) Uani 1 2 d S . .
Sn1 Sn 0.41076(3) 1.0000 0.63450(4) 0.0554(2) Uani 1 2 d S . .
Sn2 Sn 0.35404(2) 0.88633(2) 0.71074(3) 0.0507(2) Uani 1 1 d . . .
Sn3 Sn 0.15832(2) 0.88406(2) 0.78000(3) 0.0585(2) Uani 1 1 d . . .
O11 O 0.2098(3) 0.8976(3) 0.5471(4) 0.096(2) Uani 1 1 d . A .
O12 O 0.0952(4) 1.0000 0.6273(5) 0.080(3) Uani 1 2 d S A .
O21 O 0.4218(4) 1.0000 0.8439(6) 0.098(3) Uani 1 2 d S A .
O31 O 0.2960(3) 0.8550(4) 0.8900(4) 0.117(3) Uani 1 1 d . A .
O32 O 0.2288(3) 0.7946(3) 0.6666(4) 0.106(2) Uani 1 1 d . A .
O41 O 0.0594(4) 1.0000 0.7882(6) 0.107(3) Uani 1 2 d S A .
O42 O 0.2090(5) 1.0000 0.9421(6) 0.116(4) Uani 1 2 d S A .
C1 C 0.2603(4) 1.0000 0.7574(4) 0.044(2) Uani 1 2 d S . .
C11 C 0.2139(4) 0.9340(4) 0.5879(4) 0.063(2) Uani 1 1 d . . .
C12 C 0.1407(5) 1.0000 0.6449(7) 0.065(3) Uani 1 2 d S . .
C21 C 0.3864(5) 1.0000 0.7964(6) 0.053(3) Uani 1 2 d S . .
C31 C 0.2819(4) 0.8750(4) 0.8368(5) 0.073(2) Uani 1 1 d . . .
C32 C 0.2390(3) 0.8367(4) 0.7001(5) 0.067(2) Uani 1 1 d . . .
C41 C 0.1050(6) 1.0000 0.7851(7) 0.074(3) Uani 1 2 d S . .
C42 C 0.1995(6) 1.0000 0.8853(8) 0.070(3) Uani 1 2 d S . .
C51 C 0.3800(5) 1.0000 0.5221(5) 0.055(3) Uani 1 2 d S . .
C52 C 0.3268(6) 1.0000 0.4944(7) 0.080(4) Uani 1 2 d S . .
H52 H 0.3006 1.0000 0.5240 0.096 Uiso 1 2 calc SR . .
C53 C 0.3099(6) 1.0000 0.4236(7) 0.094(5) Uani 1 2 d S . .
H53 H 0.2726 1.0000 0.4061 0.113 Uiso 1 2 calc SR . .
C54 C 0.3465(7) 1.0000 0.3788(8) 0.098(5) Uani 1 2 d S . .
H54 H 0.3351 1.0000 0.3307 0.118 Uiso 1 2 calc SR . .
C55 C 0.4002(7) 1.0000 0.4063(8) 0.096(5) Uani 1 2 d S . .
H55 H 0.4260 1.0000 0.3761 0.116 Uiso 1 2 calc SR . .
C56 C 0.4190(6) 1.0000 0.4788(7) 0.078(4) Uani 1 2 d S . .
H56 H 0.4562 1.0000 0.4966 0.093 Uiso 1 2 calc SR . .
C57 C 0.4702(3) 0.9268(4) 0.6514(5) 0.067(2) Uani 1 1 d . . .
C58 C 0.4778(4) 0.8909(4) 0.5953(5) 0.081(3) Uani 1 1 d . . .
H58 H 0.4552 0.8956 0.5525 0.097 Uiso 1 1 calc R . .
C59 C 0.5190(5) 0.8481(5) 0.6026(7) 0.098(3) Uani 1 1 d . . .
H59 H 0.5227 0.8219 0.5663 0.118 Uiso 1 1 calc R . .
C60 C 0.5540(5) 0.8454(5) 0.6647(8) 0.113(4) Uani 1 1 d . . .
H60 H 0.5829 0.8184 0.6696 0.136 Uiso 1 1 calc R . .
C61 C 0.5479(5) 0.8806(6) 0.7184(8) 0.119(4) Uani 1 1 d . . .
H61 H 0.5716 0.8772 0.7604 0.143 Uiso 1 1 calc R . .
C62 C 0.5054(4) 0.9225(5) 0.7111(6) 0.099(3) Uani 1 1 d . . .
H62 H 0.5016 0.9476 0.7482 0.119 Uiso 1 1 calc R . .
C63 C 0.3476(4) 0.8295(4) 0.6206(5) 0.072(2) Uani 1 1 d . . .
C64 C 0.3384(5) 0.8493(5) 0.5553(5) 0.093(3) Uani 1 1 d . . .
H64 H 0.3372 0.8902 0.5469 0.111 Uiso 1 1 calc R . .
C65 C 0.3302(6) 0.8093(7) 0.4985(6) 0.120(4) Uani 1 1 d . . .
H65 H 0.3229 0.8234 0.4529 0.145 Uiso 1 1 calc R . .
C66 C 0.3333(6) 0.7503(7) 0.5116(10) 0.139(6) Uani 1 1 d . . .
H66 H 0.3301 0.7237 0.4743 0.167 Uiso 1 1 calc R . .
C67 C 0.3406(6) 0.7293(6) 0.5757(9) 0.120(4) Uani 1 1 d . . .
H67 H 0.3398 0.6882 0.5831 0.144 Uiso 1 1 calc R . .
C68 C 0.3491(4) 0.7666(4) 0.6305(6) 0.094(3) Uani 1 1 d . . .
H68 H 0.3561 0.7511 0.6755 0.112 Uiso 1 1 calc R . .
C69 C 0.4103(3) 0.8430(4) 0.7901(4) 0.064(2) Uani 1 1 d . . .
C70 C 0.4445(5) 0.7996(5) 0.7751(6) 0.108(4) Uani 1 1 d . . .
H70 H 0.4437 0.7878 0.7290 0.129 Uiso 1 1 calc R . .
C71 C 0.4808(5) 0.7723(6) 0.8277(8) 0.132(5) Uani 1 1 d . . .
H71 H 0.5036 0.7421 0.8161 0.158 Uiso 1 1 calc R . .
C72 C 0.4837(5) 0.7879(6) 0.8921(7) 0.118(4) Uani 1 1 d . . .
H72 H 0.5084 0.7686 0.9260 0.141 Uiso 1 1 calc R . .
C73 C 0.4509(5) 0.8326(6) 0.9118(6) 0.098(3) Uani 1 1 d . . .
H73 H 0.4535 0.8442 0.9583 0.118 Uiso 1 1 calc R . .
C74 C 0.4139(4) 0.8595(4) 0.8595(5) 0.071(2) Uani 1 1 d . . .
H74 H 0.3909 0.8894 0.8715 0.086 Uiso 1 1 calc R . .
C75A C 0.1522(4) 0.8301(5) 0.8685(6) 0.124(2) Uiso 0.745(9) 1 d PD A 1
C76A C 0.1273(5) 0.7772(6) 0.8583(7) 0.124(2) Uiso 0.745(9) 1 d PD A 1
H76A H 0.1087 0.7683 0.8140 0.149 Uiso 0.745(9) 1 calc PR A 1
C77A C 0.1277(5) 0.7354(6) 0.9102(8) 0.124(2) Uiso 0.745(9) 1 d PD A 1
H77A H 0.1100 0.6989 0.9016 0.149 Uiso 0.745(9) 1 calc PR A 1
C78A C 0.1541(5) 0.7490(6) 0.9723(7) 0.124(2) Uiso 0.745(9) 1 d PD A 1
H78A H 0.1543 0.7209 1.0076 0.149 Uiso 0.745(9) 1 calc PR A 1
C79A C 0.1802(5) 0.7994(7) 0.9882(6) 0.124(2) Uiso 0.745(9) 1 d PD A 1
H79A H 0.1984 0.8064 1.0332 0.149 Uiso 0.745(9) 1 calc PR A 1
C80A C 0.1799(5) 0.8428(6) 0.9350(7) 0.124(2) Uiso 0.745(9) 1 d PD A 1
H80A H 0.1978 0.8791 0.9444 0.149 Uiso 0.745(9) 1 calc PR A 1
C75B C 0.1522(4) 0.8301(5) 0.8685(6) 0.124(2) Uiso 0.255(9) 1 d PD A 2
C76B C 0.1685(10) 0.7733(7) 0.8702(10) 0.124(2) Uiso 0.255(9) 1 d PD A 2
H76B H 0.1832 0.7585 0.8323 0.149 Uiso 0.255(9) 1 calc PR A 2
C77B C 0.1649(12) 0.7355(8) 0.9250(14) 0.124(2) Uiso 0.255(9) 1 d PD A 2
H77B H 0.1766 0.6961 0.9245 0.149 Uiso 0.255(9) 1 calc PR A 2
C78B C 0.1442(11) 0.7570(10) 0.9781(11) 0.124(2) Uiso 0.255(9) 1 d PD A 2
H78B H 0.1416 0.7316 1.0154 0.149 Uiso 0.255(9) 1 calc PR A 2
C79B C 0.1268(13) 0.8122(12) 0.9820(10) 0.124(2) Uiso 0.255(9) 1 d PD A 2
H79B H 0.1124 0.8252 1.0208 0.149 Uiso 0.255(9) 1 calc PR A 2
C80B C 0.1305(11) 0.8515(8) 0.9257(10) 0.124(2) Uiso 0.255(9) 1 d PD A 2
H80B H 0.1186 0.8909 0.9269 0.149 Uiso 0.255(9) 1 calc PR A 2
C81 C 0.0916(3) 0.8541(4) 0.7046(4) 0.068(2) Uani 1 1 d D A .
C82 C 0.0941(4) 0.8430(5) 0.6377(5) 0.090(3) Uani 1 1 d D . .
H82 H 0.1271 0.8497 0.6216 0.108 Uiso 1 1 calc R A .
C83 C 0.0504(5) 0.8222(7) 0.5914(6) 0.121(4) Uani 1 1 d D A .
H83 H 0.0537 0.8143 0.5451 0.145 Uiso 1 1 calc R . .
C84 C 0.0039(5) 0.8138(7) 0.6146(7) 0.124(5) Uani 1 1 d D . .
H84 H -0.0253 0.7979 0.5841 0.149 Uiso 1 1 calc R A .
C85 C -0.0039(4) 0.8265(6) 0.6785(7) 0.114(4) Uani 1 1 d D A .
H85 H -0.0381 0.8214 0.6918 0.137 Uiso 1 1 calc R . .
C86 C 0.0409(4) 0.8480(5) 0.7266(5) 0.090(3) Uani 1 1 d D . .
H86 H 0.0366 0.8579 0.7720 0.108 Uiso 1 1 calc R A .

loop_
  _atom_site_aniso_label
  _atom_site_aniso_U_11
  _atom_site_aniso_U_22
  _atom_site_aniso_U_33
  _atom_site_aniso_U_23
  _atom_site_aniso_U_13
  _atom_site_aniso_U_12
Ru1 0.0480(5) 0.0356(5) 0.0509(5) 0.000 0.0048(4) 0.000
Ru2 0.0461(5) 0.0284(4) 0.0470(5) 0.000 0.0054(4) 0.000
Ru3 0.0533(4) 0.0279(3) 0.0568(4) 0.0027(2) 0.0075(3) -0.0022(2)
Ru4 0.0531(5) 0.0405(5) 0.0566(6) 0.000 0.0141(4) 0.000
Sn1 0.0551(5) 0.0470(5) 0.0659(5) 0.000 0.0150(4) 0.000
Sn2 0.0577(4) 0.0308(3) 0.0627(4) -0.0030(2) 0.0068(3) 0.0051(2)
Sn3 0.0612(4) 0.0472(4) 0.0682(4) 0.0055(2) 0.0137(3) -0.0121(3)
O11 0.113(6) 0.079(5) 0.096(5) -0.041(4) 0.015(4) -0.011(4)
O12 0.054(5) 0.100(7) 0.083(6) 0.000 -0.003(4) 0.000
O21 0.095(7) 0.055(5) 0.126(8) 0.000 -0.042(6) 0.000
O31 0.115(6) 0.135(7) 0.094(5) 0.058(5) 0.000(4) 0.001(5)
O32 0.101(5) 0.064(4) 0.153(7) -0.035(5) 0.016(5) -0.013(4)
O41 0.060(6) 0.133(10) 0.134(9) 0.000 0.034(6) 0.000
O42 0.159(11) 0.124(9) 0.073(7) 0.000 0.041(7) 0.000
C1 0.071(7) 0.036(6) 0.026(5) 0.000 0.008(4) 0.000
C11 0.072(5) 0.046(5) 0.067(6) -0.007(4) 0.004(4) -0.004(4)
C12 0.058(8) 0.049(7) 0.084(9) 0.000 0.004(6) 0.000
C21 0.069(7) 0.027(5) 0.065(7) 0.000 0.013(6) 0.000
C31 0.071(6) 0.066(6) 0.082(7) 0.024(5) 0.015(5) -0.010(5)
C32 0.056(5) 0.044(5) 0.099(7) -0.013(5) 0.004(4) -0.007(4)
C41 0.082(10) 0.076(9) 0.066(8) 0.000 0.019(7) 0.000
C42 0.085(9) 0.061(8) 0.067(9) 0.000 0.025(7) 0.000
C51 0.064(7) 0.051(6) 0.049(6) 0.000 0.008(5) 0.000
C52 0.070(9) 0.096(10) 0.079(10) 0.000 0.027(7) 0.000
C53 0.071(9) 0.136(14) 0.072(10) 0.000 0.001(8) 0.000
C54 0.105(12) 0.126(14) 0.064(9) 0.000 0.015(9) 0.000
C55 0.094(12) 0.099(12) 0.101(12) 0.000 0.030(9) 0.000
C56 0.077(9) 0.088(10) 0.070(9) 0.000 0.017(7) 0.000
C57 0.056(5) 0.064(5) 0.086(6) 0.000(5) 0.022(5) 0.014(4)
C58 0.090(7) 0.067(6) 0.090(7) 0.011(5) 0.026(5) 0.027(5)
C59 0.098(8) 0.075(7) 0.127(9) -0.005(7) 0.036(7) 0.024(6)
C60 0.093(9) 0.079(8) 0.171(13) 0.006(8) 0.035(9) 0.049(7)
C61 0.075(8) 0.130(11) 0.144(12) 0.004(9) -0.011(7) 0.032(8)
C62 0.091(8) 0.096(8) 0.103(8) 0.004(6) -0.008(6) 0.025(7)
C63 0.064(5) 0.053(5) 0.104(8) -0.026(5) 0.025(5) -0.007(4)
C64 0.139(10) 0.069(6) 0.074(7) -0.017(5) 0.028(6) -0.031(7)
C65 0.160(12) 0.135(12) 0.067(7) -0.021(7) 0.021(7) -0.033(10)
C66 0.153(13) 0.094(11) 0.177(16) -0.073(11) 0.047(13) -0.010(10)
C67 0.134(11) 0.070(8) 0.153(13) -0.022(9) 0.012(10) 0.001(7)
C68 0.112(8) 0.052(6) 0.109(8) -0.033(6) -0.005(6) 0.017(6)
C69 0.069(5) 0.047(5) 0.075(6) 0.005(4) 0.013(4) 0.019(4)
C70 0.135(10) 0.091(8) 0.094(8) -0.002(6) 0.007(7) 0.042(8)
C71 0.135(11) 0.138(12) 0.112(10) -0.008(9) -0.015(8) 0.093(10)
C72 0.107(9) 0.134(11) 0.107(10) 0.017(8) 0.001(7) 0.058(9)
C73 0.102(8) 0.098(8) 0.089(8) 0.012(6) 0.000(6) 0.005(7)
C74 0.083(6) 0.062(6) 0.067(6) 0.012(5) 0.007(5) 0.012(5)
C81 0.069(6) 0.047(5) 0.083(7) 0.005(4) 0.001(5) -0.017(4)
C82 0.078(7) 0.107(9) 0.086(7) -0.008(6) 0.012(6) -0.025(6)
C83 0.106(10) 0.145(12) 0.105(9) -0.027(8) -0.002(8) -0.038(9)
C84 0.105(10) 0.140(12) 0.121(11) -0.020(9) -0.002(8) -0.054(9)
C85 0.067(7) 0.134(11) 0.142(11) 0.027(9) 0.016(7) -0.033(7)
C86 0.066(6) 0.095(8) 0.107(8) 0.017(6) 0.010(6) -0.023(6)

_geom_special_details
;
  All esds (except the esd in the dihedral angle between two l.s. planes)
  are estimated using the full covariance matrix.  The cell esds are taken
  into account individually in the estimation of esds in distances, angles
  and torsion angles; correlations between esds in cell parameters are only
  used when they are defined by crystal symmetry.  An approximate (isotropic)
  treatment of cell esds is used for estimating esds involving l.s. planes.
;

loop_
  _geom_bond_atom_site_label_1
  _geom_bond_atom_site_label_2
  _geom_bond_distance
  _geom_bond_site_symmetry_2
  _geom_bond_publ_flag
Ru1 C11 1.911(9) . ?
Ru1 C11 1.911(9) 6_575 ?
Ru1 C12 1.922(13) . ?
Ru1 C1 2.153(9) . ?
Ru1 Ru3 2.8338(8) 6_575 ?
Ru1 Ru3 2.8338(8) . ?
Ru1 Ru4 2.9062(12) . ?
Ru1 Ru2 2.9075(11) . ?
Ru2 C21 1.825(12) . ?
Ru2 C1 2.022(10) . ?
Ru2 Sn2 2.6134(5) . ?
Ru2 Sn2 2.6134(6) 6_575 ?
Ru2 Sn1 2.7470(11) . ?
Ru2 Ru3 2.9135(8) . ?
Ru2 Ru3 2.9135(8) 6_575 ?
Ru3 C31 1.881(10) . ?
Ru3 C32 1.895(8) . ?
Ru3 C1 2.0410(11) . ?
Ru3 Sn3 2.6011(8) . ?
Ru3 Sn2 2.7303(8) . ?
Ru3 Ru4 2.8655(8) . ?
Ru4 C42 1.901(15) . ?
Ru4 C41 1.911(15) . ?
Ru4 C1 2.087(10) . ?
Ru4 Sn3 2.6618(6) . ?
Ru4 Sn3 2.6618(6) 6_575 ?
Ru4 Ru3 2.8655(8) 6_575 ?
Sn1 C57 2.191(8) 6_575 ?
Sn1 C57 2.191(8) . ?
Sn1 C51 2.192(10) . ?
Sn2 C69 2.138(8) . ?
Sn2 C63 2.148(9) . ?
Sn3 C75A 2.124(10) . ?
Sn3 C81 2.131(8) . ?
O11 C11 1.129(9) . ?
O12 C12 1.123(13) . ?
O21 C21 1.167(13) . ?
O31 C31 1.130(10) . ?
O32 C32 1.149(10) . ?
O41 C41 1.137(15) . ?
O42 C42 1.089(14) . ?
C1 Ru3 2.0410(11) 6_575 ?
C51 C52 1.341(17) . ?
C51 C56 1.373(17) . ?
C52 C53 1.371(17) . ?
C53 C54 1.35(2) . ?
C54 C55 1.35(2) . ?
C55 C56 1.410(19) . ?
C57 C62 1.337(13) . ?
C57 C58 1.390(12) . ?
C58 C59 1.389(13) . ?
C59 C60 1.370(16) . ?
C60 C61 1.332(16) . ?
C61 C62 1.397(15) . ?
C63 C64 1.326(13) . ?
C63 C68 1.422(13) . ?
C64 C65 1.409(14) . ?
C65 C66 1.345(19) . ?
C66 C67 1.316(18) . ?
C67 C68 1.343(15) . ?
C69 C70 1.348(13) . ?
C69 C74 1.386(11) . ?
C70 C71 1.390(14) . ?
C71 C72 1.289(16) . ?
C72 C73 1.379(16) . ?
C73 C74 1.393(13) . ?
C75A C76A 1.334(11) . ?
C75A C80A 1.390(11) . ?
C76A C77A 1.373(12) . ?
C77A C78A 1.311(13) . ?
C78A C79A 1.312(13) . ?
C79A C80A 1.416(12) . ?
C76B C77B 1.372(12) . ?
C77B C78B 1.312(13) . ?
C78B C79B 1.314(13) . ?
C79B C80B 1.416(12) . ?
C81 C82 1.333(10) . ?
C81 C86 1.392(10) . ?
C82 C83 1.372(11) . ?
C83 C84 1.313(13) . ?
C84 C85 1.314(13) . ?
C85 C86 1.415(12) . ?

loop_
  _geom_angle_atom_site_label_1
  _geom_angle_atom_site_label_2
  _geom_angle_atom_site_label_3
  _geom_angle
  _geom_angle_site_symmetry_1
  _geom_angle_site_symmetry_3
  _geom_angle_publ_flag
C11 Ru1 C11 101.3(5) . 6_575 ?
C11 Ru1 C12 89.8(4) . . ?
C11 Ru1 C12 89.8(4) 6_575 . ?
C11 Ru1 C1 126.0(3) . . ?
C11 Ru1 C1 126.0(3) 6_575 . ?
C12 Ru1 C1 112.3(5) . . ?
C11 Ru1 Ru3 165.9(3) . 6_575 ?
C11 Ru1 Ru3 82.0(2) 6_575 6_575 ?
C12 Ru1 Ru3 104.1(3) . 6_575 ?
C1 Ru1 Ru3 45.847(19) . 6_575 ?
C11 Ru1 Ru3 82.0(2) . . ?
C11 Ru1 Ru3 165.9(3) 6_575 . ?
C12 Ru1 Ru3 104.1(3) . . ?
C1 Ru1 Ru3 45.847(19) . . ?
Ru3 Ru1 Ru3 91.64(3) 6_575 . ?
C11 Ru1 Ru4 125.4(3) . . ?
C11 Ru1 Ru4 125.4(3) 6_575 . ?
C12 Ru1 Ru4 66.5(4) . . ?
C1 Ru1 Ru4 45.8(3) . . ?
Ru3 Ru1 Ru4 59.88(2) 6_575 . ?
Ru3 Ru1 Ru4 59.88(2) . . ?
C11 Ru1 Ru2 105.0(3) . . ?
C11 Ru1 Ru2 105.0(3) 6_575 . ?
C12 Ru1 Ru2 156.3(4) . . ?
C1 Ru1 Ru2 44.0(3) . . ?
Ru3 Ru1 Ru2 60.97(2) 6_575 . ?
Ru3 Ru1 Ru2 60.97(2) . . ?
Ru4 Ru1 Ru2 89.82(3) . . ?
C21 Ru2 C1 106.6(4) . . ?
C21 Ru2 Sn2 85.75(8) . . ?
C1 Ru2 Sn2 103.14(2) . . ?
C21 Ru2 Sn2 85.75(8) . 6_575 ?
C1 Ru2 Sn2 103.14(2) . 6_575 ?
Sn2 Ru2 Sn2 153.70(4) . 6_575 ?
C21 Ru2 Sn1 89.6(4) . . ?
C1 Ru2 Sn1 163.8(3) . . ?
Sn2 Ru2 Sn1 77.55(2) . . ?
Sn2 Ru2 Sn1 77.55(2) 6_575 . ?
C21 Ru2 Ru1 154.3(4) . . ?
C1 Ru2 Ru1 47.7(3) . . ?
Sn2 Ru2 Ru1 99.21(2) . . ?
Sn2 Ru2 Ru1 99.21(2) 6_575 . ?
Sn1 Ru2 Ru1 116.02(4) . . ?
C21 Ru2 Ru3 105.3(2) . . ?
C1 Ru2 Ru3 44.45(3) . . ?
Sn2 Ru2 Ru3 58.910(18) . . ?
Sn2 Ru2 Ru3 147.36(3) 6_575 . ?
Sn1 Ru2 Ru3 131.92(2) . . ?
Ru1 Ru2 Ru3 58.26(2) . . ?
C21 Ru2 Ru3 105.3(2) . 6_575 ?
C1 Ru2 Ru3 44.45(3) . 6_575 ?
Sn2 Ru2 Ru3 147.36(3) . 6_575 ?
Sn2 Ru2 Ru3 58.910(18) 6_575 6_575 ?
Sn1 Ru2 Ru3 131.916(19) . 6_575 ?
Ru1 Ru2 Ru3 58.26(2) . 6_575 ?
Ru3 Ru2 Ru3 88.46(3) . 6_575 ?
C31 Ru3 C32 97.1(4) . . ?
C31 Ru3 C1 109.2(4) . . ?
C32 Ru3 C1 153.7(4) . . ?
C31 Ru3 Sn3 85.4(3) . . ?
C32 Ru3 Sn3 79.0(3) . . ?
C1 Ru3 Sn3 104.7(3) . . ?
C31 Ru3 Sn2 87.8(3) . . ?
C32 Ru3 Sn2 79.5(3) . . ?
C1 Ru3 Sn2 98.8(3) . . ?
Sn3 Ru3 Sn2 156.48(3) . . ?
C31 Ru3 Ru1 158.0(3) . . ?
C32 Ru3 Ru1 104.8(3) . . ?
C1 Ru3 Ru1 49.2(2) . . ?
Sn3 Ru3 Ru1 96.39(3) . . ?
Sn2 Ru3 Ru1 98.29(3) . . ?
C31 Ru3 Ru4 102.5(3) . . ?
C32 Ru3 Ru4 130.4(3) . . ?
C1 Ru3 Ru4 46.7(3) . . ?
Sn3 Ru3 Ru4 58.04(2) . . ?
Sn2 Ru3 Ru4 145.47(3) . . ?
Ru1 Ru3 Ru4 61.31(3) . . ?
C31 Ru3 Ru2 107.7(3) . . ?
C32 Ru3 Ru2 125.9(3) . . ?
C1 Ru3 Ru2 43.9(3) . . ?
Sn3 Ru3 Ru2 148.22(3) . . ?
Sn2 Ru3 Ru2 55.054(19) . . ?
Ru1 Ru3 Ru2 60.76(2) . . ?
Ru4 Ru3 Ru2 90.50(2) . . ?
C42 Ru4 C41 94.2(5) . . ?
C42 Ru4 C1 101.8(5) . . ?
C41 Ru4 C1 164.0(4) . . ?
C42 Ru4 Sn3 93.33(9) . . ?
C41 Ru4 Sn3 77.45(3) . . ?
C1 Ru4 Sn3 101.37(3) . . ?
C42 Ru4 Sn3 93.33(9) . 6_575 ?
C41 Ru4 Sn3 77.45(3) . 6_575 ?
C1 Ru4 Sn3 101.37(3) . 6_575 ?
Sn3 Ru4 Sn3 154.43(4) . 6_575 ?
C42 Ru4 Ru3 101.7(3) . 6_575 ?
C41 Ru4 Ru3 131.19(13) . 6_575 ?
C1 Ru4 Ru3 45.38(3) . 6_575 ?
Sn3 Ru4 Ru3 145.49(3) . 6_575 ?
Sn3 Ru4 Ru3 55.999(19) 6_575 6_575 ?
C42 Ru4 Ru3 101.7(3) . . ?
C41 Ru4 Ru3 131.19(13) . . ?
C1 Ru4 Ru3 45.38(3) . . ?
Sn3 Ru4 Ru3 55.999(18) . . ?
Sn3 Ru4 Ru3 145.49(3) 6_575 . ?
Ru3 Ru4 Ru3 90.34(3) 6_575 . ?
C42 Ru4 Ru1 149.4(4) . . ?
C41 Ru4 Ru1 116.4(4) . . ?
C1 Ru4 Ru1 47.7(2) . . ?
Sn3 Ru4 Ru1 93.36(2) . . ?
Sn3 Ru4 Ru1 93.36(2) 6_575 . ?
Ru3 Ru4 Ru1 58.81(2) 6_575 . ?
Ru3 Ru4 Ru1 58.81(2) . . ?
C57 Sn1 C57 96.8(5) 6_575 . ?
C57 Sn1 C51 105.5(3) 6_575 . ?
C57 Sn1 C51 105.5(3) . . ?
C57 Sn1 Ru2 115.5(2) 6_575 . ?
C57 Sn1 Ru2 115.5(2) . . ?
C51 Sn1 Ru2 115.9(3) . . ?
C69 Sn2 C63 105.9(3) . . ?
C69 Sn2 Ru2 120.5(2) . . ?
C63 Sn2 Ru2 130.2(3) . . ?
C69 Sn2 Ru3 113.4(2) . . ?
C63 Sn2 Ru3 112.5(2) . . ?
Ru2 Sn2 Ru3 66.04(2) . . ?
C75A Sn3 C81 103.3(4) . . ?
C75A Sn3 Ru3 119.3(3) . . ?
C81 Sn3 Ru3 123.3(2) . . ?
C75A Sn3 Ru4 124.2(3) . . ?
C81 Sn3 Ru4 118.7(2) . . ?
Ru3 Sn3 Ru4 65.97(3) . . ?
Ru2 C1 Ru3 91.6(3) . . ?
Ru2 C1 Ru3 91.6(3) . 6_575 ?
Ru3 C1 Ru3 169.3(5) . 6_575 ?
Ru2 C1 Ru4 174.8(5) . . ?
Ru3 C1 Ru4 87.9(3) . . ?
Ru3 C1 Ru4 87.9(3) 6_575 . ?
Ru2 C1 Ru1 88.2(3) . . ?
Ru3 C1 Ru1 85.0(2) . . ?
Ru3 C1 Ru1 85.0(2) 6_575 . ?
Ru4 C1 Ru1 86.5(4) . . ?
O11 C11 Ru1 175.5(8) . . ?
O12 C12 Ru1 166.0(11) . . ?
O21 C21 Ru2 178.4(11) . . ?
O31 C31 Ru3 176.8(9) . . ?
O32 C32 Ru3 176.1(9) . . ?
O41 C41 Ru4 176.4(12) . . ?
O42 C42 Ru4 179.7(13) . . ?
C52 C51 C56 119.5(12) . . ?
C52 C51 Sn1 124.2(9) . . ?
C56 C51 Sn1 116.2(9) . . ?
C51 C52 C53 121.7(12) . . ?
C54 C53 C52 121.1(14) . . ?
C53 C54 C55 117.5(14) . . ?
C54 C55 C56 122.8(14) . . ?
C51 C56 C55 117.3(13) . . ?
C62 C57 C58 119.1(9) . . ?
C62 C57 Sn1 120.9(7) . . ?
C58 C57 Sn1 119.0(7) . . ?
C59 C58 C57 120.5(10) . . ?
C60 C59 C58 118.0(10) . . ?
C61 C60 C59 121.9(11) . . ?
C60 C61 C62 119.6(12) . . ?
C57 C62 C61 120.8(11) . . ?
C64 C63 C68 117.2(9) . . ?
C64 C63 Sn2 124.0(7) . . ?
C68 C63 Sn2 118.6(8) . . ?
C63 C64 C65 121.1(11) . . ?
C66 C65 C64 118.7(13) . . ?
C67 C66 C65 121.7(13) . . ?
C66 C67 C68 120.4(13) . . ?
C67 C68 C63 120.8(11) . . ?
C70 C69 C74 117.2(9) . . ?
C70 C69 Sn2 122.0(7) . . ?
C74 C69 Sn2 120.8(6) . . ?
C69 C70 C71 120.8(11) . . ?
C72 C71 C70 121.6(12) . . ?
C71 C72 C73 121.3(11) . . ?
C72 C73 C74 117.4(11) . . ?
C69 C74 C73 121.7(9) . . ?
C76A C75A C80A 117.8(9) . . ?
C76A C75A Sn3 118.4(8) . . ?
C80A C75A Sn3 123.1(9) . . ?
C75A C76A C77A 123.1(10) . . ?
C78A C77A C76A 117.4(11) . . ?
C77A C78A C79A 124.7(11) . . ?
C78A C79A C80A 118.2(10) . . ?
C75A C80A C79A 118.7(10) . . ?
C78B C77B C76B 117.6(11) . . ?
C77B C78B C79B 124.1(11) . . ?
C78B C79B C80B 118.6(10) . . ?
C82 C81 C86 117.5(8) . . ?
C82 C81 Sn3 125.3(6) . . ?
C86 C81 Sn3 117.2(7) . . ?
C81 C82 C83 123.3(9) . . ?
C84 C83 C82 117.7(10) . . ?
C83 C84 C85 124.1(10) . . ?
C84 C85 C86 118.6(9) . . ?
C81 C86 C85 118.7(9) . . ?

_diffrn_measured_fraction_theta_max    0.996
_diffrn_reflns_theta_full              23.09
_diffrn_measured_fraction_theta_full   0.996
_refine_diff_density_max    2.271
_refine_diff_density_min   -1.565
_refine_diff_density_rms    0.201

#===END

Compound 5

data_rusnb1s

_audit_creation_method            SHELXL-97
_chemical_name_systematic
;
  ?
;
_chemical_name_common             ?
_chemical_melting_point           ?
_chemical_formula_moiety          ?
_chemical_formula_sum
  'C36 H22 O11 Ru5 Sn'
_chemical_formula_weight          1254.58

loop_
  _atom_type_symbol
  _atom_type_description
  _atom_type_scat_dispersion_real
  _atom_type_scat_dispersion_imag
  _atom_type_scat_source
  'C'  'C'   0.0033   0.0016
  'International Tables Vol C Tables 4.2.6.8 and 6.1.1.4'
  'H'  'H'   0.0000   0.0000
  'International Tables Vol C Tables 4.2.6.8 and 6.1.1.4'
  'O'  'O'   0.0106   0.0060
  'International Tables Vol C Tables 4.2.6.8 and 6.1.1.4'
  'Ru'  'Ru'  -1.2594   0.8363
  'International Tables Vol C Tables 4.2.6.8 and 6.1.1.4'
  'Sn'  'Sn'  -0.6537   1.4246
  'International Tables Vol C Tables 4.2.6.8 and 6.1.1.4'

_symmetry_cell_setting            monoclinic
_symmetry_space_group_name_H-M    P21/n

loop_
  _symmetry_equiv_pos_as_xyz
  'x, y, z'
  '-x+1/2, y+1/2, -z+1/2'
  '-x, -y, -z'
  'x-1/2, -y-1/2, z-1/2'

_cell_length_a                    12.3859(7)
_cell_length_b                    18.8897(11)
_cell_length_c                    17.2928(10)
_cell_angle_alpha                 90.00
_cell_angle_beta                  106.6430(10)
_cell_angle_gamma                 90.00
_cell_volume                      3876.4(4)
_cell_formula_units_Z             4
_cell_measurement_temperature     293(2)
_cell_measurement_reflns_used     8292
_cell_measurement_theta_min       2.38
_cell_measurement_theta_max       26.39

_exptl_crystal_description        bar
_exptl_crystal_colour             red
_exptl_crystal_size_max           ?
_exptl_crystal_size_mid           ?
_exptl_crystal_size_min           ?
_exptl_crystal_density_meas       ?
_exptl_crystal_density_diffrn     2.150
_exptl_crystal_density_method     'not measured'
_exptl_crystal_F_000              2384
_exptl_absorpt_coefficient_mu     2.590
_exptl_absorpt_correction_type    SADABS
_exptl_absorpt_correction_T_min   0.346
_exptl_absorpt_correction_T_max   0.745
_exptl_absorpt_process_details    '(SADABS, Bruker, 1997)'

_exptl_special_details
;
  ?
;

_diffrn_ambient_temperature       293(2)
_diffrn_radiation_wavelength      0.71073
_diffrn_radiation_type            MoK\a
_diffrn_radiation_source          'fine-focus sealed tube'
_diffrn_radiation_monochromator   graphite
_diffrn_measurement_device_type   'Bruker SMART APEX CCD diffractometer'
_diffrn_measurement_method        'omega scans'
_diffrn_detector_area_resol_mean  ?
_diffrn_standards_number          ?
_diffrn_standards_interval_count  ?
_diffrn_standards_interval_time   ?
_diffrn_standards_decay_%         <1
_diffrn_reflns_number             35398
_diffrn_reflns_av_R_equivalents   0.0430
_diffrn_reflns_av_sigmaI/netI     0.0372
_diffrn_reflns_limit_h_min        -15
_diffrn_reflns_limit_h_max        15
_diffrn_reflns_limit_k_min        -23
_diffrn_reflns_limit_k_max        23
_diffrn_reflns_limit_l_min        -21
_diffrn_reflns_limit_l_max        21
_diffrn_reflns_theta_min          1.63
_diffrn_reflns_theta_max          26.39
_reflns_number_total              7935
_reflns_number_gt                 6463
_reflns_threshold_expression      >2sigma(I)

_computing_data_collection        'SMART NT V5.619 (Bruker, 2000)'
_computing_cell_refinement        'SAINT+ NT V6.02a (Bruker, 1998)'
_computing_data_reduction         'SAINT+ NT V6.02a'
_computing_structure_solution     'SHELXS-97 (Sheldrick, 1990)'
_computing_structure_refinement   'SHELXL-97 (Sheldrick, 1997)'
_computing_molecular_graphics     'SHELXTL V5.1 (Sheldrick, 1997)'
_computing_publication_material   'SHELXTL V5.1'

_refine_special_details
;
  Refinement of F^2^ against ALL reflections.  The weighted R-factor wR and
  goodness of fit S are based on F^2^, conventional R-factors R are based
  on F, with F set to zero for negative F^2^. The threshold expression of
  F^2^ > 2sigma(F^2^) is used only for calculating R-factors(gt) etc. and is
  not relevant to the choice of reflections for refinement.  R-factors based
  on F^2^ are statistically about twice as large as those based on F, and R-
  factors based on ALL data will be even larger.
;

_refine_ls_structure_factor_coef  Fsqd
_refine_ls_matrix_type            full
_refine_ls_weighting_scheme       calc
_refine_ls_weighting_details
; calc
  [0.00000+1.00000exp(1.85(sin\q/\l)^2^)]/
    [\s^2^(Fo^2^)+0.0000+0.0000*P+(0.0198P)^2^+0.0000sin\q/\l]
  where P = 0.33333Fo^2^ + 0.66667Fc^2^
;
_atom_sites_solution_primary      direct
_atom_sites_solution_secondary    difmap
_atom_sites_solution_hydrogens    geom
_refine_ls_hydrogen_treatment     mixed
_refine_ls_extinction_method      SHELXL
_refine_ls_extinction_coef        0.00095(3)
_refine_ls_extinction_expression
  'Fc^*^=kFc[1+0.001xFc^2^\l^3^/sin(2\q)]^-1/4^'
_refine_ls_number_reflns          7935
_refine_ls_number_parameters      483
_refine_ls_number_restraints      0
_refine_ls_R_factor_all           0.0272
_refine_ls_R_factor_gt            0.0225
_refine_ls_wR_factor_ref          0.0486
_refine_ls_wR_factor_gt           0.0478
_refine_ls_goodness_of_fit_ref    1.002
_refine_ls_restrained_S_all       1.002
_refine_ls_shift/su_max           0.002
_refine_ls_shift/su_mean          0.000

loop_
  _atom_site_label
  _atom_site_type_symbol
  _atom_site_fract_x
  _atom_site_fract_y
  _atom_site_fract_z
  _atom_site_U_iso_or_equiv
  _atom_site_adp_type
  _atom_site_occupancy
  _atom_site_symmetry_multiplicity
  _atom_site_calc_flag
  _atom_site_refinement_flags
  _atom_site_disorder_assembly
  _atom_site_disorder_group
Ru1 Ru 0.73942(2) 0.287137(13) 0.708576(15) 0.03364(6) Uani 1 1 d . . .
Ru2 Ru 0.57607(2) 0.205241(12) 0.600040(14) 0.03346(6) Uani 1 1 d . . .
Ru3 Ru 0.56352(2) 0.354244(13) 0.585297(14) 0.03393(6) Uani 1 1 d . . .
Ru4 Ru 0.55916(2) 0.358504(13) 0.748116(14) 0.03282(6) Uani 1 1 d . . .
Ru5 Ru 0.57576(2) 0.208139(12) 0.765380(14) 0.03088(6) Uani 1 1 d . . .
Sn1 Sn 0.370591(17) 0.163211(11) 0.755019(12) 0.03371(6) Uani 1 1 d . . .
O11 O 0.8475(2) 0.20024(18) 0.85801(18) 0.0869(10) Uani 1 1 d . . .
O12 O 0.8826(2) 0.40789(16) 0.8013(2) 0.0860(10) Uani 1 1 d . . .
O13 O 0.9068(3) 0.21107(17) 0.6385(2) 0.0883(10) Uani 1 1 d . . .
O21 O 0.6611(3) 0.05537(14) 0.63753(19) 0.0848(10) Uani 1 1 d . . .
O22 O 0.6933(3) 0.20035(16) 0.46817(19) 0.0936(11) Uani 1 1 d . . .
O23 O 0.3417(2) 0.16747(16) 0.49343(17) 0.0800(9) Uani 1 1 d . . .
O31 O 0.6021(3) 0.51322(13) 0.59581(17) 0.0737(8) Uani 1 1 d . . .
O32 O 0.5897(2) 0.35243(15) 0.41530(15) 0.0673(8) Uani 1 1 d . . .
O33 O 0.3103(2) 0.36759(14) 0.51475(16) 0.0608(7) Uani 1 1 d . . .
O51 O 0.6389(3) 0.05597(14) 0.80839(17) 0.0752(8) Uani 1 1 d . . .
O52 O 0.6082(2) 0.23245(14) 0.94218(14) 0.0601(7) Uani 1 1 d . . .
C1 C 0.5548(2) 0.28233(14) 0.67616(16) 0.0299(6) Uani 1 1 d . . .
C11 C 0.7910(3) 0.2276(2) 0.8027(2) 0.0532(9) Uani 1 1 d . . .
C12 C 0.8273(3) 0.36401(19) 0.7673(2) 0.0523(9) Uani 1 1 d . . .
C13 C 0.8441(3) 0.23994(19) 0.6630(2) 0.0526(9) Uani 1 1 d . . .
C21 C 0.6264(3) 0.11111(19) 0.6269(2) 0.0509(9) Uani 1 1 d . . .
C22 C 0.6465(4) 0.20379(18) 0.5154(2) 0.0549(10) Uani 1 1 d . . .
C23 C 0.4283(3) 0.18081(18) 0.5342(2) 0.0487(8) Uani 1 1 d . . .
C31 C 0.5885(3) 0.45381(18) 0.5942(2) 0.0487(8) Uani 1 1 d . . .
C32 C 0.5827(3) 0.35099(18) 0.4785(2) 0.0449(8) Uani 1 1 d . . .
C33 C 0.4043(3) 0.36255(16) 0.54089(19) 0.0404(7) Uani 1 1 d . . .
C41 C 0.6354(3) 0.43860(18) 0.8461(2) 0.0528(9) Uani 1 1 d . . .
H41 H 0.7104 0.4484 0.8728 0.063 Uiso 1 1 calc R . .
C42 C 0.5810(3) 0.47484(18) 0.7755(2) 0.0553(9) Uani 1 1 d . . .
H42 H 0.6195 0.5086 0.7545 0.066 Uiso 1 1 calc R . .
C43 C 0.4667(3) 0.45981(18) 0.7361(2) 0.0550(9) Uani 1 1 d . . .
H43 H 0.4304 0.4836 0.6887 0.066 Uiso 1 1 calc R . .
C44 C 0.4071(3) 0.40952(19) 0.7672(2) 0.0520(9) Uani 1 1 d . . .
H44 H 0.3313 0.4008 0.7419 0.062 Uiso 1 1 calc R . .
C45 C 0.4638(3) 0.37290(19) 0.8372(2) 0.0495(9) Uani 1 1 d . . .
H45 H 0.4263 0.3383 0.8578 0.059 Uiso 1 1 calc R . .
C46 C 0.5778(3) 0.38803(19) 0.8767(2) 0.0489(8) Uani 1 1 d . . .
H46 H 0.6146 0.3638 0.9237 0.059 Uiso 1 1 calc R . .
C51 C 0.6122(3) 0.11255(18) 0.7890(2) 0.0457(8) Uani 1 1 d . . .
C52 C 0.5937(3) 0.22487(17) 0.87441(19) 0.0408(7) Uani 1 1 d . . .
C61 C 0.3586(3) 0.11459(17) 0.86502(18) 0.0389(7) Uani 1 1 d . . .
C62 C 0.3343(3) 0.0432(2) 0.8652(2) 0.0623(10) Uani 1 1 d . . .
H62 H 0.3233 0.0172 0.8179 0.075 Uiso 1 1 calc R . .
C63 C 0.3259(4) 0.0097(2) 0.9342(3) 0.0839(14) Uani 1 1 d . . .
H63 H 0.3099 -0.0384 0.9331 0.101 Uiso 1 1 calc R . .
C64 C 0.3412(4) 0.0473(3) 1.0042(3) 0.0743(13) Uani 1 1 d . . .
H64 H 0.3356 0.0247 1.0506 0.089 Uiso 1 1 calc R . .
C65 C 0.3647(3) 0.1181(2) 1.0059(2) 0.0576(10) Uani 1 1 d . . .
H65 H 0.3750 0.1437 1.0533 0.069 Uiso 1 1 calc R . .
C66 C 0.3732(3) 0.15134(19) 0.93626(19) 0.0445(8) Uani 1 1 d . . .
H66 H 0.3890 0.1995 0.9377 0.053 Uiso 1 1 calc R . .
C71 C 0.2471(2) 0.24619(17) 0.72670(18) 0.0377(7) Uani 1 1 d . . .
C72 C 0.2012(3) 0.27368(19) 0.7846(2) 0.0484(8) Uani 1 1 d . . .
H72 H 0.2228 0.2550 0.8365 0.058 Uiso 1 1 calc R . .
C73 C 0.1237(3) 0.3286(2) 0.7665(2) 0.0583(10) Uani 1 1 d . . .
H73 H 0.0950 0.3470 0.8064 0.070 Uiso 1 1 calc R . .
C74 C 0.0895(3) 0.3559(2) 0.6901(2) 0.0545(9) Uani 1 1 d . . .
H74 H 0.0376 0.3928 0.6781 0.065 Uiso 1 1 calc R . .
C75 C 0.1318(3) 0.32856(19) 0.6313(2) 0.0522(9) Uani 1 1 d . . .
H75 H 0.1073 0.3464 0.5790 0.063 Uiso 1 1 calc R . .
C76 C 0.2105(3) 0.27467(18) 0.6491(2) 0.0445(8) Uani 1 1 d . . .
H76 H 0.2395 0.2572 0.6089 0.053 Uiso 1 1 calc R . .
C81 C 0.3038(3) 0.08339(17) 0.66478(18) 0.0439(8) Uani 1 1 d . . .
C82 C 0.3679(4) 0.03271(19) 0.6416(2) 0.0594(10) Uani 1 1 d . . .
H82 H 0.4456 0.0324 0.6646 0.071 Uiso 1 1 calc R . .
C83 C 0.3186(5) -0.0178(2) 0.5844(3) 0.0798(14) Uani 1 1 d . . .
H83 H 0.3636 -0.0510 0.5687 0.096 Uiso 1 1 calc R . .
C84 C 0.2050(5) -0.0193(2) 0.5511(3) 0.0861(16) Uani 1 1 d . . .
H84 H 0.1720 -0.0538 0.5132 0.103 Uiso 1 1 calc R . .
C85 C 0.1401(4) 0.0301(3) 0.5736(3) 0.0834(14) Uani 1 1 d . . .
H85 H 0.0623 0.0293 0.5510 0.100 Uiso 1 1 calc R . .
C86 C 0.1887(3) 0.0816(2) 0.6299(2) 0.0610(10) Uani 1 1 d . . .
H86 H 0.1432 0.1153 0.6443 0.073 Uiso 1 1 calc R . .
H1 H 0.716(3) 0.3462(18) 0.626(2) 0.068(11) Uiso 1 1 d . . .

loop_
  _atom_site_aniso_label
  _atom_site_aniso_U_11
  _atom_site_aniso_U_22
  _atom_site_aniso_U_33
  _atom_site_aniso_U_23
  _atom_site_aniso_U_13
  _atom_site_aniso_U_12
Ru1 0.02976(13) 0.03709(14) 0.03348(13) 0.00327(10) 0.00813(10) -0.00029(10)
Ru2 0.04197(14) 0.03182(13) 0.02660(12) -0.00046(9) 0.00986(11) 0.00079(10)
Ru3 0.03755(14) 0.03278(13) 0.03015(13) 0.00620(10) 0.00758(11) 0.00076(10)
Ru4 0.03280(13) 0.03271(13) 0.03127(13) -0.00443(10) 0.00648(10) -0.00141(10)
Ru5 0.03204(13) 0.03419(13) 0.02555(12) 0.00450(9) 0.00684(10) 0.00002(10)
Sn1 0.03475(11) 0.03733(12) 0.02815(11) -0.00116(8) 0.00757(9) -0.00430(9)
O11 0.0462(16) 0.129(3) 0.074(2) 0.0558(19) -0.0002(15) 0.0090(17)
O12 0.0544(17) 0.071(2) 0.126(3) -0.0401(19) 0.0166(18) -0.0168(15)
O13 0.068(2) 0.091(2) 0.120(3) -0.0229(19) 0.048(2) 0.0112(16)
O21 0.121(3) 0.0502(17) 0.097(2) 0.0189(16) 0.054(2) 0.0358(17)
O22 0.164(3) 0.071(2) 0.076(2) -0.0066(16) 0.083(2) -0.005(2)
O23 0.0630(19) 0.092(2) 0.0649(19) -0.0008(16) -0.0139(15) -0.0119(16)
O31 0.098(2) 0.0386(15) 0.077(2) 0.0085(13) 0.0134(17) -0.0110(14)
O32 0.0623(17) 0.102(2) 0.0402(15) 0.0090(14) 0.0188(13) -0.0021(15)
O33 0.0435(15) 0.0727(18) 0.0639(17) 0.0026(13) 0.0116(13) 0.0066(13)
O51 0.100(2) 0.0478(16) 0.0748(19) 0.0222(14) 0.0199(17) 0.0224(15)
O52 0.0707(18) 0.0783(18) 0.0280(13) 0.0014(12) 0.0087(12) -0.0133(14)
C1 0.0298(15) 0.0331(15) 0.0259(14) 0.0024(11) 0.0065(12) -0.0001(12)
C11 0.041(2) 0.067(2) 0.048(2) 0.0128(18) 0.0067(17) 0.0032(17)
C12 0.0379(19) 0.048(2) 0.069(2) -0.0081(18) 0.0106(18) -0.0018(16)
C13 0.049(2) 0.052(2) 0.060(2) -0.0004(18) 0.0212(19) 0.0019(17)
C21 0.065(2) 0.043(2) 0.053(2) 0.0060(16) 0.0293(19) 0.0097(18)
C22 0.088(3) 0.044(2) 0.041(2) -0.0048(16) 0.031(2) -0.0051(18)
C23 0.057(2) 0.046(2) 0.0375(19) 0.0003(15) 0.0040(17) -0.0008(17)
C31 0.053(2) 0.043(2) 0.045(2) 0.0098(15) 0.0052(16) -0.0001(16)
C32 0.0407(19) 0.054(2) 0.0394(19) 0.0060(16) 0.0108(15) -0.0006(15)
C33 0.049(2) 0.0380(17) 0.0337(17) 0.0045(13) 0.0115(15) 0.0026(15)
C41 0.053(2) 0.051(2) 0.051(2) -0.0217(17) 0.0097(18) -0.0139(17)
C42 0.072(3) 0.0357(19) 0.060(2) -0.0133(17) 0.021(2) -0.0107(18)
C43 0.065(2) 0.042(2) 0.053(2) -0.0050(17) 0.0097(19) 0.0164(18)
C44 0.044(2) 0.053(2) 0.059(2) -0.0197(18) 0.0139(17) 0.0087(17)
C45 0.054(2) 0.050(2) 0.051(2) -0.0154(17) 0.0257(18) -0.0040(17)
C46 0.058(2) 0.050(2) 0.0362(18) -0.0127(15) 0.0090(16) -0.0013(17)
C51 0.052(2) 0.045(2) 0.0394(19) 0.0093(15) 0.0128(16) 0.0059(16)
C52 0.0391(18) 0.0469(19) 0.0341(18) 0.0050(14) 0.0070(14) -0.0056(14)
C61 0.0355(17) 0.0454(18) 0.0371(17) 0.0027(14) 0.0123(14) -0.0036(14)
C62 0.083(3) 0.054(2) 0.056(2) 0.0010(18) 0.031(2) -0.011(2)
C63 0.124(4) 0.055(3) 0.089(4) 0.023(2) 0.058(3) -0.001(3)
C64 0.072(3) 0.101(4) 0.059(3) 0.038(3) 0.031(2) 0.016(3)
C65 0.045(2) 0.092(3) 0.0350(19) 0.0044(19) 0.0112(16) -0.001(2)
C66 0.0354(17) 0.059(2) 0.0380(18) 0.0009(15) 0.0093(14) -0.0056(15)
C71 0.0334(16) 0.0438(18) 0.0336(17) 0.0001(13) 0.0060(13) -0.0051(14)
C72 0.0437(19) 0.068(2) 0.0326(18) 0.0007(16) 0.0099(15) 0.0084(17)
C73 0.051(2) 0.079(3) 0.045(2) -0.0062(19) 0.0147(18) 0.014(2)
C74 0.044(2) 0.058(2) 0.055(2) -0.0023(18) 0.0048(17) 0.0132(17)
C75 0.051(2) 0.059(2) 0.042(2) 0.0094(17) 0.0054(17) 0.0055(18)
C76 0.0431(19) 0.056(2) 0.0351(18) 0.0002(15) 0.0121(15) 0.0023(16)
C81 0.055(2) 0.0422(19) 0.0325(17) -0.0006(14) 0.0099(15) -0.0130(16)
C82 0.069(3) 0.050(2) 0.056(2) -0.0086(18) 0.014(2) -0.0071(19)
C83 0.124(4) 0.049(2) 0.067(3) -0.017(2) 0.028(3) -0.008(3)
C84 0.128(5) 0.060(3) 0.054(3) -0.016(2) 0.001(3) -0.031(3)
C85 0.080(3) 0.082(3) 0.066(3) -0.010(2) -0.014(2) -0.028(3)
C86 0.058(2) 0.065(3) 0.053(2) -0.0102(19) 0.0047(19) -0.014(2)

_geom_special_details
;
  All esds (except the esd in the dihedral angle between two l.s. planes)
  are estimated using the full covariance matrix.  The cell esds are taken
  into account individually in the estimation of esds in distances, angles
  and torsion angles; correlations between esds in cell parameters are only
  used when they are defined by crystal symmetry.  An approximate (isotropic)
  treatment of cell esds is used for estimating esds involving l.s. planes.
;

loop_
  _geom_bond_atom_site_label_1
  _geom_bond_atom_site_label_2
  _geom_bond_distance
  _geom_bond_site_symmetry_2
  _geom_bond_publ_flag
Ru1 C13 1.918(4) . ?
Ru1 C12 1.921(4) . ?
Ru1 C11 1.930(4) . ?
Ru1 C1 2.195(3) . ?
Ru1 Ru2 2.7990(4) . ?
Ru1 Ru4 2.8538(4) . ?
Ru1 Ru3 2.8702(4) . ?
Ru1 Ru5 2.9054(3) . ?
Ru2 C21 1.897(4) . ?
Ru2 C22 1.908(4) . ?
Ru2 C23 1.915(4) . ?
Ru2 C1 2.030(3) . ?
Ru2 Ru3 2.8264(4) . ?
Ru2 Ru5 2.8608(4) . ?
Ru3 C31 1.905(4) . ?
Ru3 C33 1.907(4) . ?
Ru3 C32 1.930(4) . ?
Ru3 C1 2.103(3) . ?
Ru3 Ru4 2.8327(4) . ?
Ru4 C1 1.893(3) . ?
Ru4 C43 2.209(3) . ?
Ru4 C45 2.210(3) . ?
Ru4 C44 2.224(3) . ?
Ru4 C46 2.240(3) . ?
Ru4 C42 2.248(3) . ?
Ru4 C41 2.267(3) . ?
Ru4 Ru5 2.8573(4) . ?
Ru5 C52 1.861(3) . ?
Ru5 C51 1.878(3) . ?
Ru5 C1 2.045(3) . ?
Ru5 C11 2.584(4) . ?
Ru5 Sn1 2.6362(3) . ?
Sn1 C71 2.146(3) . ?
Sn1 C61 2.155(3) . ?
Sn1 C81 2.157(3) . ?
O11 C11 1.135(4) . ?
O12 C12 1.128(4) . ?
O13 C13 1.127(4) . ?
O21 C21 1.133(4) . ?
O22 C22 1.130(4) . ?
O23 C23 1.130(4) . ?
O31 C31 1.134(4) . ?
O32 C32 1.121(4) . ?
O33 C33 1.126(4) . ?
O51 C51 1.140(4) . ?
O52 C52 1.143(4) . ?
C41 C46 1.384(5) . ?
C41 C42 1.395(5) . ?
C42 C43 1.413(5) . ?
C43 C44 1.402(5) . ?
C44 C45 1.396(5) . ?
C45 C46 1.411(5) . ?
C61 C66 1.380(4) . ?
C61 C62 1.382(5) . ?
C62 C63 1.380(5) . ?
C63 C64 1.369(6) . ?
C64 C65 1.367(6) . ?
C65 C66 1.389(5) . ?
C71 C72 1.386(4) . ?
C71 C76 1.395(4) . ?
C72 C73 1.387(5) . ?
C73 C74 1.366(5) . ?
C74 C75 1.372(5) . ?
C75 C76 1.382(5) . ?
C81 C82 1.375(5) . ?
C81 C86 1.380(5) . ?
C82 C83 1.383(5) . ?
C83 C84 1.360(7) . ?
C84 C85 1.360(7) . ?
C85 C86 1.386(5) . ?

loop_
  _geom_angle_atom_site_label_1
  _geom_angle_atom_site_label_2
  _geom_angle_atom_site_label_3
  _geom_angle
  _geom_angle_site_symmetry_1
  _geom_angle_site_symmetry_3
  _geom_angle_publ_flag
C13 Ru1 C12 102.77(15) . . ?
C13 Ru1 C11 88.62(16) . . ?
C12 Ru1 C11 89.69(16) . . ?
C13 Ru1 C1 130.76(14) . . ?
C12 Ru1 C1 123.88(13) . . ?
C11 Ru1 C1 105.10(13) . . ?
C13 Ru1 Ru2 84.91(11) . . ?
C12 Ru1 Ru2 164.45(11) . . ?
C11 Ru1 Ru2 104.14(11) . . ?
C1 Ru1 Ru2 46.03(7) . . ?
C13 Ru1 Ru4 170.01(11) . . ?
C12 Ru1 Ru4 83.12(10) . . ?
C11 Ru1 Ru4 99.58(11) . . ?
C1 Ru1 Ru4 41.52(7) . . ?
Ru2 Ru1 Ru4 87.527(10) . . ?
C13 Ru1 Ru3 111.01(11) . . ?
C12 Ru1 Ru3 104.67(11) . . ?
C11 Ru1 Ru3 151.79(11) . . ?
C1 Ru1 Ru3 46.75(7) . . ?
Ru2 Ru1 Ru3 59.793(9) . . ?
Ru4 Ru1 Ru3 59.322(9) . . ?
C13 Ru1 Ru5 121.27(11) . . ?
C12 Ru1 Ru5 123.67(11) . . ?
C11 Ru1 Ru5 60.68(11) . . ?
C1 Ru1 Ru5 44.63(7) . . ?
Ru2 Ru1 Ru5 60.165(9) . . ?
Ru4 Ru1 Ru5 59.479(9) . . ?
Ru3 Ru1 Ru5 91.333(10) . . ?
C21 Ru2 C22 89.09(15) . . ?
C21 Ru2 C23 96.36(16) . . ?
C22 Ru2 C23 96.29(16) . . ?
C21 Ru2 C1 127.44(13) . . ?
C22 Ru2 C1 132.92(13) . . ?
C23 Ru2 C1 106.20(13) . . ?
C21 Ru2 Ru1 103.30(12) . . ?
C22 Ru2 Ru1 96.94(12) . . ?
C23 Ru2 Ru1 156.40(11) . . ?
C1 Ru2 Ru1 51.09(8) . . ?
C21 Ru2 Ru3 163.95(12) . . ?
C22 Ru2 Ru3 88.31(10) . . ?
C23 Ru2 Ru3 99.66(10) . . ?
C1 Ru2 Ru3 47.95(8) . . ?
Ru1 Ru2 Ru3 61.355(9) . . ?
C21 Ru2 Ru5 82.38(10) . . ?
C22 Ru2 Ru5 154.07(13) . . ?
C23 Ru2 Ru5 108.94(11) . . ?
C1 Ru2 Ru5 45.63(8) . . ?
Ru1 Ru2 Ru5 61.762(9) . . ?
Ru3 Ru2 Ru5 93.171(9) . . ?
C31 Ru3 C33 94.39(14) . . ?
C31 Ru3 C32 92.68(14) . . ?
C33 Ru3 C32 90.79(13) . . ?
C31 Ru3 C1 128.27(13) . . ?
C33 Ru3 C1 94.90(12) . . ?
C32 Ru3 C1 137.85(13) . . ?
C31 Ru3 Ru2 166.51(10) . . ?
C33 Ru3 Ru2 98.17(9) . . ?
C32 Ru3 Ru2 92.06(10) . . ?
C1 Ru3 Ru2 45.79(8) . . ?
C31 Ru3 Ru4 86.61(10) . . ?
C33 Ru3 Ru4 94.94(9) . . ?
C32 Ru3 Ru4 174.26(10) . . ?
C1 Ru3 Ru4 41.93(8) . . ?
Ru2 Ru3 Ru4 87.412(9) . . ?
C31 Ru3 Ru1 107.76(10) . . ?
C33 Ru3 Ru1 144.39(9) . . ?
C32 Ru3 Ru1 114.93(10) . . ?
C1 Ru3 Ru1 49.49(7) . . ?
Ru2 Ru3 Ru1 58.852(8) . . ?
Ru4 Ru3 Ru1 60.051(9) . . ?
C1 Ru4 C43 132.84(13) . . ?
C1 Ru4 C45 129.14(12) . . ?
C43 Ru4 C45 65.99(14) . . ?
C1 Ru4 C44 124.14(12) . . ?
C43 Ru4 C44 36.89(13) . . ?
C45 Ru4 C44 36.70(13) . . ?
C1 Ru4 C46 144.83(12) . . ?
C43 Ru4 C46 77.36(13) . . ?
C45 Ru4 C46 36.97(12) . . ?
C44 Ru4 C46 66.13(13) . . ?
C1 Ru4 C42 149.38(13) . . ?
C43 Ru4 C42 36.94(13) . . ?
C45 Ru4 C42 77.83(13) . . ?
C44 Ru4 C42 66.47(14) . . ?
C46 Ru4 C42 64.89(13) . . ?
C1 Ru4 C41 157.88(13) . . ?
C43 Ru4 C41 65.54(14) . . ?
C45 Ru4 C41 65.67(13) . . ?
C44 Ru4 C41 77.80(13) . . ?
C46 Ru4 C41 35.77(12) . . ?
C42 Ru4 C41 35.99(13) . . ?
C1 Ru4 Ru3 47.94(8) . . ?
C43 Ru4 Ru3 95.04(10) . . ?
C45 Ru4 Ru3 149.59(10) . . ?
C44 Ru4 Ru3 114.73(10) . . ?
C46 Ru4 Ru3 165.50(9) . . ?
C42 Ru4 Ru3 101.62(10) . . ?
C41 Ru4 Ru3 129.78(10) . . ?
C1 Ru4 Ru1 50.25(8) . . ?
C43 Ru4 Ru1 143.77(11) . . ?
C45 Ru4 Ru1 146.73(10) . . ?
C44 Ru4 Ru1 174.10(9) . . ?
C46 Ru4 Ru1 119.35(9) . . ?
C42 Ru4 Ru1 117.20(10) . . ?
C41 Ru4 Ru1 107.91(10) . . ?
Ru3 Ru4 Ru1 60.627(9) . . ?
C1 Ru4 Ru5 45.63(8) . . ?
C43 Ru4 Ru5 152.97(11) . . ?
C45 Ru4 Ru5 94.95(9) . . ?
C44 Ru4 Ru5 117.00(10) . . ?
C46 Ru4 Ru5 99.20(9) . . ?
C42 Ru4 Ru5 161.66(10) . . ?
C41 Ru4 Ru5 125.68(10) . . ?
Ru3 Ru4 Ru5 93.114(9) . . ?
Ru1 Ru4 Ru5 61.159(8) . . ?
C52 Ru5 C51 89.49(14) . . ?
C52 Ru5 C1 126.90(13) . . ?
C51 Ru5 C1 142.56(13) . . ?
C52 Ru5 C11 84.70(13) . . ?
C51 Ru5 C11 85.16(13) . . ?
C1 Ru5 C11 89.42(11) . . ?
C52 Ru5 Sn1 87.52(10) . . ?
C51 Ru5 Sn1 82.66(11) . . ?
C1 Ru5 Sn1 104.93(8) . . ?
C11 Ru5 Sn1 165.60(8) . . ?
C52 Ru5 Ru4 85.48(10) . . ?
C51 Ru5 Ru4 169.84(11) . . ?
C1 Ru5 Ru4 41.42(8) . . ?
C11 Ru5 Ru4 85.59(8) . . ?
Sn1 Ru5 Ru4 105.891(10) . . ?
C52 Ru5 Ru2 169.03(10) . . ?
C51 Ru5 Ru2 97.48(10) . . ?
C1 Ru5 Ru2 45.20(8) . . ?
C11 Ru5 Ru2 87.44(8) . . ?
Sn1 Ru5 Ru2 101.718(10) . . ?
Ru4 Ru5 Ru2 86.287(9) . . ?
C52 Ru5 Ru1 111.27(10) . . ?
C51 Ru5 Ru1 114.83(10) . . ?
C1 Ru5 Ru1 48.94(8) . . ?
C11 Ru5 Ru1 40.65(8) . . ?
Sn1 Ru5 Ru1 153.470(11) . . ?
Ru4 Ru5 Ru1 59.363(8) . . ?
Ru2 Ru5 Ru1 58.073(8) . . ?
C71 Sn1 C61 106.74(12) . . ?
C71 Sn1 C81 104.17(13) . . ?
C61 Sn1 C81 103.38(12) . . ?
C71 Sn1 Ru5 112.99(8) . . ?
C61 Sn1 Ru5 112.69(8) . . ?
C81 Sn1 Ru5 115.90(9) . . ?
Ru4 C1 Ru2 170.71(16) . . ?
Ru4 C1 Ru5 92.95(11) . . ?
Ru2 C1 Ru5 89.17(11) . . ?
Ru4 C1 Ru3 90.13(11) . . ?
Ru2 C1 Ru3 86.26(10) . . ?
Ru5 C1 Ru3 169.62(15) . . ?
Ru4 C1 Ru1 88.23(11) . . ?
Ru2 C1 Ru1 82.87(10) . . ?
Ru5 C1 Ru1 86.43(10) . . ?
Ru3 C1 Ru1 83.76(10) . . ?
O11 C11 Ru1 162.0(3) . . ?
O11 C11 Ru5 119.2(3) . . ?
Ru1 C11 Ru5 78.67(12) . . ?
O12 C12 Ru1 177.3(3) . . ?
O13 C13 Ru1 177.7(4) . . ?
O21 C21 Ru2 173.7(3) . . ?
O22 C22 Ru2 175.8(4) . . ?
O23 C23 Ru2 177.9(3) . . ?
O31 C31 Ru3 177.0(3) . . ?
O32 C32 Ru3 175.9(3) . . ?
O33 C33 Ru3 179.9(4) . . ?
C46 C41 C42 120.1(3) . . ?
C46 C41 Ru4 71.06(19) . . ?
C42 C41 Ru4 71.26(19) . . ?
C41 C42 C43 119.3(4) . . ?
C41 C42 Ru4 72.7(2) . . ?
C43 C42 Ru4 70.04(19) . . ?
C44 C43 C42 121.1(3) . . ?
C44 C43 Ru4 72.1(2) . . ?
C42 C43 Ru4 73.0(2) . . ?
C45 C44 C43 118.6(3) . . ?
C45 C44 Ru4 71.12(19) . . ?
C43 C44 Ru4 70.99(19) . . ?
C44 C45 C46 120.3(3) . . ?
C44 C45 Ru4 72.2(2) . . ?
C46 C45 Ru4 72.66(19) . . ?
C41 C46 C45 120.5(3) . . ?
C41 C46 Ru4 73.2(2) . . ?
C45 C46 Ru4 70.36(18) . . ?
O51 C51 Ru5 175.3(3) . . ?
O52 C52 Ru5 176.7(3) . . ?
C66 C61 C62 117.5(3) . . ?
C66 C61 Sn1 123.3(2) . . ?
C62 C61 Sn1 119.2(2) . . ?
C63 C62 C61 121.3(4) . . ?
C64 C63 C62 120.1(4) . . ?
C65 C64 C63 120.1(4) . . ?
C64 C65 C66 119.5(4) . . ?
C61 C66 C65 121.6(4) . . ?
C72 C71 C76 117.6(3) . . ?
C72 C71 Sn1 121.4(2) . . ?
C76 C71 Sn1 121.0(2) . . ?
C71 C72 C73 121.2(3) . . ?
C74 C73 C72 120.2(3) . . ?
C73 C74 C75 119.8(3) . . ?
C74 C75 C76 120.4(3) . . ?
C75 C76 C71 120.9(3) . . ?
C82 C81 C86 117.7(3) . . ?
C82 C81 Sn1 124.3(3) . . ?
C86 C81 Sn1 117.9(3) . . ?
C81 C82 C83 121.0(4) . . ?
C84 C83 C82 120.6(5) . . ?
C85 C84 C83 119.2(4) . . ?
C84 C85 C86 120.7(4) . . ?
C81 C86 C85 120.7(4) . . ?

_diffrn_measured_fraction_theta_max    0.999
_diffrn_reflns_theta_full              26.39
_diffrn_measured_fraction_theta_full   0.999
_refine_diff_density_max    0.618
_refine_diff_density_min   -0.885
_refine_diff_density_rms    0.102

#===END

Compound 6


data_bcmild2s

_audit_creation_method            SHELXL-97
_chemical_name_systematic
;
  ?
;
_chemical_name_common             ?
_chemical_melting_point           ?
_chemical_formula_moiety          ?
_chemical_formula_sum
  'C69 H59 O10 Ru5 Sn2'
_chemical_formula_weight          1790.89

loop_
  _atom_type_symbol
  _atom_type_description
  _atom_type_scat_dispersion_real
  _atom_type_scat_dispersion_imag
  _atom_type_scat_source
  'C'  'C'   0.0033   0.0016
  'International Tables Vol C Tables 4.2.6.8 and 6.1.1.4'
  'H'  'H'   0.0000   0.0000
  'International Tables Vol C Tables 4.2.6.8 and 6.1.1.4'
  'O'  'O'   0.0106   0.0060
  'International Tables Vol C Tables 4.2.6.8 and 6.1.1.4'
  'Ru'  'Ru'  -1.2594   0.8363
  'International Tables Vol C Tables 4.2.6.8 and 6.1.1.4'
  'Sn'  'Sn'  -0.6537   1.4246
  'International Tables Vol C Tables 4.2.6.8 and 6.1.1.4'

_symmetry_cell_setting            triclinic
_symmetry_space_group_name_H-M    P-1

loop_
  _symmetry_equiv_pos_as_xyz
  'x, y, z'
  '-x, -y, -z'

_cell_length_a                    13.8064(8)
_cell_length_b                    15.4231(9)
_cell_length_c                    16.4974(10)
_cell_angle_alpha                 100.5060(10)
_cell_angle_beta                  95.8230(10)
_cell_angle_gamma                 105.2120(10)
_cell_volume                      3291.5(3)
_cell_formula_units_Z             2
_cell_measurement_temperature     190(2)
_cell_measurement_reflns_used     7479
_cell_measurement_theta_min       2.15
_cell_measurement_theta_max       26.40

_exptl_crystal_description        block
_exptl_crystal_colour             red
_exptl_crystal_size_max           0.24
_exptl_crystal_size_mid           0.18
_exptl_crystal_size_min           0.10
_exptl_crystal_density_meas       ?
_exptl_crystal_density_diffrn     1.807
_exptl_crystal_density_method     'not measured'
_exptl_crystal_F_000              1746
_exptl_absorpt_coefficient_mu     1.919
_exptl_absorpt_correction_type    multi-scan
_exptl_absorpt_correction_T_min   0.820
_exptl_absorpt_correction_T_max   0.928
_exptl_absorpt_process_details    '(SADABS, Bruker, 1997)'

_exptl_special_details
;
  ?
;

_diffrn_ambient_temperature       190(2)
_diffrn_radiation_wavelength      0.71073
_diffrn_radiation_type            MoK\a
_diffrn_radiation_source          'fine-focus sealed tube'
_diffrn_radiation_monochromator   graphite
_diffrn_measurement_device_type   'Bruker SMART APEX CCD diffractometer'
_diffrn_measurement_method        'omega scans'
_diffrn_detector_area_resol_mean  ?
_diffrn_standards_number          ?
_diffrn_standards_interval_count  ?
_diffrn_standards_interval_time   ?
_diffrn_standards_decay_%         <1
_diffrn_reflns_number             30244
_diffrn_reflns_av_R_equivalents   0.0340
_diffrn_reflns_av_sigmaI/netI     0.0547
_diffrn_reflns_limit_h_min        -17
_diffrn_reflns_limit_h_max        17
_diffrn_reflns_limit_k_min        -19
_diffrn_reflns_limit_k_max        19
_diffrn_reflns_limit_l_min        -20
_diffrn_reflns_limit_l_max        20
_diffrn_reflns_theta_min          1.27
_diffrn_reflns_theta_max          26.40
_reflns_number_total              13431
_reflns_number_gt                 10271
_reflns_threshold_expression      >2sigma(I)

_computing_data_collection        'SMART NT V5.619 (Bruker, 2000)'
_computing_cell_refinement        'SAINT+ NT V6.02a (Bruker, 1998)'
_computing_data_reduction         'SAINT+ NT V6.02a'
_computing_structure_solution     'SHELXS-97 (Sheldrick, 1990)'
_computing_structure_refinement   'SHELXL-97 (Sheldrick, 1997)'
_computing_molecular_graphics     'SHELXTL V5.1 (Sheldrick, 1997)'
_computing_publication_material   'SHELXTL V5.1'

_refine_special_details
;
  Refinement of F^2^ against ALL reflections.  The weighted R-factor wR and
  goodness of fit S are based on F^2^, conventional R-factors R are based
  on F, with F set to zero for negative F^2^. The threshold expression of
  F^2^ > 2sigma(F^2^) is used only for calculating R-factors(gt) etc. and is
  not relevant to the choice of reflections for refinement.  R-factors based
  on F^2^ are statistically about twice as large as those based on F, and R-
  factors based on ALL data will be even larger.
;

_refine_ls_structure_factor_coef  Fsqd
_refine_ls_matrix_type            full
_refine_ls_weighting_scheme       calc
_refine_ls_weighting_details
; calc
  [0.00000+1.00000exp(0.75(sin\q/\l)^2^)]/
    [\s^2^(Fo^2^)+0.0000+0.0000*P+(0.0467P)^2^+0.0000sin\q/\l]
  where P = 0.33333Fo^2^ + 0.66667Fc^2^
;
_atom_sites_solution_primary      direct
_atom_sites_solution_secondary    difmap
_atom_sites_solution_hydrogens    geom
_refine_ls_hydrogen_treatment     mixed
_refine_ls_extinction_method      none
_refine_ls_extinction_coef        ?
_refine_ls_number_reflns          13431
_refine_ls_number_parameters      760
_refine_ls_number_restraints      3
_refine_ls_R_factor_all           0.0513
_refine_ls_R_factor_gt            0.0366
_refine_ls_wR_factor_ref          0.0911
_refine_ls_wR_factor_gt           0.0824
_refine_ls_goodness_of_fit_ref    1.001
_refine_ls_restrained_S_all       1.002
_refine_ls_shift/su_max           0.001
_refine_ls_shift/su_mean          0.000

loop_
  _atom_site_label
  _atom_site_type_symbol
  _atom_site_fract_x
  _atom_site_fract_y
  _atom_site_fract_z
  _atom_site_U_iso_or_equiv
  _atom_site_adp_type
  _atom_site_occupancy
  _atom_site_symmetry_multiplicity
  _atom_site_calc_flag
  _atom_site_refinement_flags
  _atom_site_disorder_assembly
  _atom_site_disorder_group
Ru1 Ru 0.09993(3) -0.06978(3) 0.80079(2) 0.02371(9) Uani 1 1 d . . .
Ru2 Ru 0.30327(3) 0.01096(3) 0.77172(3) 0.02677(10) Uani 1 1 d . . .
Ru3 Ru 0.13060(3) 0.00693(3) 0.65878(2) 0.02731(10) Uani 1 1 d . . .
Ru4 Ru 0.06782(3) 0.10811(3) 0.79343(2) 0.02518(9) Uani 1 1 d . . .
Ru5 Ru 0.22735(3) 0.09809(3) 0.91224(2) 0.02486(9) Uani 1 1 d . . .
Sn1 Sn 0.06456(2) -0.25159(2) 0.75546(2) 0.02801(9) Uani 1 1 d . . .
Sn2 Sn 0.36088(3) 0.26218(2) 0.96271(2) 0.02980(9) Uani 1 1 d . . .
O11 O 0.1300(3) -0.1080(3) 0.9742(2) 0.0389(9) Uani 1 1 d . . .
O12 O -0.1289(3) -0.1071(3) 0.7915(3) 0.0437(10) Uani 1 1 d . . .
O21 O 0.4502(3) -0.0241(3) 0.9047(3) 0.0522(11) Uani 1 1 d . . .
O22 O 0.3679(3) -0.1186(3) 0.6374(3) 0.0534(11) Uani 1 1 d . . .
O23 O 0.4481(3) 0.1787(3) 0.7333(3) 0.0539(11) Uani 1 1 d . . .
O31 O -0.0846(3) -0.0304(3) 0.5680(2) 0.0481(10) Uani 1 1 d . . .
O32 O 0.1797(4) -0.1206(3) 0.5163(3) 0.0678(13) Uani 1 1 d . . .
O33 O 0.2305(4) 0.1842(3) 0.6062(3) 0.0627(13) Uani 1 1 d . . .
O51 O 0.3487(3) 0.0470(3) 1.0487(2) 0.0469(10) Uani 1 1 d . . .
O52 O 0.0968(3) 0.1416(3) 1.0394(2) 0.0537(11) Uani 1 1 d . . .
C1 C 0.1833(3) 0.0653(3) 0.7866(3) 0.0245(10) Uani 1 1 d . . .
C11 C 0.1197(3) -0.0879(3) 0.9112(3) 0.0299(11) Uani 1 1 d . . .
C12 C -0.0420(4) -0.0890(3) 0.7975(3) 0.0315(11) Uani 1 1 d . . .
C21 C 0.3956(4) -0.0072(4) 0.8575(3) 0.0342(12) Uani 1 1 d . . .
C22 C 0.3421(4) -0.0720(4) 0.6859(4) 0.0372(12) Uani 1 1 d . . .
C23 C 0.3944(4) 0.1167(4) 0.7491(3) 0.0362(12) Uani 1 1 d . . .
C31 C -0.0038(4) -0.0140(4) 0.6027(3) 0.0361(12) Uani 1 1 d . . .
C32 C 0.1642(4) -0.0733(4) 0.5703(4) 0.0420(13) Uani 1 1 d . . .
C33 C 0.1929(4) 0.1177(4) 0.6243(3) 0.0402(13) Uani 1 1 d . . .
C41 C -0.0815(4) 0.1180(4) 0.8339(4) 0.0385(13) Uani 1 1 d . . .
H41 H -0.1269 0.0775 0.8593 0.046 Uiso 1 1 calc R . .
C42 C -0.0925(4) 0.1036(4) 0.7465(4) 0.0422(14) Uani 1 1 d . . .
H42 H -0.1449 0.0532 0.7128 0.051 Uiso 1 1 calc R . .
C43 C -0.0260(5) 0.1636(4) 0.7092(4) 0.0432(14) Uani 1 1 d . . .
H43 H -0.0355 0.1556 0.6502 0.052 Uiso 1 1 calc R . .
C44 C 0.0541(5) 0.2350(4) 0.7580(4) 0.0447(15) Uani 1 1 d . . .
H44 H 0.1008 0.2739 0.7323 0.054 Uiso 1 1 calc R . .
C45 C 0.0656(4) 0.2493(4) 0.8454(4) 0.0384(13) Uani 1 1 d . . .
H45 H 0.1202 0.2978 0.8789 0.046 Uiso 1 1 calc R . .
C46 C -0.0042(4) 0.1914(4) 0.8833(4) 0.0384(13) Uani 1 1 d . . .
H46 H 0.0015 0.2025 0.9424 0.046 Uiso 1 1 calc R . .
C51 C 0.3073(4) 0.0690(3) 0.9963(3) 0.0331(12) Uani 1 1 d . . .
C52 C 0.1467(4) 0.1294(4) 0.9899(3) 0.0351(12) Uani 1 1 d . . .
C61 C 0.0060(4) -0.3238(3) 0.8478(3) 0.0307(11) Uani 1 1 d . . .
C62 C -0.0977(4) -0.3530(4) 0.8460(4) 0.0450(14) Uani 1 1 d . . .
H62 H -0.1411 -0.3416 0.8032 0.054 Uiso 1 1 calc R . .
C63 C -0.1403(5) -0.3982(4) 0.9041(5) 0.0580(18) Uani 1 1 d . . .
H63 H -0.2121 -0.4177 0.9007 0.070 Uiso 1 1 calc R . .
C64 C -0.0794(5) -0.4151(4) 0.9671(4) 0.0535(17) Uani 1 1 d . . .
H64 H -0.1082 -0.4455 1.0079 0.064 Uiso 1 1 calc R . .
C65 C 0.0245(5) -0.3872(4) 0.9696(4) 0.0453(14) Uani 1 1 d . . .
H65 H 0.0676 -0.3993 1.0122 0.054 Uiso 1 1 calc R . .
C66 C 0.0667(4) -0.3418(4) 0.9111(4) 0.0411(13) Uani 1 1 d . . .
H66 H 0.1385 -0.3226 0.9143 0.049 Uiso 1 1 calc R . .
C71 C -0.0481(4) -0.3147(3) 0.6452(3) 0.0347(12) Uani 1 1 d . . .
C72 C -0.0959(5) -0.2672(4) 0.6017(4) 0.0586(18) Uani 1 1 d . . .
H72 H -0.0793 -0.2022 0.6196 0.070 Uiso 1 1 calc R . .
C73 C -0.1690(5) -0.3117(5) 0.5312(5) 0.071(2) Uani 1 1 d . . .
H73 H -0.2010 -0.2767 0.5017 0.085 Uiso 1 1 calc R . .
C74 C -0.1943(5) -0.4033(5) 0.5048(4) 0.0616(19) Uani 1 1 d . . .
H74 H -0.2445 -0.4335 0.4571 0.074 Uiso 1 1 calc R . .
C75 C -0.1475(7) -0.4525(5) 0.5468(5) 0.093(3) Uani 1 1 d . . .
H75 H -0.1641 -0.5174 0.5284 0.111 Uiso 1 1 calc R . .
C76 C -0.0751(6) -0.4077(4) 0.6168(5) 0.074(2) Uani 1 1 d . . .
H76 H -0.0432 -0.4432 0.6460 0.089 Uiso 1 1 calc R . .
C81 C 0.2025(4) -0.2859(3) 0.7315(3) 0.0348(12) Uani 1 1 d . . .
C82 C 0.2116(4) -0.3325(4) 0.6548(4) 0.0439(14) Uani 1 1 d . . .
H82 H 0.1548 -0.3535 0.6114 0.053 Uiso 1 1 calc R . .
C83 C 0.3035(5) -0.3494(4) 0.6398(4) 0.0572(18) Uani 1 1 d . . .
H83 H 0.3087 -0.3818 0.5864 0.069 Uiso 1 1 calc R . .
C84 C 0.3861(5) -0.3193(4) 0.7020(5) 0.0562(18) Uani 1 1 d . . .
H84 H 0.4486 -0.3303 0.6914 0.067 Uiso 1 1 calc R . .
C85 C 0.3785(4) -0.2736(4) 0.7790(4) 0.0510(16) Uani 1 1 d . . .
H85 H 0.4355 -0.2537 0.8224 0.061 Uiso 1 1 calc R . .
C86 C 0.2874(4) -0.2563(4) 0.7939(4) 0.0373(12) Uani 1 1 d . . .
H86 H 0.2829 -0.2238 0.8475 0.045 Uiso 1 1 calc R . .
C91 C 0.3745(4) 0.3195(4) 1.0941(3) 0.0331(12) Uani 1 1 d . . .
C92 C 0.3262(4) 0.2714(4) 1.1489(3) 0.0360(12) Uani 1 1 d . . .
H92 H 0.2890 0.2084 1.1291 0.043 Uiso 1 1 calc R . .
C93 C 0.3305(4) 0.3124(4) 1.2316(3) 0.0423(13) Uani 1 1 d . . .
H93 H 0.2968 0.2778 1.2679 0.051 Uiso 1 1 calc R . .
C94 C 0.3841(5) 0.4043(5) 1.2614(4) 0.0532(16) Uani 1 1 d . . .
H94 H 0.3850 0.4337 1.3175 0.064 Uiso 1 1 calc R . .
C95 C 0.4358(5) 0.4523(4) 1.2096(4) 0.0536(16) Uani 1 1 d . . .
H95 H 0.4749 0.5146 1.2305 0.064 Uiso 1 1 calc R . .
C96 C 0.4320(4) 0.4112(4) 1.1269(4) 0.0449(14) Uani 1 1 d . . .
H96 H 0.4687 0.4456 1.0918 0.054 Uiso 1 1 calc R . .
C101 C 0.3179(4) 0.3458(4) 0.8110(4) 0.0422(13) Uani 1 1 d . . .
H101 H 0.3255 0.2895 0.7818 0.051 Uiso 1 1 calc R . .
C102 C 0.2966(5) 0.4083(4) 0.7659(4) 0.0519(16) Uani 1 1 d . . .
H102 H 0.2898 0.3945 0.7068 0.062 Uiso 1 1 calc R . .
C103 C 0.2856(5) 0.4897(4) 0.8074(4) 0.0526(17) Uani 1 1 d . . .
H103 H 0.2704 0.5324 0.7769 0.063 Uiso 1 1 calc R . .
C104 C 0.2967(4) 0.5094(4) 0.8925(4) 0.0502(16) Uani 1 1 d . . .
H104 H 0.2899 0.5663 0.9212 0.060 Uiso 1 1 calc R . .
C105 C 0.3176(4) 0.4471(4) 0.9376(4) 0.0383(13) Uani 1 1 d . . .
H105 H 0.3248 0.4616 0.9968 0.046 Uiso 1 1 calc R . .
C106 C 0.3282(4) 0.3636(3) 0.8971(3) 0.0318(11) Uani 1 1 d . . .
C111 C 0.5149(4) 0.2658(3) 0.9417(3) 0.0331(12) Uani 1 1 d . . .
C112 C 0.5622(4) 0.2052(4) 0.9690(4) 0.0422(13) Uani 1 1 d . . .
H112 H 0.5278 0.1618 0.9982 0.051 Uiso 1 1 calc R . .
C113 C 0.6611(5) 0.2079(5) 0.9536(4) 0.0532(16) Uani 1 1 d . . .
H113 H 0.6934 0.1662 0.9724 0.064 Uiso 1 1 calc R . .
C114 C 0.7109(5) 0.2702(5) 0.9117(4) 0.0556(17) Uani 1 1 d . . .
H114 H 0.7776 0.2715 0.9011 0.067 Uiso 1 1 calc R . .
C115 C 0.6646(5) 0.3317(4) 0.8845(4) 0.0519(16) Uani 1 1 d . . .
H115 H 0.6990 0.3750 0.8553 0.062 Uiso 1 1 calc R . .
C116 C 0.5676(4) 0.3291(4) 0.9005(4) 0.0430(14) Uani 1 1 d . . .
H116 H 0.5363 0.3719 0.8827 0.052 Uiso 1 1 calc R . .
C121 C 0.8440(7) 0.3445(6) 0.7056(6) 0.091(3) Uani 1 1 d . . .
H121 H 0.7792 0.3198 0.7200 0.109 Uiso 1 1 calc R . .
C122 C 0.8615(7) 0.3193(5) 0.6247(5) 0.081(2) Uani 1 1 d . . .
H122 H 0.8082 0.2786 0.5831 0.097 Uiso 1 1 calc R . .
C123 C 0.9546(6) 0.3527(5) 0.6053(5) 0.0656(19) Uani 1 1 d . . .
H123 H 0.9675 0.3348 0.5501 0.079 Uiso 1 1 calc R . .
C124 C 1.0298(6) 0.4120(5) 0.6643(5) 0.0641(19) Uani 1 1 d . . .
H124 H 1.0951 0.4356 0.6502 0.077 Uiso 1 1 calc R . .
C125 C 1.0124(7) 0.4382(5) 0.7444(5) 0.067(2) Uani 1 1 d . . .
H125 H 1.0656 0.4798 0.7854 0.080 Uiso 1 1 calc R . .
C126 C 0.9199(7) 0.4050(6) 0.7647(5) 0.077(2) Uani 1 1 d . . .
H126 H 0.9075 0.4235 0.8198 0.092 Uiso 1 1 calc R . .
C131 C 0.6447(8) 0.9055(7) 0.6490(8) 0.106(3) Uani 1 1 d . . .
H131 H 0.6475 0.8442 0.6313 0.127 Uiso 1 1 calc R . .
C132 C 0.6483(8) 0.9592(9) 0.5929(7) 0.108(3) Uani 1 1 d . . .
H132 H 0.6534 0.9366 0.5364 0.129 Uiso 1 1 calc R . .
C133 C 0.6445(7) 1.0488(8) 0.6204(7) 0.097(3) Uani 1 1 d . . .
H133 H 0.6463 1.0888 0.5828 0.117 Uiso 1 1 calc R . .
C134 C 0.6380(6) 1.0783(6) 0.7023(7) 0.086(3) Uani 1 1 d . . .
H134 H 0.6369 1.1398 0.7223 0.103 Uiso 1 1 calc R . .
C135 C 0.6331(5) 1.0209(7) 0.7544(6) 0.079(2) Uani 1 1 d . . .
H135 H 0.6265 1.0420 0.8108 0.094 Uiso 1 1 calc R . .
C136 C 0.6372(7) 0.9356(7) 0.7295(7) 0.092(3) Uani 1 1 d . . .
H136 H 0.6350 0.8962 0.7677 0.110 Uiso 1 1 calc R . .
C141 C 0.4508(16) 0.7214(14) 0.4279(12) 0.264(10) Uiso 1 1 d D . .
H14G H 0.4567 0.7427 0.4884 0.396 Uiso 1 1 calc R . .
H14H H 0.3798 0.6884 0.4044 0.396 Uiso 1 1 calc R . .
H14I H 0.4736 0.7745 0.4025 0.396 Uiso 1 1 calc R . .
C142 C 0.5107(19) 0.6630(17) 0.4115(13) 0.307(12) Uiso 1 1 d D . .
H14E H 0.5757 0.6954 0.3959 0.369 Uiso 1 1 calc R . .
H14F H 0.4749 0.6091 0.3659 0.369 Uiso 1 1 calc R . .
C143 C 0.5272(14) 0.6357(10) 0.4890(12) 0.236(9) Uiso 1 1 d D . .
H14A H 0.5038 0.6753 0.5323 0.283 Uiso 1 1 calc R . .
H14B H 0.6013 0.6473 0.5055 0.283 Uiso 1 1 calc R . .
C144 C 0.4750 0.5362 0.4882 0.305(12) Uiso 1 1 d D . .
H14C H 0.4378 0.5092 0.4308 0.366 Uiso 1 1 calc R . .
H14D H 0.4224 0.5379 0.5245 0.366 Uiso 1 1 calc R . .
H1 H 0.223(5) -0.093(5) 0.780(4) 0.09(2) Uiso 1 1 d . . .
H2 H 0.078(4) -0.102(4) 0.692(3) 0.054(17) Uiso 1 1 d . . .

loop_
  _atom_site_aniso_label
  _atom_site_aniso_U_11
  _atom_site_aniso_U_22
  _atom_site_aniso_U_33
  _atom_site_aniso_U_23
  _atom_site_aniso_U_13
  _atom_site_aniso_U_12
Ru1 0.02159(19) 0.0242(2) 0.0277(2) 0.00892(16) 0.00211(15) 0.00905(15)
Ru2 0.02212(19) 0.0278(2) 0.0331(2) 0.00835(17) 0.00471(16) 0.01061(16)
Ru3 0.0294(2) 0.0296(2) 0.0254(2) 0.00862(17) 0.00328(17) 0.01118(17)
Ru4 0.02364(19) 0.0259(2) 0.0296(2) 0.00878(16) 0.00237(16) 0.01216(16)
Ru5 0.02159(19) 0.0273(2) 0.0271(2) 0.00775(16) 0.00136(16) 0.00917(16)
Sn1 0.02594(17) 0.02516(17) 0.03372(19) 0.00755(14) -0.00037(14) 0.00982(14)
Sn2 0.02553(17) 0.02865(18) 0.0362(2) 0.00917(15) 0.00299(15) 0.00870(14)
O11 0.040(2) 0.044(2) 0.033(2) 0.0194(18) 0.0011(17) 0.0076(18)
O12 0.024(2) 0.049(2) 0.063(3) 0.023(2) 0.0062(18) 0.0123(18)
O21 0.043(2) 0.064(3) 0.055(3) 0.009(2) -0.004(2) 0.031(2)
O22 0.059(3) 0.050(3) 0.055(3) -0.001(2) 0.019(2) 0.026(2)
O23 0.046(2) 0.043(2) 0.071(3) 0.017(2) 0.022(2) 0.003(2)
O31 0.037(2) 0.064(3) 0.040(2) 0.010(2) -0.0059(19) 0.015(2)
O32 0.087(4) 0.072(3) 0.047(3) -0.004(2) 0.015(3) 0.038(3)
O33 0.072(3) 0.054(3) 0.064(3) 0.037(2) 0.006(2) 0.007(2)
O51 0.046(2) 0.057(3) 0.044(2) 0.018(2) -0.0023(19) 0.024(2)
O52 0.037(2) 0.096(4) 0.036(2) 0.014(2) 0.0112(19) 0.029(2)
C1 0.026(2) 0.026(2) 0.023(2) 0.0088(19) 0.0026(19) 0.010(2)
C11 0.020(2) 0.031(3) 0.039(3) 0.007(2) 0.004(2) 0.008(2)
C12 0.033(3) 0.030(3) 0.034(3) 0.012(2) 0.003(2) 0.010(2)
C21 0.026(3) 0.036(3) 0.041(3) 0.006(2) 0.006(2) 0.011(2)
C22 0.034(3) 0.036(3) 0.044(3) 0.012(3) 0.009(3) 0.009(2)
C23 0.030(3) 0.038(3) 0.042(3) 0.007(2) 0.012(2) 0.012(2)
C31 0.045(3) 0.039(3) 0.031(3) 0.015(2) 0.008(3) 0.017(3)
C32 0.042(3) 0.046(3) 0.038(3) 0.008(3) 0.001(3) 0.015(3)
C33 0.042(3) 0.045(3) 0.035(3) 0.017(3) 0.002(3) 0.010(3)
C41 0.031(3) 0.042(3) 0.050(3) 0.013(3) 0.013(3) 0.019(3)
C42 0.026(3) 0.044(3) 0.054(4) -0.003(3) -0.009(3) 0.021(3)
C43 0.056(4) 0.053(4) 0.035(3) 0.015(3) 0.003(3) 0.038(3)
C44 0.050(4) 0.042(3) 0.062(4) 0.029(3) 0.019(3) 0.032(3)
C45 0.037(3) 0.028(3) 0.052(4) 0.003(2) 0.000(3) 0.019(2)
C46 0.042(3) 0.044(3) 0.040(3) 0.011(3) 0.007(3) 0.030(3)
C51 0.033(3) 0.035(3) 0.033(3) 0.010(2) 0.003(2) 0.013(2)
C52 0.025(3) 0.047(3) 0.034(3) 0.011(2) -0.003(2) 0.012(2)
C61 0.035(3) 0.021(2) 0.042(3) 0.009(2) 0.010(2) 0.015(2)
C62 0.036(3) 0.045(3) 0.066(4) 0.025(3) 0.015(3) 0.020(3)
C63 0.044(4) 0.061(4) 0.089(5) 0.035(4) 0.034(4) 0.027(3)
C64 0.078(5) 0.039(3) 0.057(4) 0.021(3) 0.035(4) 0.023(3)
C65 0.060(4) 0.040(3) 0.038(3) 0.016(3) 0.004(3) 0.013(3)
C66 0.041(3) 0.033(3) 0.049(3) 0.011(3) 0.005(3) 0.009(2)
C71 0.035(3) 0.031(3) 0.038(3) 0.008(2) -0.001(2) 0.013(2)
C72 0.059(4) 0.040(4) 0.066(4) 0.021(3) -0.021(3) 0.001(3)
C73 0.068(5) 0.062(5) 0.074(5) 0.035(4) -0.026(4) 0.005(4)
C74 0.056(4) 0.056(4) 0.055(4) 0.001(3) -0.024(3) 0.006(3)
C75 0.110(7) 0.040(4) 0.098(6) -0.011(4) -0.062(5) 0.015(4)
C76 0.092(6) 0.038(4) 0.081(5) 0.006(3) -0.038(4) 0.023(4)
C81 0.030(3) 0.027(3) 0.048(3) 0.009(2) 0.002(2) 0.010(2)
C82 0.038(3) 0.042(3) 0.048(4) -0.002(3) 0.002(3) 0.016(3)
C83 0.047(4) 0.052(4) 0.066(4) -0.011(3) 0.015(3) 0.016(3)
C84 0.036(3) 0.049(4) 0.090(5) 0.008(4) 0.016(3) 0.025(3)
C85 0.035(3) 0.051(4) 0.071(5) 0.020(3) 0.002(3) 0.018(3)
C86 0.034(3) 0.037(3) 0.041(3) 0.008(2) 0.000(2) 0.013(2)
C91 0.026(3) 0.036(3) 0.039(3) 0.009(2) 0.002(2) 0.012(2)
C92 0.027(3) 0.037(3) 0.042(3) 0.007(2) -0.004(2) 0.009(2)
C93 0.034(3) 0.055(4) 0.038(3) 0.009(3) 0.002(2) 0.015(3)
C94 0.049(4) 0.060(4) 0.043(4) -0.006(3) -0.007(3) 0.020(3)
C95 0.047(4) 0.046(4) 0.055(4) -0.003(3) -0.008(3) 0.005(3)
C96 0.030(3) 0.039(3) 0.055(4) 0.005(3) -0.004(3) 0.001(3)
C101 0.042(3) 0.041(3) 0.047(3) 0.012(3) 0.006(3) 0.015(3)
C102 0.053(4) 0.057(4) 0.051(4) 0.024(3) 0.002(3) 0.019(3)
C103 0.045(4) 0.046(4) 0.072(5) 0.033(3) 0.004(3) 0.011(3)
C104 0.041(3) 0.034(3) 0.079(5) 0.019(3) 0.007(3) 0.014(3)
C105 0.031(3) 0.036(3) 0.049(3) 0.013(3) 0.007(2) 0.009(2)
C106 0.024(2) 0.030(3) 0.043(3) 0.014(2) 0.004(2) 0.007(2)
C111 0.026(3) 0.031(3) 0.036(3) 0.000(2) 0.000(2) 0.005(2)
C112 0.030(3) 0.045(3) 0.050(4) 0.010(3) 0.001(3) 0.010(3)
C113 0.040(3) 0.062(4) 0.061(4) 0.006(3) -0.001(3) 0.027(3)
C114 0.030(3) 0.068(5) 0.060(4) -0.001(3) 0.009(3) 0.008(3)
C115 0.041(3) 0.052(4) 0.054(4) 0.007(3) 0.014(3) 0.001(3)
C116 0.032(3) 0.040(3) 0.053(4) 0.010(3) 0.006(3) 0.004(2)
C121 0.091(7) 0.086(6) 0.100(7) 0.008(5) 0.046(6) 0.030(5)
C122 0.085(6) 0.059(5) 0.090(6) -0.009(4) 0.005(5) 0.027(5)
C123 0.086(6) 0.060(5) 0.063(5) 0.015(4) 0.018(4) 0.038(4)
C124 0.071(5) 0.055(4) 0.080(5) 0.024(4) 0.012(4) 0.034(4)
C125 0.085(6) 0.050(4) 0.071(5) 0.007(4) -0.002(4) 0.041(4)
C126 0.107(7) 0.068(5) 0.069(5) 0.005(4) 0.012(5) 0.055(5)
C131 0.114(8) 0.078(7) 0.121(9) 0.012(7) 0.010(7) 0.032(6)
C132 0.102(8) 0.135(10) 0.086(7) 0.018(7) 0.025(6) 0.036(7)
C133 0.070(6) 0.118(9) 0.113(8) 0.065(7) 0.008(6) 0.019(6)
C134 0.045(4) 0.081(6) 0.133(9) 0.021(6) 0.022(5) 0.020(4)
C135 0.044(4) 0.108(7) 0.077(6) 0.018(6) 0.010(4) 0.010(5)
C136 0.081(6) 0.098(8) 0.098(8) 0.039(6) -0.001(6) 0.022(6)

_geom_special_details
;
  All esds (except the esd in the dihedral angle between two l.s. planes)
  are estimated using the full covariance matrix.  The cell esds are taken
  into account individually in the estimation of esds in distances, angles
  and torsion angles; correlations between esds in cell parameters are only
  used when they are defined by crystal symmetry.  An approximate (isotropic)
  treatment of cell esds is used for estimating esds involving l.s. planes.
;

loop_
  _geom_bond_atom_site_label_1
  _geom_bond_atom_site_label_2
  _geom_bond_distance
  _geom_bond_site_symmetry_2
  _geom_bond_publ_flag
Ru1 C12 1.897(5) . ?
Ru1 C11 1.897(5) . ?
Ru1 C1 2.167(5) . ?
Ru1 Sn1 2.6652(5) . ?
Ru1 Ru3 2.8314(6) . ?
Ru1 Ru2 2.8842(5) . ?
Ru1 Ru5 2.8976(6) . ?
Ru1 Ru4 2.9133(5) . ?
Ru2 C23 1.903(6) . ?
Ru2 C21 1.916(5) . ?
Ru2 C22 1.945(6) . ?
Ru2 C1 2.060(4) . ?
Ru2 Ru3 2.8526(6) . ?
Ru2 Ru5 2.8939(6) . ?
Ru3 C31 1.905(6) . ?
Ru3 C32 1.913(6) . ?
Ru3 C33 1.915(6) . ?
Ru3 C1 2.107(5) . ?
Ru3 Ru4 2.8208(6) . ?
Ru4 C1 1.885(4) . ?
Ru4 C44 2.190(5) . ?
Ru4 C45 2.199(5) . ?
Ru4 C43 2.234(5) . ?
Ru4 C42 2.248(5) . ?
Ru4 C46 2.261(5) . ?
Ru4 C41 2.264(5) . ?
Ru4 Ru5 2.8513(5) . ?
Ru5 C52 1.861(6) . ?
Ru5 C51 1.876(5) . ?
Ru5 C1 2.031(4) . ?
Ru5 Sn2 2.6397(5) . ?
Sn1 C61 2.147(5) . ?
Sn1 C71 2.159(5) . ?
Sn1 C81 2.161(5) . ?
Sn2 C91 2.156(5) . ?
Sn2 C106 2.170(5) . ?
Sn2 C111 2.178(5) . ?
O11 C11 1.142(6) . ?
O12 C12 1.148(6) . ?
O21 C21 1.141(6) . ?
O22 C22 1.125(6) . ?
O23 C23 1.137(6) . ?
O31 C31 1.143(6) . ?
O32 C32 1.120(7) . ?
O33 C33 1.128(6) . ?
O51 C51 1.139(6) . ?
O52 C52 1.140(6) . ?
C41 C46 1.392(8) . ?
C41 C42 1.404(8) . ?
C42 C43 1.397(8) . ?
C43 C44 1.394(8) . ?
C44 C45 1.403(8) . ?
C45 C46 1.412(8) . ?
C61 C62 1.379(7) . ?
C61 C66 1.385(7) . ?
C62 C63 1.375(8) . ?
C63 C64 1.376(9) . ?
C64 C65 1.379(9) . ?
C65 C66 1.382(8) . ?
C71 C72 1.354(8) . ?
C71 C76 1.363(8) . ?
C72 C73 1.396(9) . ?
C73 C74 1.340(9) . ?
C74 C75 1.353(9) . ?
C75 C76 1.386(9) . ?
C81 C82 1.371(7) . ?
C81 C86 1.395(7) . ?
C82 C83 1.397(8) . ?
C83 C84 1.371(9) . ?
C84 C85 1.365(9) . ?
C85 C86 1.389(8) . ?
C91 C92 1.386(7) . ?
C91 C96 1.403(7) . ?
C92 C93 1.384(7) . ?
C93 C94 1.385(8) . ?
C94 C95 1.366(9) . ?
C95 C96 1.386(8) . ?
C101 C106 1.382(7) . ?
C101 C102 1.389(8) . ?
C102 C103 1.370(9) . ?
C103 C104 1.366(9) . ?
C104 C105 1.387(8) . ?
C105 C106 1.390(7) . ?
C111 C116 1.383(7) . ?
C111 C112 1.384(7) . ?
C112 C113 1.405(8) . ?
C113 C114 1.368(9) . ?
C114 C115 1.386(9) . ?
C115 C116 1.383(8) . ?
C121 C126 1.366(12) . ?
C121 C122 1.384(11) . ?
C122 C123 1.348(11) . ?
C123 C124 1.354(10) . ?
C124 C125 1.373(10) . ?
C125 C126 1.346(11) . ?
C131 C132 1.346(13) . ?
C131 C136 1.348(13) . ?
C132 C133 1.390(14) . ?
C133 C134 1.364(12) . ?
C134 C135 1.335(12) . ?
C135 C136 1.323(12) . ?
C141 C142 1.384(16) . ?
C142 C143 1.433(16) . ?
C143 C144 1.511(14) . ?
C144 C144 1.5455 2_666 ?

loop_
  _geom_angle_atom_site_label_1
  _geom_angle_atom_site_label_2
  _geom_angle_atom_site_label_3
  _geom_angle
  _geom_angle_site_symmetry_1
  _geom_angle_site_symmetry_3
  _geom_angle_publ_flag
C12 Ru1 C11 93.4(2) . . ?
C12 Ru1 C1 114.94(19) . . ?
C11 Ru1 C1 114.00(19) . . ?
C12 Ru1 Sn1 88.52(15) . . ?
C11 Ru1 Sn1 84.80(15) . . ?
C1 Ru1 Sn1 147.59(12) . . ?
C12 Ru1 Ru3 100.64(15) . . ?
C11 Ru1 Ru3 160.54(15) . . ?
C1 Ru1 Ru3 47.60(12) . . ?
Sn1 Ru1 Ru3 108.780(17) . . ?
C12 Ru1 Ru2 158.20(15) . . ?
C11 Ru1 Ru2 103.56(14) . . ?
C1 Ru1 Ru2 45.44(12) . . ?
Sn1 Ru1 Ru2 106.358(16) . . ?
Ru3 Ru1 Ru2 59.872(13) . . ?
C12 Ru1 Ru5 115.28(15) . . ?
C11 Ru1 Ru5 69.70(15) . . ?
C1 Ru1 Ru5 44.43(12) . . ?
Sn1 Ru1 Ru5 145.316(18) . . ?
Ru3 Ru1 Ru5 91.988(16) . . ?
Ru2 Ru1 Ru5 60.069(13) . . ?
C12 Ru1 Ru4 75.00(15) . . ?
C11 Ru1 Ru4 113.15(15) . . ?
C1 Ru1 Ru4 40.29(12) . . ?
Sn1 Ru1 Ru4 155.906(18) . . ?
Ru3 Ru1 Ru4 58.795(13) . . ?
Ru2 Ru1 Ru4 85.671(15) . . ?
Ru5 Ru1 Ru4 58.771(13) . . ?
C23 Ru2 C21 96.4(2) . . ?
C23 Ru2 C22 92.4(2) . . ?
C21 Ru2 C22 92.0(2) . . ?
C23 Ru2 C1 97.1(2) . . ?
C21 Ru2 C1 127.5(2) . . ?
C22 Ru2 C1 137.6(2) . . ?
C23 Ru2 Ru3 97.06(16) . . ?
C21 Ru2 Ru3 166.21(15) . . ?
C22 Ru2 Ru3 90.44(16) . . ?
C1 Ru2 Ru3 47.48(13) . . ?
C23 Ru2 Ru1 145.52(16) . . ?
C21 Ru2 Ru1 107.43(15) . . ?
C22 Ru2 Ru1 110.86(16) . . ?
C1 Ru2 Ru1 48.55(13) . . ?
Ru3 Ru2 Ru1 59.146(14) . . ?
C23 Ru2 Ru5 99.65(16) . . ?
C21 Ru2 Ru5 83.14(15) . . ?
C22 Ru2 Ru5 167.45(16) . . ?
C1 Ru2 Ru5 44.57(12) . . ?
Ru3 Ru2 Ru5 91.631(16) . . ?
Ru1 Ru2 Ru5 60.195(13) . . ?
C31 Ru3 C32 93.2(2) . . ?
C31 Ru3 C33 97.7(2) . . ?
C32 Ru3 C33 95.2(2) . . ?
C31 Ru3 C1 125.8(2) . . ?
C32 Ru3 C1 138.2(2) . . ?
C33 Ru3 C1 93.8(2) . . ?
C31 Ru3 Ru4 85.02(16) . . ?
C32 Ru3 Ru4 173.84(18) . . ?
C33 Ru3 Ru4 90.87(17) . . ?
C1 Ru3 Ru4 41.92(12) . . ?
C31 Ru3 Ru1 103.64(15) . . ?
C32 Ru3 Ru1 112.87(17) . . ?
C33 Ru3 Ru1 143.26(17) . . ?
C1 Ru3 Ru1 49.43(12) . . ?
Ru4 Ru3 Ru1 62.051(14) . . ?
C31 Ru3 Ru2 164.58(15) . . ?
C32 Ru3 Ru2 92.32(17) . . ?
C33 Ru3 Ru2 96.16(16) . . ?
C1 Ru3 Ru2 46.11(12) . . ?
Ru4 Ru3 Ru2 88.016(16) . . ?
Ru1 Ru3 Ru2 60.982(14) . . ?
C1 Ru4 C44 124.1(2) . . ?
C1 Ru4 C45 126.9(2) . . ?
C44 Ru4 C45 37.3(2) . . ?
C1 Ru4 C43 135.3(2) . . ?
C44 Ru4 C43 36.7(2) . . ?
C45 Ru4 C43 66.2(2) . . ?
C1 Ru4 C42 152.1(2) . . ?
C44 Ru4 C42 66.2(2) . . ?
C45 Ru4 C42 78.0(2) . . ?
C43 Ru4 C42 36.3(2) . . ?
C1 Ru4 C46 142.0(2) . . ?
C44 Ru4 C46 66.3(2) . . ?
C45 Ru4 C46 36.9(2) . . ?
C43 Ru4 C46 77.0(2) . . ?
C42 Ru4 C46 65.0(2) . . ?
C1 Ru4 C41 157.2(2) . . ?
C44 Ru4 C41 78.0(2) . . ?
C45 Ru4 C41 65.8(2) . . ?
C43 Ru4 C41 65.2(2) . . ?
C42 Ru4 C41 36.3(2) . . ?
C46 Ru4 C41 35.83(19) . . ?
C1 Ru4 Ru3 48.31(14) . . ?
C44 Ru4 Ru3 107.03(16) . . ?
C45 Ru4 Ru3 140.57(15) . . ?
C43 Ru4 Ru3 92.87(15) . . ?
C42 Ru4 Ru3 105.17(15) . . ?
C46 Ru4 Ru3 169.53(14) . . ?
C41 Ru4 Ru3 136.83(15) . . ?
C1 Ru4 Ru5 45.31(14) . . ?
C44 Ru4 Ru5 124.64(17) . . ?
C45 Ru4 Ru5 98.47(14) . . ?
C43 Ru4 Ru5 161.28(17) . . ?
C42 Ru4 Ru5 155.11(16) . . ?
C46 Ru4 Ru5 97.27(14) . . ?
C41 Ru4 Ru5 119.74(15) . . ?
Ru3 Ru4 Ru5 93.190(16) . . ?
C1 Ru4 Ru1 48.04(14) . . ?
C44 Ru4 Ru1 166.18(16) . . ?
C45 Ru4 Ru1 155.22(15) . . ?
C43 Ru4 Ru1 136.98(16) . . ?
C42 Ru4 Ru1 115.25(15) . . ?
C46 Ru4 Ru1 127.29(14) . . ?
C41 Ru4 Ru1 111.59(14) . . ?
Ru3 Ru4 Ru1 59.153(13) . . ?
Ru5 Ru4 Ru1 60.339(13) . . ?
C52 Ru5 C51 89.1(2) . . ?
C52 Ru5 C1 124.7(2) . . ?
C51 Ru5 C1 141.2(2) . . ?
C52 Ru5 Sn2 90.82(17) . . ?
C51 Ru5 Sn2 82.89(16) . . ?
C1 Ru5 Sn2 111.97(13) . . ?
C52 Ru5 Ru4 84.15(15) . . ?
C51 Ru5 Ru4 166.12(16) . . ?
C1 Ru5 Ru4 41.28(13) . . ?
Sn2 Ru5 Ru4 109.241(17) . . ?
C52 Ru5 Ru2 164.65(16) . . ?
C51 Ru5 Ru2 97.18(16) . . ?
C1 Ru5 Ru2 45.38(13) . . ?
Sn2 Ru5 Ru2 103.828(17) . . ?
Ru4 Ru5 Ru2 86.639(16) . . ?
C52 Ru5 Ru1 104.96(16) . . ?
C51 Ru5 Ru1 109.65(16) . . ?
C1 Ru5 Ru1 48.34(13) . . ?
Sn2 Ru5 Ru1 159.656(19) . . ?
Ru4 Ru5 Ru1 60.890(13) . . ?
Ru2 Ru5 Ru1 59.736(14) . . ?
C61 Sn1 C71 103.7(2) . . ?
C61 Sn1 C81 107.16(19) . . ?
C71 Sn1 C81 107.6(2) . . ?
C61 Sn1 Ru1 113.49(13) . . ?
C71 Sn1 Ru1 113.65(13) . . ?
C81 Sn1 Ru1 110.68(13) . . ?
C91 Sn2 C106 106.7(2) . . ?
C91 Sn2 C111 105.15(19) . . ?
C106 Sn2 C111 102.66(19) . . ?
C91 Sn2 Ru5 113.62(14) . . ?
C106 Sn2 Ru5 113.34(13) . . ?
C111 Sn2 Ru5 114.35(13) . . ?
Ru4 C1 Ru5 93.40(19) . . ?
Ru4 C1 Ru2 175.7(3) . . ?
Ru5 C1 Ru2 90.05(17) . . ?
Ru4 C1 Ru3 89.77(18) . . ?
Ru5 C1 Ru3 169.8(2) . . ?
Ru2 C1 Ru3 86.41(17) . . ?
Ru4 C1 Ru1 91.68(18) . . ?
Ru5 C1 Ru1 87.23(17) . . ?
Ru2 C1 Ru1 86.01(16) . . ?
Ru3 C1 Ru1 82.97(16) . . ?
O11 C11 Ru1 173.1(4) . . ?
O12 C12 Ru1 174.8(5) . . ?
O21 C21 Ru2 174.9(5) . . ?
O22 C22 Ru2 177.7(5) . . ?
O23 C23 Ru2 178.1(5) . . ?
O31 C31 Ru3 177.1(5) . . ?
O32 C32 Ru3 176.7(5) . . ?
O33 C33 Ru3 178.0(5) . . ?
C46 C41 C42 120.2(5) . . ?
C46 C41 Ru4 72.0(3) . . ?
C42 C41 Ru4 71.2(3) . . ?
C43 C42 C41 119.8(5) . . ?
C43 C42 Ru4 71.3(3) . . ?
C41 C42 Ru4 72.5(3) . . ?
C44 C43 C42 120.4(5) . . ?
C44 C43 Ru4 69.9(3) . . ?
C42 C43 Ru4 72.4(3) . . ?
C43 C44 C45 119.8(5) . . ?
C43 C44 Ru4 73.4(3) . . ?
C45 C44 Ru4 71.7(3) . . ?
C44 C45 C46 119.8(5) . . ?
C44 C45 Ru4 71.0(3) . . ?
C46 C45 Ru4 74.0(3) . . ?
C41 C46 C45 119.8(5) . . ?
C41 C46 Ru4 72.2(3) . . ?
C45 C46 Ru4 69.2(3) . . ?
O51 C51 Ru5 174.5(5) . . ?
O52 C52 Ru5 174.2(5) . . ?
C62 C61 C66 117.2(5) . . ?
C62 C61 Sn1 119.0(4) . . ?
C66 C61 Sn1 123.8(4) . . ?
C63 C62 C61 122.1(6) . . ?
C62 C63 C64 120.3(6) . . ?
C63 C64 C65 118.6(5) . . ?
C64 C65 C66 120.7(6) . . ?
C65 C66 C61 121.1(5) . . ?
C72 C71 C76 116.7(5) . . ?
C72 C71 Sn1 123.9(4) . . ?
C76 C71 Sn1 119.4(4) . . ?
C71 C72 C73 121.5(6) . . ?
C74 C73 C72 120.6(6) . . ?
C73 C74 C75 119.2(6) . . ?
C74 C75 C76 119.8(7) . . ?
C71 C76 C75 122.2(6) . . ?
C82 C81 C86 118.0(5) . . ?
C82 C81 Sn1 122.1(4) . . ?
C86 C81 Sn1 119.8(4) . . ?
C81 C82 C83 120.9(6) . . ?
C84 C83 C82 120.1(6) . . ?
C85 C84 C83 120.1(6) . . ?
C84 C85 C86 119.8(6) . . ?
C85 C86 C81 121.1(5) . . ?
C92 C91 C96 117.1(5) . . ?
C92 C91 Sn2 123.5(4) . . ?
C96 C91 Sn2 119.4(4) . . ?
C93 C92 C91 121.9(5) . . ?
C92 C93 C94 119.8(6) . . ?
C95 C94 C93 119.5(6) . . ?
C94 C95 C96 120.8(6) . . ?
C95 C96 C91 120.9(6) . . ?
C106 C101 C102 121.7(6) . . ?
C103 C102 C101 119.6(6) . . ?
C104 C103 C102 119.9(6) . . ?
C103 C104 C105 120.6(6) . . ?
C104 C105 C106 120.7(6) . . ?
C101 C106 C105 117.5(5) . . ?
C101 C106 Sn2 119.4(4) . . ?
C105 C106 Sn2 123.1(4) . . ?
C116 C111 C112 118.6(5) . . ?
C116 C111 Sn2 120.3(4) . . ?
C112 C111 Sn2 121.0(4) . . ?
C111 C112 C113 120.1(6) . . ?
C114 C113 C112 120.2(6) . . ?
C113 C114 C115 120.3(6) . . ?
C116 C115 C114 119.2(6) . . ?
C115 C116 C111 121.6(6) . . ?
C126 C121 C122 120.2(9) . . ?
C123 C122 C121 119.5(8) . . ?
C122 C123 C124 120.0(8) . . ?
C123 C124 C125 120.7(8) . . ?
C126 C125 C124 119.9(8) . . ?
C125 C126 C121 119.7(8) . . ?
C132 C131 C136 122.4(10) . . ?
C131 C132 C133 117.8(10) . . ?
C134 C133 C132 118.9(9) . . ?
C135 C134 C133 120.2(9) . . ?
C136 C135 C134 121.7(9) . . ?
C135 C136 C131 119.0(10) . . ?
C141 C142 C143 103.3(19) . . ?
C142 C143 C144 115.4(17) . . ?
C143 C144 C144 127.2(7) . 2_666 ?

_diffrn_measured_fraction_theta_max    0.994
_diffrn_reflns_theta_full              26.40
_diffrn_measured_fraction_theta_full   0.994
_refine_diff_density_max    1.333
_refine_diff_density_min   -0.883
_refine_diff_density_rms    0.163

#===END

Compound 7


data_bclogos

_audit_creation_method            SHELXL-97
_chemical_name_systematic
;
  ?
;
_chemical_name_common             ?
_chemical_melting_point           ?
_chemical_formula_moiety          ?
_chemical_formula_sum
  'C69.25 H60.50 Cl0.50 O8 Ru5 Sn4'
_chemical_formula_weight          2018.51

loop_
  _atom_type_symbol
  _atom_type_description
  _atom_type_scat_dispersion_real
  _atom_type_scat_dispersion_imag
  _atom_type_scat_source
  'C'  'C'   0.0033   0.0016
  'International Tables Vol C Tables 4.2.6.8 and 6.1.1.4'
  'H'  'H'   0.0000   0.0000
  'International Tables Vol C Tables 4.2.6.8 and 6.1.1.4'
  'O'  'O'   0.0106   0.0060
  'International Tables Vol C Tables 4.2.6.8 and 6.1.1.4'
  'Ru'  'Ru'  -1.2594   0.8363
  'International Tables Vol C Tables 4.2.6.8 and 6.1.1.4'
  'Sn'  'Sn'  -0.6537   1.4246
  'International Tables Vol C Tables 4.2.6.8 and 6.1.1.4'
  'Cl'  'Cl'   0.1484   0.1585
  'International Tables Vol C Tables 4.2.6.8 and 6.1.1.4'

_symmetry_cell_setting            monoclinic
_symmetry_space_group_name_H-M    P2(1)/c

loop_
  _symmetry_equiv_pos_as_xyz
  'x, y, z'
  '-x, y+1/2, -z+1/2'
  '-x, -y, -z'
  'x, -y-1/2, z-1/2'

_cell_length_a                    14.6107(11)
_cell_length_b                    18.7109(14)
_cell_length_c                    25.3931(19)
_cell_angle_alpha                 90.00
_cell_angle_beta                  102.8120(10)
_cell_angle_gamma                 90.00
_cell_volume                      6769.1(9)
_cell_formula_units_Z             4
_cell_measurement_temperature     190(2)
_cell_measurement_reflns_used     7349
_cell_measurement_theta_min       2.21
_cell_measurement_theta_max       26.40

_exptl_crystal_description        plate
_exptl_crystal_colour             red
_exptl_crystal_size_max           0.36
_exptl_crystal_size_mid           0.18
_exptl_crystal_size_min           0.05
_exptl_crystal_density_meas       ?
_exptl_crystal_density_diffrn     1.981
_exptl_crystal_density_method     'not measured'
_exptl_crystal_F_000              3874
_exptl_absorpt_coefficient_mu     2.604
_exptl_absorpt_correction_type    SADABS
_exptl_absorpt_correction_T_min   0.571
_exptl_absorpt_correction_T_max   0.694
_exptl_absorpt_process_details    '(SADABS, Bruker, 1997)'

_exptl_special_details
;
  ?
;

_diffrn_ambient_temperature       190(2)
_diffrn_radiation_wavelength      0.71073
_diffrn_radiation_type            MoK\a
_diffrn_radiation_source          'fine-focus sealed tube'
_diffrn_radiation_monochromator   graphite
_diffrn_measurement_device_type   'Bruker SMART APEX CCD diffractometer'
_diffrn_measurement_method        'omega scans'
_diffrn_detector_area_resol_mean  ?
_diffrn_standards_number          ?
_diffrn_standards_interval_count  ?
_diffrn_standards_interval_time   ?
_diffrn_standards_decay_%         <1
_diffrn_reflns_number             46674
_diffrn_reflns_av_R_equivalents   0.0465
_diffrn_reflns_av_sigmaI/netI     0.0412
_diffrn_reflns_limit_h_min        -17
_diffrn_reflns_limit_h_max        17
_diffrn_reflns_limit_k_min        -22
_diffrn_reflns_limit_k_max        22
_diffrn_reflns_limit_l_min        -30
_diffrn_reflns_limit_l_max        30
_diffrn_reflns_theta_min          1.43
_diffrn_reflns_theta_max          25.03
_reflns_number_total              11965
_reflns_number_gt                 9944
_reflns_threshold_expression      >2sigma(I)

_computing_data_collection        'SMART NT V5.619 (Bruker, 2000)'
_computing_cell_refinement        'SAINT+ NT V6.02a (Bruker, 1998)'
_computing_data_reduction         'SAINT+ NT V6.02a'
_computing_structure_solution     'SHELXS-97 (Sheldrick, 1990)'
_computing_structure_refinement   'SHELXL-97 (Sheldrick, 1997)'
_computing_molecular_graphics     'SHELXTL V5.1 (Sheldrick, 1997)'
_computing_publication_material   'SHELXTL V5.1'

_refine_special_details
;
  Refinement of F^2^ against ALL reflections.  The weighted R-factor wR and
  goodness of fit S are based on F^2^, conventional R-factors R are based
  on F, with F set to zero for negative F^2^. The threshold expression of
  F^2^ > 2sigma(F^2^) is used only for calculating R-factors(gt) etc. and is
  not relevant to the choice of reflections for refinement.  R-factors based
  on F^2^ are statistically about twice as large as those based on F, and R-
  factors based on ALL data will be even larger.
;

_refine_ls_structure_factor_coef  Fsqd
_refine_ls_matrix_type            full
_refine_ls_weighting_scheme       calc
_refine_ls_weighting_details
  'calc w=1/[\s^2^(Fo^2^)+(0.0666P)^2^+63.9082P] where P=(Fo^2^+2Fc^2^)/3'
_atom_sites_solution_primary      direct
_atom_sites_solution_secondary    difmap
_atom_sites_solution_hydrogens    geom
_refine_ls_hydrogen_treatment     mixed
_refine_ls_extinction_method      none
_refine_ls_extinction_coef        ?
_refine_ls_number_reflns          11965
_refine_ls_number_parameters      789
_refine_ls_number_restraints      13
_refine_ls_R_factor_all           0.0727
_refine_ls_R_factor_gt            0.0595
_refine_ls_wR_factor_ref          0.1550
_refine_ls_wR_factor_gt           0.1488
_refine_ls_goodness_of_fit_ref    1.143
_refine_ls_restrained_S_all       1.143
_refine_ls_shift/su_max           0.108
_refine_ls_shift/su_mean          0.002

loop_
  _atom_site_label
  _atom_site_type_symbol
  _atom_site_fract_x
  _atom_site_fract_y
  _atom_site_fract_z
  _atom_site_U_iso_or_equiv
  _atom_site_adp_type
  _atom_site_occupancy
  _atom_site_symmetry_multiplicity
  _atom_site_calc_flag
  _atom_site_refinement_flags
  _atom_site_disorder_assembly
  _atom_site_disorder_group
Ru1 Ru 0.10056(5) 0.31401(4) 0.26294(3) 0.02243(17) Uani 1 1 d . . .
Ru2 Ru 0.29435(5) 0.31805(5) 0.29098(3) 0.0303(2) Uani 1 1 d . . .
Ru3 Ru 0.19111(5) 0.38941(4) 0.19555(3) 0.02530(18) Uani 1 1 d . . .
Ru4 Ru 0.07858(5) 0.46230(4) 0.25983(3) 0.02257(17) Uani 1 1 d . . .
Ru5 Ru 0.18191(5) 0.38926(4) 0.35529(3) 0.02211(17) Uani 1 1 d . . .
Sn1 Sn 0.31092(5) 0.29209(4) 0.39336(3) 0.03813(19) Uani 1 1 d . . .
Sn2 Sn 0.33864(6) 0.30479(5) 0.19769(4) 0.0521(2) Uani 1 1 d . . .
Sn3 Sn 0.04778(5) 0.47166(4) 0.15409(3) 0.02796(17) Uani 1 1 d . . .
Sn4 Sn 0.03653(4) 0.47210(3) 0.35489(2) 0.02465(16) Uani 1 1 d . . .
O21 O 0.3300(8) 0.1579(5) 0.2913(5) 0.088(4) Uani 1 1 d . . .
O22 O 0.4925(7) 0.3772(7) 0.3256(5) 0.089(4) Uani 1 1 d . . .
O31 O 0.1095(6) 0.3031(5) 0.0952(3) 0.055(2) Uani 1 1 d . . .
O32 O 0.3022(6) 0.4932(5) 0.1423(4) 0.070(3) Uani 1 1 d . . .
O41 O -0.1282(5) 0.5035(5) 0.2293(3) 0.046(2) Uani 1 1 d . . .
O42 O 0.1497(6) 0.6158(4) 0.2689(3) 0.047(2) Uani 1 1 d . . .
O51 O 0.0959(6) 0.3173(4) 0.4399(3) 0.048(2) Uani 1 1 d . . .
O52 O 0.2945(6) 0.4938(5) 0.4344(4) 0.066(3) Uani 1 1 d . . .
C1 C 0.1938(6) 0.3966(5) 0.2763(3) 0.024(2) Uani 1 1 d . . .
C2 C -0.0161(7) 0.2680(5) 0.2006(4) 0.032(2) Uani 1 1 d . . .
H2 H -0.0383 0.2858 0.1650 0.039 Uiso 1 1 calc R . .
C3 C -0.0555(7) 0.2913(5) 0.2417(4) 0.032(2) Uani 1 1 d . . .
H3 H -0.1082 0.3224 0.2340 0.039 Uiso 1 1 calc R . .
C4 C -0.0185(7) 0.2695(5) 0.2956(4) 0.029(2) Uani 1 1 d . . .
H4 H -0.0432 0.2882 0.3244 0.035 Uiso 1 1 calc R . .
C5 C 0.0560(7) 0.2195(5) 0.3059(4) 0.036(2) Uani 1 1 d . . .
H5 H 0.0820 0.2049 0.3419 0.043 Uiso 1 1 calc R . .
C6 C 0.0925(8) 0.1908(6) 0.2629(5) 0.038(2) Uani 1 1 d . . .
H6 H 0.1391 0.1545 0.2693 0.046 Uiso 1 1 calc R . .
C7 C 0.0581(7) 0.2174(5) 0.2113(4) 0.034(2) Uani 1 1 d . . .
H7 H 0.0847 0.2014 0.1825 0.040 Uiso 1 1 calc R . .
C21 C 0.3180(8) 0.2182(7) 0.2920(5) 0.049(3) Uani 1 1 d . . .
C22 C 0.4186(8) 0.3548(7) 0.3117(5) 0.047(3) Uani 1 1 d . . .
C31 C 0.1400(7) 0.3361(6) 0.1334(4) 0.034(2) Uani 1 1 d . . .
C32 C 0.2633(7) 0.4553(6) 0.1653(5) 0.040(3) Uani 1 1 d . . .
C41 C -0.0518(8) 0.4859(6) 0.2407(4) 0.033(2) Uani 1 1 d . . .
C42 C 0.1223(7) 0.5579(5) 0.2658(4) 0.029(2) Uani 1 1 d . . .
C51 C 0.1285(7) 0.3437(5) 0.4077(4) 0.029(2) Uani 1 1 d . . .
C52 C 0.2540(7) 0.4548(6) 0.4031(5) 0.038(3) Uani 1 1 d . . .
C61 C 0.2767(8) 0.1965(7) 0.4315(5) 0.049(3) Uani 1 1 d . . .
C62 C 0.2679(9) 0.1267(7) 0.4086(7) 0.063(4) Uani 1 1 d . . .
H62 H 0.2685 0.1191 0.3717 0.076 Uiso 1 1 calc R . .
C63 C 0.2582(10) 0.0695(8) 0.4428(7) 0.071(4) Uani 1 1 d . . .
H63 H 0.2523 0.0224 0.4286 0.086 Uiso 1 1 calc R . .
C64 C 0.2572(12) 0.0794(10) 0.4949(7) 0.078(5) Uani 1 1 d . . .
H64 H 0.2535 0.0390 0.5171 0.093 Uiso 1 1 calc R . .
C65 C 0.2610(11) 0.1423(10) 0.5156(7) 0.079(5) Uani 1 1 d . . .
H65 H 0.2559 0.1481 0.5520 0.094 Uiso 1 1 calc R . .
C66 C 0.2724(11) 0.2014(8) 0.4854(6) 0.067(4) Uani 1 1 d . . .
H66 H 0.2776 0.2471 0.5021 0.081 Uiso 1 1 calc R . .
C71 C 0.4396(8) 0.3212(6) 0.4487(5) 0.043(3) Uani 1 1 d . . .
C72 C 0.4870(9) 0.2724(8) 0.4859(6) 0.060(4) Uani 1 1 d . . .
H72 H 0.4632 0.2253 0.4869 0.072 Uiso 1 1 calc R . .
C73 C 0.5682(10) 0.2920(8) 0.5212(6) 0.068(4) Uani 1 1 d . . .
H73 H 0.5990 0.2583 0.5471 0.082 Uiso 1 1 calc R . .
C74 C 0.6054(9) 0.3572(8) 0.5202(6) 0.061(4) Uani 1 1 d . . .
H74 H 0.6634 0.3686 0.5441 0.074 Uiso 1 1 calc R . .
C75 C 0.5603(9) 0.4070(8) 0.4850(6) 0.060(4) Uani 1 1 d . . .
H75 H 0.5847 0.4541 0.4853 0.072 Uiso 1 1 calc R . .
C76 C 0.4774(8) 0.3884(7) 0.4483(5) 0.049(3) Uani 1 1 d . . .
H76 H 0.4468 0.4227 0.4228 0.059 Uiso 1 1 calc R . .
C81 C 0.3223(10) 0.2087(8) 0.1496(6) 0.060(4) Uani 1 1 d . . .
C82 C 0.2765(11) 0.1481(9) 0.1625(7) 0.073(4) Uani 1 1 d . . .
H82 H 0.2492 0.1487 0.1931 0.088 Uiso 1 1 calc R . .
C83 C 0.2706(11) 0.0888(9) 0.1323(7) 0.076(4) Uani 1 1 d . . .
H83 H 0.2409 0.0477 0.1427 0.091 Uiso 1 1 calc R . .
C84 C 0.3054(15) 0.0863(11) 0.0878(9) 0.114(8) Uani 1 1 d . . .
H84 H 0.2937 0.0456 0.0650 0.136 Uiso 1 1 calc R . .
C85 C 0.3554(17) 0.1392(11) 0.0755(8) 0.114(8) Uani 1 1 d . . .
H85 H 0.3865 0.1350 0.0465 0.137 Uiso 1 1 calc R . .
C86 C 0.3623(15) 0.2025(10) 0.1062(7) 0.095(6) Uani 1 1 d . . .
H86 H 0.3957 0.2420 0.0963 0.113 Uiso 1 1 calc R . .
C91 C 0.4729(11) 0.3457(9) 0.1938(6) 0.073(4) Uani 1 1 d . . .
C92 C 0.5446(11) 0.2983(11) 0.1825(8) 0.093(6) Uani 1 1 d . . .
H92 H 0.5281 0.2499 0.1739 0.112 Uiso 1 1 calc R . .
C93 C 0.6324(14) 0.3188(17) 0.1836(10) 0.137(10) Uani 1 1 d . . .
H93 H 0.6781 0.2867 0.1760 0.164 Uiso 1 1 calc R . .
C94 C 0.6538(13) 0.3935(15) 0.1971(9) 0.122(9) Uani 1 1 d . . .
H94 H 0.7158 0.4102 0.1988 0.147 Uiso 1 1 calc R . .
C95 C 0.5899(11) 0.4395(11) 0.2073(7) 0.084(5) Uani 1 1 d . . .
H95 H 0.6050 0.4884 0.2144 0.101 Uiso 1 1 calc R . .
C96 C 0.5006(12) 0.4137(9) 0.2072(8) 0.084(5) Uani 1 1 d . . .
H96 H 0.4565 0.4455 0.2171 0.100 Uiso 1 1 calc R . .
C101 C -0.0735(7) 0.4268(5) 0.1000(4) 0.031(2) Uani 1 1 d . . .
C102 C -0.1494(7) 0.3980(5) 0.1174(4) 0.035(2) Uani 1 1 d . . .
H102 H -0.1476 0.3962 0.1550 0.043 Uiso 1 1 calc R . .
C103 C -0.2282(8) 0.3718(7) 0.0810(5) 0.048(3) Uani 1 1 d . . .
H103 H -0.2799 0.3528 0.0936 0.058 Uiso 1 1 calc R . .
C104 C -0.2295(8) 0.3739(6) 0.0265(5) 0.044(3) Uani 1 1 d . . .
H104 H -0.2822 0.3556 0.0011 0.053 Uiso 1 1 calc R . .
C105 C -0.1543(8) 0.4025(6) 0.0085(5) 0.039(3) Uani 1 1 d . . .
H105 H -0.1556 0.4043 -0.0290 0.047 Uiso 1 1 calc R . .
C106 C -0.0784(7) 0.4280(6) 0.0451(4) 0.034(2) Uani 1 1 d . . .
H106 H -0.0272 0.4473 0.0324 0.041 Uiso 1 1 calc R . .
C111 C 0.0629(7) 0.5750(5) 0.1204(4) 0.031(2) Uani 1 1 d . . .
C112 C -0.0071(8) 0.6016(5) 0.0796(4) 0.035(2) Uani 1 1 d . . .
H112 H -0.0601 0.5728 0.0646 0.042 Uiso 1 1 calc R . .
C113 C -0.0001(9) 0.6701(6) 0.0603(4) 0.041(3) Uani 1 1 d . . .
H113 H -0.0494 0.6884 0.0327 0.049 Uiso 1 1 calc R . .
C114 C 0.0766(9) 0.7122(6) 0.0802(5) 0.044(3) Uani 1 1 d . . .
H114 H 0.0808 0.7587 0.0660 0.053 Uiso 1 1 calc R . .
C115 C 0.1491(8) 0.6860(6) 0.1219(4) 0.041(3) Uani 1 1 d . . .
H115 H 0.2025 0.7145 0.1366 0.049 Uiso 1 1 calc R . .
C116 C 0.1405(8) 0.6184(6) 0.1406(4) 0.035(2) Uani 1 1 d . . .
H116 H 0.1894 0.6001 0.1685 0.042 Uiso 1 1 calc R . .
C121 C -0.0908(7) 0.4295(5) 0.3731(4) 0.031(2) Uani 1 1 d . . .
C122 C -0.1653(7) 0.4071(6) 0.3350(4) 0.037(2) Uani 1 1 d . . .
H122 H -0.1624 0.4088 0.2980 0.045 Uiso 1 1 calc R . .
C123 C -0.2471(8) 0.3814(6) 0.3494(5) 0.045(3) Uani 1 1 d . . .
H123 H -0.2984 0.3648 0.3223 0.054 Uiso 1 1 calc R . .
C124 C -0.2523(8) 0.3805(6) 0.4030(5) 0.047(3) Uani 1 1 d . . .
H124 H -0.3076 0.3643 0.4131 0.056 Uiso 1 1 calc R . .
C125 C -0.1776(9) 0.4029(6) 0.4411(5) 0.048(3) Uani 1 1 d . . .
H125 H -0.1811 0.4023 0.4780 0.058 Uiso 1 1 calc R . .
C126 C -0.0966(7) 0.4267(6) 0.4275(4) 0.039(3) Uani 1 1 d . . .
H126 H -0.0446 0.4412 0.4550 0.047 Uiso 1 1 calc R . .
C131 C 0.0547(7) 0.5733(5) 0.3957(4) 0.030(2) Uani 1 1 d . . .
C132 C -0.0120(8) 0.6009(5) 0.4210(4) 0.035(2) Uani 1 1 d . . .
H132 H -0.0663 0.5734 0.4221 0.042 Uiso 1 1 calc R . .
C133 C -0.0014(9) 0.6676(6) 0.4446(4) 0.040(3) Uani 1 1 d . . .
H133 H -0.0478 0.6853 0.4621 0.048 Uiso 1 1 calc R . .
C134 C 0.0762(9) 0.7087(6) 0.4430(4) 0.044(3) Uani 1 1 d . . .
H134 H 0.0829 0.7548 0.4590 0.053 Uiso 1 1 calc R . .
C135 C 0.1428(8) 0.6833(6) 0.4185(4) 0.036(2) Uani 1 1 d . . .
H135 H 0.1962 0.7117 0.4174 0.043 Uiso 1 1 calc R . .
C136 C 0.1335(7) 0.6160(5) 0.3951(4) 0.033(2) Uani 1 1 d . . .
H136 H 0.1811 0.5986 0.3783 0.040 Uiso 1 1 calc R . .
C1S C 0.398(2) 0.5652(19) 0.3398(13) 0.194(15) Uani 1 1 d D A 1
H1S1 H 0.3706 0.6080 0.3522 0.291 Uiso 1 1 calc R A 1
H1S2 H 0.4457 0.5453 0.3697 0.291 Uiso 1 1 calc R A 1
H1S3 H 0.3493 0.5296 0.3272 0.291 Uiso 1 1 calc R A 1
C2S C 0.439(3) 0.5829(18) 0.2989(14) 0.24(2) Uani 1 1 d D A 1
H2S1 H 0.4602 0.5373 0.2857 0.284 Uiso 1 1 calc R A 1
H2S2 H 0.4974 0.6092 0.3157 0.284 Uiso 1 1 calc R A 1
C3S C 0.400(3) 0.621(2) 0.2540(12) 0.33(4) Uani 1 1 d D A 1
H3S1 H 0.3534 0.5863 0.2339 0.393 Uiso 1 1 calc R A 1
H3S2 H 0.3619 0.6565 0.2685 0.393 Uiso 1 1 calc R A 1
C4S C 0.425(3) 0.657(3) 0.2134(14) 0.36(4) Uani 1 1 d D A 1
H4S1 H 0.4896 0.6394 0.2161 0.432 Uiso 1 1 calc R A 1
H4S2 H 0.4336 0.7060 0.2291 0.432 Uiso 1 1 calc R A 1
C5S C 0.399(3) 0.673(3) 0.1599(14) 0.29(3) Uani 1 1 d D A 1
H5S1 H 0.3551 0.6330 0.1465 0.349 Uiso 1 1 calc R A 1
H5S2 H 0.3581 0.7148 0.1599 0.349 Uiso 1 1 calc R A 1
C6S C 0.436(3) 0.686(3) 0.1165(14) 0.26(2) Uani 1 1 d D A 1
H6S1 H 0.4889 0.7192 0.1268 0.385 Uiso 1 1 calc R A 1
H6S2 H 0.3881 0.7071 0.0876 0.385 Uiso 1 1 calc R A 1
H6S3 H 0.4583 0.6411 0.1037 0.385 Uiso 1 1 calc R A 1
C11S C 0.510(5) 0.023(3) 0.494(2) 0.075(18) Uiso 0.25 1 d PD B -2
H11A H 0.5747 0.0418 0.4997 0.090 Uiso 0.25 1 calc PR B -2
H11B H 0.4649 0.0615 0.4795 0.090 Uiso 0.25 1 calc PR B -2
Cl1S Cl 0.495(6) -0.050(4) 0.449(3) 0.38(4) Uiso 0.25 1 d PD B -2
Cl2S Cl 0.487(7) -0.014(6) 0.553(2) 0.42(5) Uiso 0.25 1 d PD B -2

loop_
  _atom_site_aniso_label
  _atom_site_aniso_U_11
  _atom_site_aniso_U_22
  _atom_site_aniso_U_33
  _atom_site_aniso_U_23
  _atom_site_aniso_U_13
  _atom_site_aniso_U_12
Ru1 0.0228(4) 0.0238(4) 0.0218(4) -0.0022(3) 0.0072(3) -0.0040(3)
Ru2 0.0229(4) 0.0328(5) 0.0370(5) -0.0040(4) 0.0107(3) -0.0008(3)
Ru3 0.0257(4) 0.0286(4) 0.0239(4) -0.0026(3) 0.0103(3) -0.0046(3)
Ru4 0.0238(4) 0.0230(4) 0.0221(4) -0.0005(3) 0.0077(3) -0.0026(3)
Ru5 0.0205(4) 0.0239(4) 0.0221(4) -0.0026(3) 0.0050(3) -0.0010(3)
Sn1 0.0306(4) 0.0371(4) 0.0451(4) -0.0026(3) 0.0051(3) -0.0001(3)
Sn2 0.0427(5) 0.0591(6) 0.0571(5) -0.0051(4) 0.0168(4) -0.0008(4)
Sn3 0.0310(4) 0.0296(4) 0.0244(3) 0.0012(3) 0.0085(3) -0.0065(3)
Sn4 0.0251(3) 0.0264(4) 0.0239(3) -0.0020(3) 0.0087(3) 0.0012(3)
O21 0.091(8) 0.040(6) 0.146(11) 0.000(6) 0.050(8) 0.028(5)
O22 0.034(5) 0.118(10) 0.111(9) 0.011(8) 0.009(6) -0.025(6)
O31 0.055(5) 0.064(6) 0.042(5) -0.026(4) 0.003(4) 0.000(4)
O32 0.051(5) 0.063(6) 0.110(8) 0.023(6) 0.048(6) -0.002(5)
O41 0.026(4) 0.063(6) 0.050(5) 0.009(4) 0.008(3) 0.009(4)
O42 0.068(6) 0.031(5) 0.045(5) -0.006(4) 0.019(4) -0.015(4)
O51 0.063(5) 0.050(5) 0.040(4) 0.016(4) 0.029(4) 0.005(4)
O52 0.050(5) 0.041(5) 0.088(7) -0.027(5) -0.025(5) 0.000(4)
C1 0.029(5) 0.027(5) 0.019(4) -0.007(4) 0.009(4) -0.008(4)
C2 0.036(5) 0.032(6) 0.028(5) -0.005(4) 0.007(4) -0.021(5)
C3 0.025(5) 0.030(5) 0.041(6) 0.000(5) 0.007(4) -0.012(4)
C4 0.033(5) 0.031(6) 0.026(5) -0.002(4) 0.011(4) -0.010(4)
C5 0.041(6) 0.028(6) 0.037(6) 0.002(5) 0.006(5) -0.011(5)
C6 0.037(6) 0.023(5) 0.056(7) -0.001(5) 0.014(5) -0.005(4)
C7 0.030(5) 0.030(6) 0.046(6) -0.017(5) 0.018(5) -0.011(4)
C21 0.034(6) 0.047(8) 0.074(9) -0.005(6) 0.027(6) 0.003(5)
C22 0.034(7) 0.053(8) 0.053(7) -0.005(6) 0.007(5) 0.003(6)
C31 0.033(6) 0.034(6) 0.041(6) 0.000(5) 0.019(5) 0.003(5)
C32 0.028(5) 0.042(7) 0.057(7) -0.004(5) 0.021(5) -0.001(5)
C41 0.040(6) 0.034(6) 0.028(5) 0.005(4) 0.011(5) -0.008(5)
C42 0.039(6) 0.030(6) 0.023(5) 0.000(4) 0.015(4) 0.001(5)
C51 0.031(5) 0.031(5) 0.025(5) -0.007(4) 0.004(4) 0.008(4)
C52 0.033(6) 0.029(6) 0.047(6) -0.007(5) -0.004(5) 0.007(5)
C61 0.039(6) 0.045(7) 0.062(8) 0.003(6) 0.011(6) 0.002(5)
C62 0.052(8) 0.048(8) 0.086(10) 0.002(7) 0.006(7) -0.009(6)
C63 0.062(9) 0.044(8) 0.101(13) 0.002(8) 0.003(9) -0.004(7)
C64 0.081(11) 0.073(12) 0.075(11) 0.007(9) 0.009(9) -0.021(9)
C65 0.070(10) 0.082(12) 0.086(12) 0.018(10) 0.022(9) 0.005(9)
C66 0.076(10) 0.056(9) 0.078(10) 0.014(8) 0.035(8) 0.009(8)
C71 0.035(6) 0.044(7) 0.049(7) -0.009(5) 0.008(5) 0.002(5)
C72 0.050(8) 0.053(8) 0.074(9) 0.007(7) 0.009(7) 0.009(6)
C73 0.052(8) 0.063(10) 0.074(10) -0.002(8) -0.018(7) 0.008(7)
C74 0.041(7) 0.062(9) 0.069(9) -0.014(7) -0.015(6) 0.010(7)
C75 0.044(7) 0.054(8) 0.074(9) -0.017(7) -0.004(7) -0.006(6)
C76 0.040(6) 0.051(8) 0.053(7) -0.009(6) 0.005(6) -0.003(6)
C81 0.058(8) 0.062(9) 0.064(9) -0.011(7) 0.022(7) 0.004(7)
C82 0.068(10) 0.071(11) 0.087(11) -0.005(9) 0.032(9) -0.010(8)
C83 0.075(11) 0.061(10) 0.093(12) -0.003(9) 0.021(9) -0.002(8)
C84 0.137(18) 0.083(13) 0.151(19) -0.050(13) 0.095(16) -0.048(13)
C85 0.17(2) 0.093(15) 0.114(16) -0.016(12) 0.097(16) -0.010(14)
C86 0.147(18) 0.081(12) 0.069(11) -0.028(9) 0.055(12) -0.019(12)
C91 0.062(9) 0.088(12) 0.077(10) -0.011(9) 0.035(8) -0.019(9)
C92 0.052(9) 0.116(15) 0.121(15) -0.026(12) 0.041(10) 0.005(9)
C93 0.074(13) 0.22(3) 0.14(2) -0.05(2) 0.064(14) -0.049(16)
C94 0.050(10) 0.19(3) 0.135(19) -0.018(17) 0.030(11) -0.049(14)
C95 0.048(9) 0.105(14) 0.107(13) 0.008(11) 0.030(9) -0.016(9)
C96 0.067(10) 0.069(11) 0.118(14) -0.022(10) 0.027(10) -0.016(9)
C101 0.030(5) 0.027(5) 0.032(5) -0.004(4) 0.003(4) -0.005(4)
C102 0.039(6) 0.031(6) 0.037(6) 0.001(5) 0.010(5) -0.001(5)
C103 0.036(6) 0.048(7) 0.061(8) -0.005(6) 0.014(6) -0.008(5)
C104 0.038(6) 0.038(7) 0.048(7) -0.012(5) -0.009(5) 0.002(5)
C105 0.043(6) 0.033(6) 0.038(6) -0.005(5) 0.004(5) 0.005(5)
C106 0.037(6) 0.032(6) 0.035(6) 0.001(5) 0.013(5) 0.006(5)
C111 0.038(6) 0.026(5) 0.031(5) 0.004(4) 0.014(4) -0.002(4)
C112 0.048(6) 0.028(6) 0.035(6) -0.002(4) 0.022(5) -0.001(5)
C113 0.056(7) 0.033(6) 0.036(6) 0.006(5) 0.016(5) 0.008(5)
C114 0.067(8) 0.030(6) 0.043(6) 0.006(5) 0.030(6) 0.005(6)
C115 0.048(7) 0.042(7) 0.035(6) -0.006(5) 0.015(5) -0.012(5)
C116 0.053(7) 0.034(6) 0.020(5) 0.008(4) 0.012(5) -0.007(5)
C121 0.028(5) 0.031(6) 0.037(6) 0.002(4) 0.015(4) 0.009(4)
C122 0.031(5) 0.047(7) 0.037(6) -0.001(5) 0.016(5) -0.005(5)
C123 0.035(6) 0.048(7) 0.055(7) 0.008(6) 0.014(5) -0.004(5)
C124 0.037(6) 0.040(7) 0.072(8) 0.017(6) 0.032(6) 0.005(5)
C125 0.065(8) 0.040(7) 0.050(7) 0.014(6) 0.034(7) 0.013(6)
C126 0.031(5) 0.044(7) 0.046(6) 0.006(5) 0.016(5) 0.017(5)
C131 0.036(5) 0.025(5) 0.028(5) -0.001(4) 0.004(4) 0.003(4)
C132 0.046(6) 0.029(6) 0.031(5) 0.010(4) 0.010(5) 0.005(5)
C133 0.057(7) 0.028(6) 0.036(6) 0.001(5) 0.015(5) 0.010(5)
C134 0.074(8) 0.031(6) 0.026(5) -0.003(5) 0.006(5) 0.014(6)
C135 0.041(6) 0.029(6) 0.035(6) 0.001(5) -0.001(5) 0.002(5)
C136 0.036(6) 0.032(6) 0.033(5) -0.003(4) 0.008(5) 0.003(5)
C1S 0.20(3) 0.21(4) 0.19(3) 0.05(3) 0.09(3) -0.02(3)
C2S 0.32(6) 0.15(3) 0.28(5) -0.08(3) 0.19(5) -0.11(4)
C3S 0.44(7) 0.42(7) 0.09(2) 0.03(3) -0.01(3) -0.34(6)
C4S 0.25(5) 0.50(10) 0.28(6) 0.16(6) -0.04(5) -0.22(6)
C5S 0.21(4) 0.41(7) 0.23(5) 0.20(5) 0.00(4) -0.06(4)
C6S 0.19(4) 0.43(7) 0.14(3) 0.04(4) 0.01(3) -0.11(4)

_geom_special_details
;
  All esds (except the esd in the dihedral angle between two l.s. planes)
  are estimated using the full covariance matrix.  The cell esds are taken
  into account individually in the estimation of esds in distances, angles
  and torsion angles; correlations between esds in cell parameters are only
  used when they are defined by crystal symmetry.  An approximate (isotropic)
  treatment of cell esds is used for estimating esds involving l.s. planes.
;

loop_
  _geom_bond_atom_site_label_1
  _geom_bond_atom_site_label_2
  _geom_bond_distance
  _geom_bond_site_symmetry_2
  _geom_bond_publ_flag
Ru1 C1 2.038(9) . ?
Ru1 C2 2.225(9) . ?
Ru1 C7 2.238(10) . ?
Ru1 C4 2.246(9) . ?
Ru1 C5 2.248(10) . ?
Ru1 C3 2.264(9) . ?
Ru1 C6 2.308(10) . ?
Ru1 Ru2 2.7633(11) . ?
Ru1 Ru5 2.7673(10) . ?
Ru1 Ru3 2.7701(10) . ?
Ru1 Ru4 2.7922(11) . ?
Ru2 C21 1.899(13) . ?
Ru2 C22 1.903(12) . ?
Ru2 C1 2.053(10) . ?
Ru2 Sn2 2.6022(12) . ?
Ru2 Sn1 2.6027(11) . ?
Ru2 Ru3 2.8825(12) . ?
Ru2 Ru5 2.8864(11) . ?
Ru3 C31 1.875(11) . ?
Ru3 C32 1.893(11) . ?
Ru3 C1 2.047(8) . ?
Ru3 Sn3 2.6239(11) . ?
Ru3 Sn2 2.6654(12) . ?
Ru3 Ru4 2.9012(10) . ?
Ru4 C42 1.894(10) . ?
Ru4 C41 1.911(11) . ?
Ru4 C1 2.051(10) . ?
Ru4 Sn4 2.6261(9) . ?
Ru4 Sn3 2.6280(10) . ?
Ru4 Ru5 2.8983(11) . ?
Ru5 C52 1.877(11) . ?
Ru5 C51 1.888(10) . ?
Ru5 C1 2.056(8) . ?
Ru5 Sn4 2.6278(10) . ?
Ru5 Sn1 2.6429(11) . ?
Sn1 C61 2.145(13) . ?
Sn1 C71 2.153(11) . ?
Sn2 C91 2.128(14) . ?
Sn2 C81 2.156(14) . ?
Sn3 C111 2.146(10) . ?
Sn3 C101 2.156(10) . ?
Sn4 C131 2.147(10) . ?
Sn4 C121 2.165(10) . ?
O21 C21 1.142(15) . ?
O22 C22 1.140(14) . ?
O31 C31 1.155(13) . ?
O32 C32 1.147(13) . ?
O41 C41 1.137(12) . ?
O42 C42 1.151(12) . ?
O51 C51 1.146(12) . ?
O52 C52 1.142(13) . ?
C2 C3 1.370(14) . ?
C2 C7 1.419(15) . ?
C3 C4 1.416(14) . ?
C4 C5 1.416(15) . ?
C5 C6 1.422(15) . ?
C6 C7 1.387(15) . ?
C61 C66 1.386(19) . ?
C61 C62 1.425(18) . ?
C62 C63 1.41(2) . ?
C63 C64 1.34(2) . ?
C64 C65 1.28(2) . ?
C65 C66 1.38(2) . ?
C71 C76 1.373(17) . ?
C71 C72 1.386(17) . ?
C72 C73 1.368(19) . ?
C73 C74 1.34(2) . ?
C74 C75 1.357(19) . ?
C75 C76 1.398(17) . ?
C81 C86 1.362(19) . ?
C81 C82 1.39(2) . ?
C82 C83 1.34(2) . ?
C83 C84 1.34(2) . ?
C84 C85 1.31(2) . ?
C85 C86 1.41(2) . ?
C91 C96 1.35(2) . ?
C91 C92 1.45(2) . ?
C92 C93 1.33(2) . ?
C93 C94 1.46(3) . ?
C94 C95 1.34(3) . ?
C95 C96 1.39(2) . ?
C101 C106 1.380(14) . ?
C101 C102 1.388(14) . ?
C102 C103 1.396(16) . ?
C103 C104 1.382(17) . ?
C104 C105 1.387(16) . ?
C105 C106 1.366(15) . ?
C111 C112 1.378(15) . ?
C111 C116 1.395(15) . ?
C112 C113 1.385(15) . ?
C113 C114 1.371(17) . ?
C114 C115 1.409(16) . ?
C115 C116 1.367(15) . ?
C121 C122 1.351(15) . ?
C121 C126 1.406(14) . ?
C122 C123 1.410(14) . ?
C123 C124 1.379(17) . ?
C124 C125 1.355(18) . ?
C125 C126 1.377(16) . ?
C131 C132 1.381(14) . ?
C131 C136 1.405(14) . ?
C132 C133 1.378(15) . ?
C133 C134 1.379(17) . ?
C134 C135 1.351(15) . ?
C135 C136 1.386(14) . ?
C1S C2S 1.35(2) . ?
C2S C3S 1.36(2) . ?
C3S C4S 1.36(2) . ?
C4S C5S 1.36(2) . ?
C5S C6S 1.36(2) . ?
C11S Cl2S 1.752(10) . ?
C11S Cl1S 1.753(10) . ?

loop_
  _geom_angle_atom_site_label_1
  _geom_angle_atom_site_label_2
  _geom_angle_atom_site_label_3
  _geom_angle
  _geom_angle_site_symmetry_1
  _geom_angle_site_symmetry_3
  _geom_angle_publ_flag
C1 Ru1 C2 142.2(4) . . ?
C1 Ru1 C7 142.9(3) . . ?
C2 Ru1 C7 37.1(4) . . ?
C1 Ru1 C4 139.7(3) . . ?
C2 Ru1 C4 65.5(3) . . ?
C7 Ru1 C4 77.3(3) . . ?
C1 Ru1 C5 140.4(4) . . ?
C2 Ru1 C5 77.4(4) . . ?
C7 Ru1 C5 65.0(4) . . ?
C4 Ru1 C5 36.7(4) . . ?
C1 Ru1 C3 141.5(4) . . ?
C2 Ru1 C3 35.5(4) . . ?
C7 Ru1 C3 64.9(4) . . ?
C4 Ru1 C3 36.6(3) . . ?
C5 Ru1 C3 65.4(4) . . ?
C1 Ru1 C6 142.1(4) . . ?
C2 Ru1 C6 65.3(4) . . ?
C7 Ru1 C6 35.5(4) . . ?
C4 Ru1 C6 65.6(4) . . ?
C5 Ru1 C6 36.3(4) . . ?
C3 Ru1 C6 76.4(4) . . ?
C1 Ru1 Ru2 47.7(3) . . ?
C2 Ru1 Ru2 140.6(3) . . ?
C7 Ru1 Ru2 108.0(3) . . ?
C4 Ru1 Ru2 138.4(3) . . ?
C5 Ru1 Ru2 106.7(3) . . ?
C3 Ru1 Ru2 170.7(3) . . ?
C6 Ru1 Ru2 94.4(3) . . ?
C1 Ru1 Ru5 47.7(2) . . ?
C2 Ru1 Ru5 156.4(3) . . ?
C7 Ru1 Ru5 156.7(3) . . ?
C4 Ru1 Ru5 95.6(2) . . ?
C5 Ru1 Ru5 96.0(3) . . ?
C3 Ru1 Ru5 121.2(3) . . ?
C6 Ru1 Ru5 121.4(3) . . ?
Ru2 Ru1 Ru5 62.92(3) . . ?
C1 Ru1 Ru3 47.4(2) . . ?
C2 Ru1 Ru3 98.8(2) . . ?
C7 Ru1 Ru3 99.1(3) . . ?
C4 Ru1 Ru3 158.7(3) . . ?
C5 Ru1 Ru3 158.3(3) . . ?
C3 Ru1 Ru3 122.8(3) . . ?
C6 Ru1 Ru3 122.6(3) . . ?
Ru2 Ru1 Ru3 62.79(3) . . ?
Ru5 Ru1 Ru3 95.17(3) . . ?
C1 Ru1 Ru4 47.1(3) . . ?
C2 Ru1 Ru4 107.4(3) . . ?
C7 Ru1 Ru4 140.4(3) . . ?
C4 Ru1 Ru4 106.6(3) . . ?
C5 Ru1 Ru4 138.7(3) . . ?
C3 Ru1 Ru4 94.4(3) . . ?
C6 Ru1 Ru4 170.7(3) . . ?
Ru2 Ru1 Ru4 94.87(3) . . ?
Ru5 Ru1 Ru4 62.84(3) . . ?
Ru3 Ru1 Ru4 62.88(3) . . ?
C21 Ru2 C22 101.1(5) . . ?
C21 Ru2 C1 145.8(4) . . ?
C22 Ru2 C1 113.1(5) . . ?
C21 Ru2 Sn2 80.7(4) . . ?
C22 Ru2 Sn2 82.7(4) . . ?
C1 Ru2 Sn2 102.4(2) . . ?
C21 Ru2 Sn1 80.0(4) . . ?
C22 Ru2 Sn1 85.3(4) . . ?
C1 Ru2 Sn1 102.7(2) . . ?
Sn2 Ru2 Sn1 154.78(4) . . ?
C21 Ru2 Ru1 98.6(3) . . ?
C22 Ru2 Ru1 160.3(4) . . ?
C1 Ru2 Ru1 47.3(2) . . ?
Sn2 Ru2 Ru1 102.14(4) . . ?
Sn1 Ru2 Ru1 96.62(3) . . ?
C21 Ru2 Ru3 121.8(4) . . ?
C22 Ru2 Ru3 110.8(4) . . ?
C1 Ru2 Ru3 45.2(2) . . ?
Sn2 Ru2 Ru3 57.88(3) . . ?
Sn1 Ru2 Ru3 147.30(4) . . ?
Ru1 Ru2 Ru3 58.72(3) . . ?
C21 Ru2 Ru5 124.8(3) . . ?
C22 Ru2 Ru5 107.7(4) . . ?
C1 Ru2 Ru5 45.4(2) . . ?
Sn2 Ru2 Ru5 147.85(4) . . ?
Sn1 Ru2 Ru5 57.28(3) . . ?
Ru1 Ru2 Ru5 58.61(3) . . ?
Ru3 Ru2 Ru5 90.25(3) . . ?
C31 Ru3 C32 99.1(5) . . ?
C31 Ru3 C1 142.5(4) . . ?
C32 Ru3 C1 118.4(4) . . ?
C31 Ru3 Sn3 80.9(3) . . ?
C32 Ru3 Sn3 85.5(3) . . ?
C1 Ru3 Sn3 101.5(3) . . ?
C31 Ru3 Sn2 82.6(3) . . ?
C32 Ru3 Sn2 82.8(3) . . ?
C1 Ru3 Sn2 100.5(3) . . ?
Sn3 Ru3 Sn2 157.89(4) . . ?
C31 Ru3 Ru1 95.4(3) . . ?
C32 Ru3 Ru1 165.5(4) . . ?
C1 Ru3 Ru1 47.2(2) . . ?
Sn3 Ru3 Ru1 95.66(3) . . ?
Sn2 Ru3 Ru1 100.35(4) . . ?
C31 Ru3 Ru2 119.8(3) . . ?
C32 Ru3 Ru2 114.1(4) . . ?
C1 Ru3 Ru2 45.4(3) . . ?
Sn3 Ru3 Ru2 146.24(4) . . ?
Sn2 Ru3 Ru2 55.78(3) . . ?
Ru1 Ru3 Ru2 58.49(3) . . ?
C31 Ru3 Ru4 123.6(3) . . ?
C32 Ru3 Ru4 111.0(3) . . ?
C1 Ru3 Ru4 45.0(3) . . ?
Sn3 Ru3 Ru4 56.54(3) . . ?
Sn2 Ru3 Ru4 145.53(4) . . ?
Ru1 Ru3 Ru4 58.94(3) . . ?
Ru2 Ru3 Ru4 90.06(3) . . ?
C42 Ru4 C41 95.8(4) . . ?
C42 Ru4 C1 107.6(4) . . ?
C41 Ru4 C1 156.5(4) . . ?
C42 Ru4 Sn4 90.2(3) . . ?
C41 Ru4 Sn4 78.1(3) . . ?
C1 Ru4 Sn4 101.7(2) . . ?
C42 Ru4 Sn3 89.9(3) . . ?
C41 Ru4 Sn3 77.8(3) . . ?
C1 Ru4 Sn3 101.3(2) . . ?
Sn4 Ru4 Sn3 155.86(4) . . ?
C42 Ru4 Ru1 154.4(3) . . ?
C41 Ru4 Ru1 109.8(3) . . ?
C1 Ru4 Ru1 46.7(2) . . ?
Sn4 Ru4 Ru1 95.29(3) . . ?
Sn3 Ru4 Ru1 95.04(3) . . ?
C42 Ru4 Ru5 105.9(3) . . ?
C41 Ru4 Ru5 128.8(3) . . ?
C1 Ru4 Ru5 45.2(2) . . ?
Sn4 Ru4 Ru5 56.55(2) . . ?
Sn3 Ru4 Ru5 145.63(4) . . ?
Ru1 Ru4 Ru5 58.16(3) . . ?
C42 Ru4 Ru3 105.5(3) . . ?
C41 Ru4 Ru3 128.5(3) . . ?
C1 Ru4 Ru3 44.9(2) . . ?
Sn4 Ru4 Ru3 145.82(4) . . ?
Sn3 Ru4 Ru3 56.40(3) . . ?
Ru1 Ru4 Ru3 58.19(3) . . ?
Ru5 Ru4 Ru3 89.65(3) . . ?
C52 Ru5 C51 95.7(5) . . ?
C52 Ru5 C1 115.5(4) . . ?
C51 Ru5 C1 148.7(4) . . ?
C52 Ru5 Sn4 87.4(3) . . ?
C51 Ru5 Sn4 79.0(3) . . ?
C1 Ru5 Sn4 101.5(3) . . ?
C52 Ru5 Sn1 87.7(3) . . ?
C51 Ru5 Sn1 78.7(3) . . ?
C1 Ru5 Sn1 101.3(3) . . ?
Sn4 Ru5 Sn1 156.57(4) . . ?
C52 Ru5 Ru1 162.7(4) . . ?
C51 Ru5 Ru1 101.5(3) . . ?
C1 Ru5 Ru1 47.2(2) . . ?
Sn4 Ru5 Ru1 95.85(3) . . ?
Sn1 Ru5 Ru1 95.59(3) . . ?
C52 Ru5 Ru2 111.1(3) . . ?
C51 Ru5 Ru2 124.5(3) . . ?
C1 Ru5 Ru2 45.3(3) . . ?
Sn4 Ru5 Ru2 146.22(4) . . ?
Sn1 Ru5 Ru2 55.95(3) . . ?
Ru1 Ru5 Ru2 58.47(3) . . ?
C52 Ru5 Ru4 110.3(3) . . ?
C51 Ru5 Ru4 125.6(3) . . ?
C1 Ru5 Ru4 45.0(3) . . ?
Sn4 Ru5 Ru4 56.49(2) . . ?
Sn1 Ru5 Ru4 145.82(4) . . ?
Ru1 Ru5 Ru4 59.00(3) . . ?
Ru2 Ru5 Ru4 90.04(3) . . ?
C61 Sn1 C71 100.0(5) . . ?
C61 Sn1 Ru2 128.9(4) . . ?
C71 Sn1 Ru2 118.6(3) . . ?
C61 Sn1 Ru5 121.3(3) . . ?
C71 Sn1 Ru5 120.9(3) . . ?
Ru2 Sn1 Ru5 66.76(3) . . ?
C91 Sn2 C81 105.1(6) . . ?
C91 Sn2 Ru2 115.2(4) . . ?
C81 Sn2 Ru2 125.2(4) . . ?
C91 Sn2 Ru3 122.3(5) . . ?
C81 Sn2 Ru3 119.8(4) . . ?
Ru2 Sn2 Ru3 66.34(3) . . ?
C111 Sn3 C101 103.9(4) . . ?
C111 Sn3 Ru3 123.0(3) . . ?
C101 Sn3 Ru3 119.8(3) . . ?
C111 Sn3 Ru4 117.2(3) . . ?
C101 Sn3 Ru4 123.7(3) . . ?
Ru3 Sn3 Ru4 67.07(3) . . ?
C131 Sn4 C121 104.0(4) . . ?
C131 Sn4 Ru4 118.5(3) . . ?
C121 Sn4 Ru4 123.9(3) . . ?
C131 Sn4 Ru5 120.3(3) . . ?
C121 Sn4 Ru5 120.9(3) . . ?
Ru4 Sn4 Ru5 66.96(3) . . ?
Ru1 C1 Ru3 85.4(3) . . ?
Ru1 C1 Ru4 86.1(3) . . ?
Ru3 C1 Ru4 90.1(4) . . ?
Ru1 C1 Ru2 85.0(4) . . ?
Ru3 C1 Ru2 89.3(3) . . ?
Ru4 C1 Ru2 171.1(5) . . ?
Ru1 C1 Ru5 85.1(3) . . ?
Ru3 C1 Ru5 170.4(5) . . ?
Ru4 C1 Ru5 89.8(3) . . ?
Ru2 C1 Ru5 89.3(4) . . ?
C3 C2 C7 120.0(10) . . ?
C3 C2 Ru1 73.8(6) . . ?
C7 C2 Ru1 72.0(6) . . ?
C2 C3 C4 120.6(10) . . ?
C2 C3 Ru1 70.7(6) . . ?
C4 C3 Ru1 71.0(5) . . ?
C3 C4 C5 118.8(9) . . ?
C3 C4 Ru1 72.4(5) . . ?
C5 C4 Ru1 71.7(6) . . ?
C4 C5 C6 120.8(10) . . ?
C4 C5 Ru1 71.6(6) . . ?
C6 C5 Ru1 74.1(6) . . ?
C7 C6 C5 118.1(10) . . ?
C7 C6 Ru1 69.5(6) . . ?
C5 C6 Ru1 69.5(6) . . ?
C6 C7 C2 121.4(9) . . ?
C6 C7 Ru1 75.0(6) . . ?
C2 C7 Ru1 71.0(5) . . ?
O21 C21 Ru2 178.0(14) . . ?
O22 C22 Ru2 178.0(12) . . ?
O31 C31 Ru3 179.3(9) . . ?
O32 C32 Ru3 173.6(11) . . ?
O41 C41 Ru4 176.5(9) . . ?
O42 C42 Ru4 178.8(9) . . ?
O51 C51 Ru5 178.7(9) . . ?
O52 C52 Ru5 175.8(11) . . ?
C66 C61 C62 116.4(13) . . ?
C66 C61 Sn1 117.2(10) . . ?
C62 C61 Sn1 126.1(10) . . ?
C63 C62 C61 117.2(15) . . ?
C64 C63 C62 122.1(15) . . ?
C65 C64 C63 121.3(17) . . ?
C64 C65 C66 120.6(18) . . ?
C65 C66 C61 122.3(15) . . ?
C76 C71 C72 117.9(12) . . ?
C76 C71 Sn1 121.5(9) . . ?
C72 C71 Sn1 120.7(9) . . ?
C73 C72 C71 119.9(14) . . ?
C74 C73 C72 122.0(14) . . ?
C73 C74 C75 119.9(13) . . ?
C74 C75 C76 119.3(13) . . ?
C71 C76 C75 120.9(13) . . ?
C86 C81 C82 115.8(15) . . ?
C86 C81 Sn2 121.1(12) . . ?
C82 C81 Sn2 123.0(11) . . ?
C83 C82 C81 120.8(15) . . ?
C84 C83 C82 121.6(17) . . ?
C85 C84 C83 120.8(18) . . ?
C84 C85 C86 118.6(17) . . ?
C81 C86 C85 121.9(17) . . ?
C96 C91 C92 115.9(15) . . ?
C96 C91 Sn2 123.5(12) . . ?
C92 C91 Sn2 120.2(13) . . ?
C93 C92 C91 124(2) . . ?
C92 C93 C94 116(2) . . ?
C95 C94 C93 122.7(17) . . ?
C94 C95 C96 118.2(19) . . ?
C91 C96 C95 123.6(17) . . ?
C106 C101 C102 117.4(9) . . ?
C106 C101 Sn3 119.2(7) . . ?
C102 C101 Sn3 123.4(7) . . ?
C101 C102 C103 121.8(10) . . ?
C104 C103 C102 118.6(11) . . ?
C103 C104 C105 120.3(10) . . ?
C106 C105 C104 119.6(10) . . ?
C105 C106 C101 122.3(10) . . ?
C112 C111 C116 118.3(9) . . ?
C112 C111 Sn3 120.0(7) . . ?
C116 C111 Sn3 121.6(7) . . ?
C111 C112 C113 119.9(11) . . ?
C114 C113 C112 121.3(11) . . ?
C113 C114 C115 119.6(10) . . ?
C116 C115 C114 118.1(11) . . ?
C115 C116 C111 122.6(10) . . ?
C122 C121 C126 118.5(9) . . ?
C122 C121 Sn4 123.7(7) . . ?
C126 C121 Sn4 117.8(8) . . ?
C121 C122 C123 121.1(10) . . ?
C124 C123 C122 119.6(11) . . ?
C125 C124 C123 119.3(10) . . ?
C124 C125 C126 121.5(11) . . ?
C125 C126 C121 120.1(11) . . ?
C132 C131 C136 117.2(9) . . ?
C132 C131 Sn4 122.0(8) . . ?
C136 C131 Sn4 120.7(7) . . ?
C133 C132 C131 121.2(10) . . ?
C132 C133 C134 120.4(10) . . ?
C135 C134 C133 119.9(11) . . ?
C134 C135 C136 120.4(11) . . ?
C135 C136 C131 120.9(10) . . ?
C1S C2S C3S 126(4) . . ?
C4S C3S C2S 140(5) . . ?
C3S C4S C5S 144(4) . . ?
C6S C5S C4S 141(5) . . ?
Cl2S C11S Cl1S 103(2) . . ?

_diffrn_measured_fraction_theta_max    0.999
_diffrn_reflns_theta_full              25.03
_diffrn_measured_fraction_theta_full   0.999
_refine_diff_density_max    1.535
_refine_diff_density_min   -3.195
_refine_diff_density_rms    0.192

#===END

Compound 8


data_rusn55a

_audit_creation_method            SHELXL-97
_chemical_name_systematic
;
  ?
;
_chemical_name_common             ?
_chemical_melting_point           ?
_chemical_formula_moiety          ?
_chemical_formula_sum
  'C83 H68 O7 Ru5 Sn5'
_chemical_formula_weight          2276.17

loop_
  _atom_type_symbol
  _atom_type_description
  _atom_type_scat_dispersion_real
  _atom_type_scat_dispersion_imag
  _atom_type_scat_source
  'C'  'C'   0.0033   0.0016
  'International Tables Vol C Tables 4.2.6.8 and 6.1.1.4'
  'H'  'H'   0.0000   0.0000
  'International Tables Vol C Tables 4.2.6.8 and 6.1.1.4'
  'O'  'O'   0.0106   0.0060
  'International Tables Vol C Tables 4.2.6.8 and 6.1.1.4'
  'Ru'  'Ru'  -1.2594   0.8363
  'International Tables Vol C Tables 4.2.6.8 and 6.1.1.4'
  'Sn'  'Sn'  -0.6537   1.4246
  'International Tables Vol C Tables 4.2.6.8 and 6.1.1.4'

_symmetry_cell_setting            orthorhombic
_symmetry_space_group_name_H-M    Pnma

loop_
  _symmetry_equiv_pos_as_xyz
  'x, y, z'
  '-x+1/2, -y, z+1/2'
  '-x, y+1/2, -z'
  'x+1/2, -y+1/2, -z+1/2'
  '-x, -y, -z'
  'x-1/2, y, -z-1/2'
  'x, -y-1/2, z'
  '-x-1/2, y-1/2, z-1/2'

_cell_length_a                    20.3739(10)
_cell_length_b                    22.1686(11)
_cell_length_c                    19.0630(9)
_cell_angle_alpha                 90.00
_cell_angle_beta                  90.00
_cell_angle_gamma                 90.00
_cell_volume                      8610.0(7)
_cell_formula_units_Z             4
_cell_measurement_temperature     293(2)
_cell_measurement_reflns_used     6384
_cell_measurement_theta_min       2.35
_cell_measurement_theta_max       25.5

_exptl_crystal_description        bar
_exptl_crystal_colour             red
_exptl_crystal_size_max           0.22
_exptl_crystal_size_mid           0.08
_exptl_crystal_size_min           0.06
_exptl_crystal_density_meas       ?
_exptl_crystal_density_diffrn     1.756
_exptl_crystal_density_method     'not measured'
_exptl_crystal_F_000              4368
_exptl_absorpt_coefficient_mu     2.322
_exptl_absorpt_correction_type    SADABS
_exptl_absorpt_correction_T_min   0.804
_exptl_absorpt_correction_T_max   0.962
_exptl_absorpt_process_details    '(SADABS, Bruker, 1997)'

_exptl_special_details
;
  ?
;

_diffrn_ambient_temperature       293(2)
_diffrn_radiation_wavelength      0.71073
_diffrn_radiation_type            MoK\a
_diffrn_radiation_source          'fine-focus sealed tube'
_diffrn_radiation_monochromator   graphite
_diffrn_measurement_device_type   'Bruker SMART APEX CCD diffractometer'
_diffrn_measurement_method        'omega scans'
_diffrn_detector_area_resol_mean  ?
_diffrn_standards_number          ?
_diffrn_standards_interval_count  ?
_diffrn_standards_interval_time   ?
_diffrn_standards_decay_%         <1
_diffrn_reflns_number             50463
_diffrn_reflns_av_R_equivalents   0.0664
_diffrn_reflns_av_sigmaI/netI     0.0379
_diffrn_reflns_limit_h_min        -24
_diffrn_reflns_limit_h_max        24
_diffrn_reflns_limit_k_min        -26
_diffrn_reflns_limit_k_max        26
_diffrn_reflns_limit_l_min        -22
_diffrn_reflns_limit_l_max        20
_diffrn_reflns_theta_min          1.41
_diffrn_reflns_theta_max          25.03
_reflns_number_total              7834
_reflns_number_gt                 5966
_reflns_threshold_expression      >2sigma(I)

_computing_data_collection        'SMART NT V5.619 (Bruker, 2000)'
_computing_cell_refinement        'SAINT+ NT V6.02a (Bruker, 1998)'
_computing_data_reduction         'SAINT+ NT V6.02a'
_computing_structure_solution     'SHELXS-97 (Sheldrick, 1990)'
_computing_structure_refinement   'SHELXL-97 (Sheldrick, 1997)'
_computing_molecular_graphics     'SHELXTL V5.1 (Sheldrick, 1997)'
_computing_publication_material   'SHELXTL V5.1'

_refine_special_details
;
  Refinement of F^2^ against ALL reflections.  The weighted R-factor wR and
  goodness of fit S are based on F^2^, conventional R-factors R are based
  on F, with F set to zero for negative F^2^. The threshold expression of
  F^2^ > 2sigma(F^2^) is used only for calculating R-factors(gt) etc. and is
  not relevant to the choice of reflections for refinement.  R-factors based
  on F^2^ are statistically about twice as large as those based on F, and R-
  factors based on ALL data will be even larger.
;

_refine_ls_structure_factor_coef  Fsqd
_refine_ls_matrix_type            full
_refine_ls_weighting_scheme       calc
_refine_ls_weighting_details
  'calc w=1/[\s^2^(Fo^2^)+(0.0696P)^2^+1.6531P] where P=(Fo^2^+2Fc^2^)/3'
_atom_sites_solution_primary      direct
_atom_sites_solution_secondary    difmap
_atom_sites_solution_hydrogens    geom
_refine_ls_hydrogen_treatment     mixed
_refine_ls_extinction_method      none
_refine_ls_extinction_coef        ?
_refine_ls_number_reflns          7834
_refine_ls_number_parameters      498
_refine_ls_number_restraints      89
_refine_ls_R_factor_all           0.0658
_refine_ls_R_factor_gt            0.0469
_refine_ls_wR_factor_ref          0.1287
_refine_ls_wR_factor_gt           0.1196
_refine_ls_goodness_of_fit_ref    1.093
_refine_ls_restrained_S_all       1.114
_refine_ls_shift/su_max           0.001
_refine_ls_shift/su_mean          0.000

loop_
  _atom_site_label
  _atom_site_type_symbol
  _atom_site_fract_x
  _atom_site_fract_y
  _atom_site_fract_z
  _atom_site_U_iso_or_equiv
  _atom_site_adp_type
  _atom_site_occupancy
  _atom_site_symmetry_multiplicity
  _atom_site_calc_flag
  _atom_site_refinement_flags
  _atom_site_disorder_assembly
  _atom_site_disorder_group
Ru1 Ru 0.41381(4) 0.2500 0.39964(4) 0.0406(2) Uani 1 2 d S . .
Ru2 Ru 0.27200(4) 0.2500 0.42491(4) 0.0370(2) Uani 1 2 d S . .
Ru3 Ru 0.35825(3) 0.34238(3) 0.48228(3) 0.04115(16) Uani 1 1 d . . .
Ru4 Ru 0.43561(4) 0.2500 0.54741(4) 0.0437(2) Uani 1 2 d S . .
Sn1 Sn 0.18280(4) 0.2500 0.31623(4) 0.0502(2) Uani 1 2 d S . .
Sn2 Sn 0.25121(2) 0.36495(2) 0.40202(3) 0.04582(16) Uani 1 1 d . . .
Sn3 Sn 0.46215(3) 0.36772(3) 0.55699(3) 0.05259(17) Uani 1 1 d . . .
C1 C 0.3535(4) 0.2500 0.4868(5) 0.036(2) Uani 1 2 d S . .
C2 C 0.4473(4) 0.2813(5) 0.2941(5) 0.077(3) Uani 1 1 d . . .
H2 H 0.4229 0.3026 0.2611 0.093 Uiso 1 1 calc R . .
C3 C 0.4848(5) 0.3119(4) 0.3447(6) 0.079(3) Uani 1 1 d . . .
H3 H 0.4869 0.3538 0.3443 0.095 Uiso 1 1 calc R . .
C4 C 0.5176(4) 0.2801(5) 0.3938(5) 0.075(3) Uani 1 1 d . . .
H4 H 0.5407 0.3006 0.4285 0.090 Uiso 1 1 calc R . .
C21 C 0.2064(5) 0.2500 0.4922(6) 0.056(3) Uani 1 2 d S . .
C31 C 0.3829(4) 0.4129(4) 0.4322(5) 0.065(2) Uani 1 1 d . . .
C32 C 0.3081(4) 0.3765(4) 0.5538(5) 0.062(2) Uani 1 1 d . . .
C41 C 0.5257(7) 0.2500 0.5673(7) 0.075(4) Uani 1 2 d S . .
C42 C 0.4068(7) 0.2500 0.6399(7) 0.070(4) Uani 1 2 d S . .
C51 C 0.2218(5) 0.2500 0.2118(5) 0.069(3) Uani 1 2 d SD . .
C52 C 0.2866(6) 0.2500 0.1997(7) 0.197(15) Uani 1 2 d SD . .
H52 H 0.3153 0.2500 0.2377 0.236 Uiso 1 2 calc SR . .
C53 C 0.3117(7) 0.2500 0.1333(8) 0.30(3) Uani 1 2 d SD . .
H53 H 0.3569 0.2500 0.1262 0.355 Uiso 1 2 calc SR . .
C54 C 0.2706(8) 0.2500 0.0783(7) 0.189(13) Uani 1 2 d SD . .
H54 H 0.2878 0.2500 0.0331 0.227 Uiso 1 2 calc SR . .
C55 C 0.2073(8) 0.2500 0.0868(6) 0.132(8) Uani 1 2 d SD . .
H55 H 0.1793 0.2500 0.0482 0.158 Uiso 1 2 calc SR . .
C56 C 0.1821(5) 0.2500 0.1548(6) 0.099(5) Uani 1 2 d SD . .
H56 H 0.1369 0.2500 0.1612 0.119 Uiso 1 2 calc SR . .
C61 C 0.1111(4) 0.3241(4) 0.3148(5) 0.067(2) Uani 1 1 d . . .
C62 C 0.1099(5) 0.3670(4) 0.2630(6) 0.083(3) Uani 1 1 d . . .
H62 H 0.1411 0.3667 0.2275 0.099 Uiso 1 1 calc R . .
C63 C 0.0615(7) 0.4108(5) 0.2644(7) 0.104(4) Uani 1 1 d . . .
H63 H 0.0616 0.4409 0.2305 0.125 Uiso 1 1 calc R . .
C64 C 0.0151(6) 0.4106(6) 0.3129(8) 0.105(4) Uani 1 1 d . . .
H64 H -0.0175 0.4399 0.3118 0.126 Uiso 1 1 calc R . .
C65 C 0.0145(6) 0.3677(6) 0.3649(10) 0.132(5) Uani 1 1 d . . .
H65 H -0.0182 0.3680 0.3990 0.159 Uiso 1 1 calc R . .
C66 C 0.0620(6) 0.3250(6) 0.3658(7) 0.112(4) Uani 1 1 d . . .
H66 H 0.0619 0.2959 0.4009 0.135 Uiso 1 1 calc R . .
C71 C 0.2714(4) 0.4149(4) 0.3076(4) 0.058(2) Uani 1 1 d D . .
C72 C 0.3131(7) 0.3942(7) 0.2593(6) 0.175(8) Uani 1 1 d D . .
H72 H 0.3331 0.3571 0.2668 0.210 Uiso 1 1 calc R . .
C73 C 0.3277(7) 0.4252(8) 0.1990(7) 0.205(11) Uani 1 1 d D . .
H73 H 0.3587 0.4100 0.1678 0.246 Uiso 1 1 calc R . .
C74 C 0.2975(6) 0.4773(6) 0.1851(6) 0.115(5) Uani 1 1 d D . .
H74 H 0.3106 0.5010 0.1474 0.138 Uiso 1 1 calc R . .
C75 C 0.2494(9) 0.4945(6) 0.2253(7) 0.180(9) Uani 1 1 d D . .
H75 H 0.2242 0.5278 0.2128 0.217 Uiso 1 1 calc R . .
C76 C 0.2352(7) 0.4633(5) 0.2870(6) 0.149(7) Uani 1 1 d D . .
H76 H 0.2002 0.4759 0.3147 0.179 Uiso 1 1 calc R . .
C81 C 0.1809(4) 0.4206(3) 0.4560(4) 0.060(2) Uani 1 1 d D . .
C82 C 0.1362(6) 0.3997(5) 0.5017(7) 0.139(6) Uani 1 1 d D . .
H82 H 0.1351 0.3584 0.5104 0.167 Uiso 1 1 calc R . .
C83 C 0.0921(7) 0.4357(6) 0.5360(8) 0.160(7) Uani 1 1 d D . .
H83 H 0.0619 0.4189 0.5668 0.192 Uiso 1 1 calc R . .
C84 C 0.0929(6) 0.4951(6) 0.5248(7) 0.126(6) Uani 1 1 d D . .
H84 H 0.0616 0.5197 0.5458 0.152 Uiso 1 1 calc R . .
C85 C 0.1377(8) 0.5185(5) 0.4842(8) 0.156(7) Uani 1 1 d D . .
H85 H 0.1391 0.5600 0.4775 0.187 Uiso 1 1 calc R . .
C86 C 0.1835(6) 0.4817(4) 0.4510(6) 0.118(5) Uani 1 1 d D . .
H86 H 0.2168 0.4993 0.4246 0.142 Uiso 1 1 calc R . .
C91 C 0.4625(4) 0.4015(4) 0.6634(4) 0.062(2) Uani 1 1 d D . .
C92 C 0.5168(4) 0.4267(4) 0.6917(4) 0.078(3) Uani 1 1 d D . .
H92 H 0.5528 0.4341 0.6631 0.093 Uiso 1 1 calc R . .
C93 C 0.5205(5) 0.4416(5) 0.7617(5) 0.097(3) Uani 1 1 d D . .
H93 H 0.5589 0.4573 0.7806 0.117 Uiso 1 1 calc R . .
C94 C 0.4671(6) 0.4329(5) 0.8022(5) 0.100(4) Uani 1 1 d D . .
H94 H 0.4689 0.4437 0.8493 0.119 Uiso 1 1 calc R . .
C95 C 0.4127(6) 0.4097(5) 0.7772(5) 0.095(3) Uani 1 1 d D . .
H95 H 0.3764 0.4043 0.8061 0.114 Uiso 1 1 calc R . .
C96 C 0.4100(4) 0.3932(4) 0.7066(4) 0.076(3) Uani 1 1 d D . .
H96 H 0.3717 0.3762 0.6888 0.092 Uiso 1 1 calc R . .
C101 C 0.5526(4) 0.4024(4) 0.5131(5) 0.062(2) Uani 1 1 d . . .
C102 C 0.6125(5) 0.3860(5) 0.5434(6) 0.091(3) Uani 1 1 d . . .
H102 H 0.6134 0.3614 0.5828 0.109 Uiso 1 1 calc R . .
C103 C 0.6707(5) 0.4066(6) 0.5142(8) 0.114(4) Uani 1 1 d . . .
H103 H 0.7106 0.3947 0.5336 0.136 Uiso 1 1 calc R . .
C104 C 0.6703(6) 0.4442(6) 0.4577(7) 0.102(4) Uani 1 1 d . . .
H104 H 0.7097 0.4570 0.4382 0.122 Uiso 1 1 calc R . .
C105 C 0.6136(5) 0.4625(5) 0.4305(6) 0.089(3) Uani 1 1 d . . .
H105 H 0.6135 0.4897 0.3933 0.107 Uiso 1 1 calc R . .
C106 C 0.5560(5) 0.4419(4) 0.4568(5) 0.075(3) Uani 1 1 d . . .
H106 H 0.5171 0.4548 0.4362 0.090 Uiso 1 1 calc R . .
O21 O 0.1677(5) 0.2500 0.5337(5) 0.095(3) Uani 1 2 d S . .
O31 O 0.3990(3) 0.4542(3) 0.4005(4) 0.098(2) Uani 1 1 d . . .
O32 O 0.2773(4) 0.3979(4) 0.5974(4) 0.098(2) Uani 1 1 d . . .
O41 O 0.5812(5) 0.2500 0.5775(8) 0.128(5) Uani 1 2 d S . .
O42 O 0.3881(7) 0.2500 0.6956(5) 0.123(5) Uani 1 2 d S . .
C1S C -0.041(3) 0.266(4) 0.551(3) 0.08(3) Uiso 0.13 1 d PD . 1
H1SA H -0.0868 0.2676 0.5398 0.126 Uiso 0.13 1 d PR . 1
H1SB H -0.0224 0.3059 0.5457 0.126 Uiso 0.13 1 d PR . 1
H1SC H -0.0190 0.2387 0.5205 0.126 Uiso 0.13 1 d PR . 1
C2S C -0.036(3) 0.2500 0.626(3) 0.15(3) Uiso 0.25 2 d SPD . 1
H2SA H -0.0537 0.2103 0.6330 0.185 Uiso 0.13 1 d PR . 1
H2SB H -0.0571 0.2773 0.6581 0.185 Uiso 0.13 1 d PR . 1
C3S C 0.032(3) 0.2500 0.647(3) 0.13(3) Uiso 0.25 2 d SPD . 1
H3SA H 0.0463 0.2911 0.6520 0.156 Uiso 0.13 1 d PR . 1
H3SB H 0.0527 0.2345 0.6053 0.156 Uiso 0.13 1 d PR . 1
C4S C 0.070(3) 0.2138(17) 0.695(3) 0.09(3) Uiso 0.13 1 d PD . 1
H4SA H 0.0952 0.1807 0.6775 0.113 Uiso 0.13 1 d PR . 1
H4SB H 0.0331 0.1971 0.7202 0.113 Uiso 0.13 1 d PR . 1
C5S C 0.108(3) 0.2500 0.745(3) 0.21(5) Uiso 0.25 2 d SPD . 1
H5SA H 0.1009 0.2338 0.7914 0.255 Uiso 0.13 1 d PR . 1
H5SB H 0.0924 0.2910 0.7458 0.255 Uiso 0.13 1 d PR . 1
C6S C 0.180(3) 0.2500 0.739(5) 0.17(4) Uiso 0.25 2 d SPD . 1
H6SA H 0.2023 0.2734 0.7743 0.249 Uiso 0.13 1 d PR . 1
H6SB H 0.1960 0.2093 0.7401 0.249 Uiso 0.13 1 d PR . 1
H6SC H 0.1874 0.2673 0.6939 0.249 Uiso 0.13 1 d PR . 1
C11S C 0.233(4) 0.2500 0.798(5) 0.19(4) Uiso 0.25 2 d SPD . 2
H11A H 0.2771 0.2628 0.8052 0.280 Uiso 0.13 1 d PR . 2
H11B H 0.2083 0.2545 0.8408 0.280 Uiso 0.13 1 d PR . 2
H11C H 0.2321 0.2084 0.7839 0.280 Uiso 0.13 1 d PR . 2
C12S C 0.182(3) 0.286(3) 0.759(6) 0.13(4) Uiso 0.13 1 d PD . 2
H12A H 0.2113 0.2816 0.7204 0.151 Uiso 0.13 1 d PR . 2
H12B H 0.1882 0.3264 0.7758 0.151 Uiso 0.13 1 d PR . 2
C13S C 0.141(2) 0.278(3) 0.723(3) 0.063(18) Uiso 0.13 1 d PD . 2
H13A H 0.1521 0.2858 0.6750 0.076 Uiso 0.13 1 d PR . 2
H13B H 0.1234 0.3150 0.7406 0.076 Uiso 0.13 1 d PR . 2
C14S C 0.076(3) 0.2500 0.7129(16) 0.252 Uiso 0.25 2 d SPD . 2
H14A H 0.0420 0.2642 0.7439 0.302 Uiso 0.13 1 d PR . 2
H14B H 0.0873 0.2097 0.7266 0.302 Uiso 0.13 1 d PR . 2
C15S C 0.0523 0.2500 0.6395 0.240 Uiso 0.25 2 d SPD . 2
H15A H 0.0702 0.2152 0.6165 0.288 Uiso 0.13 1 d PR . 2
H15B H 0.0702 0.2848 0.6165 0.288 Uiso 0.13 1 d PR . 2
C16S C 0.0000 0.2500 0.6125 0.15(3) Uiso 0.25 2 d SPD . 2
H16A H -0.0235 0.2500 0.5630 0.218 Uiso 0.25 2 d SPR . 2
H16B H -0.0340 0.2146 0.6334 0.218 Uiso 0.13 1 d PR . 2
H16C H -0.0340 0.2854 0.6334 0.218 Uiso 0.13 1 d PR . 2

loop_
  _atom_site_aniso_label
  _atom_site_aniso_U_11
  _atom_site_aniso_U_22
  _atom_site_aniso_U_33
  _atom_site_aniso_U_23
  _atom_site_aniso_U_13
  _atom_site_aniso_U_12
Ru1 0.0305(4) 0.0505(5) 0.0406(4) 0.000 0.0037(3) 0.000
Ru2 0.0299(4) 0.0422(4) 0.0389(4) 0.000 0.0023(3) 0.000
Ru3 0.0374(3) 0.0428(3) 0.0433(3) -0.0013(3) -0.0009(2) -0.0013(2)
Ru4 0.0410(5) 0.0486(5) 0.0415(5) 0.000 -0.0045(4) 0.000
Sn1 0.0375(4) 0.0599(5) 0.0531(5) 0.000 -0.0073(3) 0.000
Sn2 0.0411(3) 0.0452(3) 0.0512(3) 0.0034(2) -0.0010(2) 0.0030(2)
Sn3 0.0477(3) 0.0556(3) 0.0544(3) -0.0028(2) -0.0072(3) -0.0090(2)
C1 0.032(5) 0.037(5) 0.040(5) 0.000 0.007(4) 0.000
C2 0.055(5) 0.115(8) 0.063(6) 0.037(5) 0.023(4) 0.020(5)
C3 0.069(6) 0.061(6) 0.107(8) 0.000(6) 0.048(6) -0.012(5)
C4 0.047(5) 0.113(8) 0.066(6) -0.021(5) 0.012(4) -0.022(5)
C21 0.040(6) 0.068(8) 0.060(7) 0.000 0.021(6) 0.000
C31 0.063(6) 0.064(6) 0.066(6) 0.012(5) -0.008(5) -0.010(5)
C32 0.063(6) 0.065(6) 0.060(5) -0.013(4) 0.000(4) 0.010(4)
C41 0.072(9) 0.065(8) 0.086(10) 0.000 -0.031(8) 0.000
C42 0.099(10) 0.061(8) 0.050(7) 0.000 0.015(7) 0.000
C51 0.062(8) 0.100(10) 0.045(7) 0.000 -0.011(6) 0.000
C52 0.068(12) 0.47(5) 0.055(11) 0.000 -0.004(9) 0.000
C53 0.078(14) 0.75(8) 0.057(12) 0.000 0.011(11) 0.000
C54 0.13(2) 0.36(4) 0.068(13) 0.000 0.050(14) 0.000
C55 0.099(14) 0.24(3) 0.057(10) 0.000 -0.008(10) 0.000
C56 0.055(8) 0.180(17) 0.062(9) 0.000 -0.021(7) 0.000
C61 0.048(5) 0.066(6) 0.087(7) -0.015(5) -0.022(5) 0.003(4)
C62 0.099(8) 0.060(6) 0.089(7) -0.003(5) -0.030(6) 0.003(5)
C63 0.133(11) 0.063(7) 0.115(10) -0.013(6) -0.038(9) 0.027(7)
C64 0.088(9) 0.077(8) 0.151(13) -0.024(8) -0.026(8) 0.034(7)
C65 0.090(9) 0.108(11) 0.199(17) 0.002(11) 0.049(10) 0.029(8)
C66 0.083(8) 0.114(9) 0.139(11) 0.032(8) 0.031(8) 0.046(7)
C71 0.048(5) 0.066(5) 0.061(5) 0.014(4) -0.006(4) -0.007(4)
C72 0.151(13) 0.264(19) 0.109(10) 0.104(12) 0.066(10) 0.136(14)
C73 0.125(12) 0.35(3) 0.142(13) 0.152(16) 0.080(10) 0.122(15)
C74 0.105(10) 0.157(13) 0.083(9) 0.053(9) 0.001(7) -0.026(9)
C75 0.33(3) 0.107(11) 0.100(11) 0.046(9) 0.050(14) 0.053(14)
C76 0.262(19) 0.084(9) 0.101(9) 0.037(7) 0.047(11) 0.066(10)
C81 0.054(5) 0.058(5) 0.067(5) -0.009(4) -0.008(4) 0.013(4)
C82 0.137(12) 0.088(9) 0.192(15) -0.022(9) 0.106(11) 0.011(8)
C83 0.128(13) 0.137(14) 0.215(18) -0.055(13) 0.096(12) -0.012(11)
C84 0.118(12) 0.158(15) 0.103(10) -0.051(10) -0.005(8) 0.072(11)
C85 0.199(18) 0.116(12) 0.153(15) 0.008(10) 0.037(13) 0.092(12)
C86 0.162(13) 0.084(8) 0.109(9) 0.012(7) 0.044(9) 0.047(8)
C91 0.071(6) 0.052(5) 0.062(5) -0.011(4) -0.008(5) -0.004(4)
C92 0.083(7) 0.076(6) 0.074(6) -0.015(5) -0.019(5) -0.001(5)
C93 0.096(8) 0.108(9) 0.088(8) -0.022(7) -0.036(7) -0.003(7)
C94 0.136(11) 0.087(8) 0.075(7) -0.019(6) -0.028(8) 0.000(8)
C95 0.130(10) 0.089(8) 0.066(7) -0.010(6) 0.000(7) -0.003(7)
C96 0.085(7) 0.076(6) 0.068(6) -0.010(5) -0.019(6) -0.001(5)
C101 0.049(5) 0.061(5) 0.078(6) -0.001(4) -0.003(4) -0.011(4)
C102 0.059(6) 0.092(8) 0.121(9) 0.018(7) 0.000(6) -0.016(6)
C103 0.040(6) 0.112(10) 0.189(14) 0.021(9) 0.010(7) 0.000(6)
C104 0.068(8) 0.109(10) 0.128(10) 0.008(8) 0.027(7) -0.012(7)
C105 0.080(7) 0.099(8) 0.088(7) 0.001(6) 0.010(6) -0.033(7)
C106 0.082(7) 0.062(6) 0.080(7) -0.005(5) -0.002(5) -0.019(5)
O21 0.092(7) 0.095(7) 0.097(7) 0.000 0.059(6) 0.000
O31 0.098(5) 0.083(5) 0.114(6) 0.042(4) -0.034(4) -0.039(4)
O32 0.094(5) 0.126(6) 0.074(5) -0.036(4) -0.001(4) 0.041(5)
O41 0.063(7) 0.080(7) 0.242(15) 0.000 -0.078(8) 0.000
O42 0.220(14) 0.088(8) 0.061(6) 0.000 0.044(8) 0.000

_geom_special_details
;
  All esds (except the esd in the dihedral angle between two l.s. planes)
  are estimated using the full covariance matrix.  The cell esds are taken
  into account individually in the estimation of esds in distances, angles
  and torsion angles; correlations between esds in cell parameters are only
  used when they are defined by crystal symmetry.  An approximate (isotropic)
  treatment of cell esds is used for estimating esds involving l.s. planes.
;

loop_
  _geom_bond_atom_site_label_1
  _geom_bond_atom_site_label_2
  _geom_bond_distance
  _geom_bond_site_symmetry_2
  _geom_bond_publ_flag
Ru1 C1 2.065(9) . ?
Ru1 C4 2.220(8) 7_565 ?
Ru1 C4 2.220(8) . ?
Ru1 C2 2.236(8) 7_565 ?
Ru1 C2 2.236(8) . ?
Ru1 C3 2.253(8) 7_565 ?
Ru1 C3 2.253(8) . ?
Ru1 Ru3 2.8208(8) . ?
Ru1 Ru3 2.8208(8) 7_565 ?
Ru1 Ru4 2.8517(11) . ?
Ru1 Ru2 2.9290(11) . ?
Ru2 C21 1.853(11) . ?
Ru2 C1 2.037(9) . ?
Ru2 Sn2 2.6198(5) 7_565 ?
Ru2 Sn2 2.6198(5) . ?
Ru2 Sn1 2.7559(10) . ?
Ru2 Ru3 2.9117(8) . ?
Ru2 Ru3 2.9117(8) 7_565 ?
Ru3 C32 1.864(9) . ?
Ru3 C31 1.900(9) . ?
Ru3 C1 2.0519(8) . ?
Ru3 Sn3 2.6125(8) . ?
Ru3 Sn2 2.7106(8) . ?
Ru3 Ru4 2.8670(8) . ?
Ru4 C42 1.859(13) . ?
Ru4 C41 1.874(14) . ?
Ru4 C1 2.033(9) . ?
Ru4 Sn3 2.6715(6) 7_565 ?
Ru4 Sn3 2.6715(6) . ?
Ru4 Ru3 2.8670(8) 7_565 ?
Sn1 C51 2.143(10) . ?
Sn1 C61 2.198(9) . ?
Sn1 C61 2.198(9) 7_565 ?
Sn2 C71 2.153(7) . ?
Sn2 C81 2.153(7) . ?
Sn3 C91 2.161(7) . ?
Sn3 C101 2.165(8) . ?
C1 Ru3 2.0519(8) 7_565 ?
C2 C2 1.39(2) 7_565 ?
C2 C3 1.405(14) . ?
C3 C4 1.351(13) . ?
C4 C4 1.33(2) 7_565 ?
C21 O21 1.116(12) . ?
C31 O31 1.144(10) . ?
C32 O32 1.143(9) . ?
C41 O41 1.148(15) . ?
C42 O42 1.128(14) . ?
C51 C52 1.341(10) . ?
C51 C56 1.355(9) . ?
C52 C53 1.366(10) . ?
C53 C54 1.342(12) . ?
C54 C55 1.301(12) . ?
C55 C56 1.394(10) . ?
C61 C62 1.372(13) . ?
C61 C66 1.394(14) . ?
C62 C63 1.383(14) . ?
C63 C64 1.322(17) . ?
C64 C65 1.373(18) . ?
C65 C66 1.355(15) . ?
C71 C72 1.333(9) . ?
C71 C76 1.361(9) . ?
C72 C73 1.372(10) . ?
C73 C74 1.335(12) . ?
C74 C75 1.301(11) . ?
C75 C76 1.395(10) . ?
C81 C82 1.342(9) . ?
C81 C86 1.358(9) . ?
C82 C83 1.367(10) . ?
C83 C84 1.334(11) . ?
C84 C85 1.304(11) . ?
C85 C86 1.392(10) . ?
C91 C92 1.353(8) . ?
C91 C96 1.363(9) . ?
C92 C93 1.375(9) . ?
C93 C94 1.347(11) . ?
C94 C95 1.312(11) . ?
C95 C96 1.396(9) . ?
C101 C106 1.387(12) . ?
C101 C102 1.399(13) . ?
C102 C103 1.386(14) . ?
C103 C104 1.361(16) . ?
C104 C105 1.330(15) . ?
C105 C106 1.356(13) . ?
C1S C1S 0.73(16) 7_565 ?
C1S C2S 1.48(2) . ?
C2S C3S 1.44(2) . ?
C2S C1S 1.48(2) 7_565 ?
C3S C4S 1.44(2) 7_565 ?
C3S C4S 1.44(2) . ?
C4S C5S 1.47(2) . ?
C4S C4S 1.60(7) 7_565 ?
C5S C4S 1.47(2) 7_565 ?
C5S C6S 1.48(2) . ?
C11S C12S 1.50(2) 7_565 ?
C11S C12S 1.50(2) . ?
C12S C13S 1.08(5) . ?
C12S C12S 1.60(15) 7_565 ?
C12S C13S 1.77(10) 7_565 ?
C13S C13S 1.24(12) 7_565 ?
C13S C14S 1.48(2) . ?
C13S C12S 1.77(10) 7_565 ?
C14S C15S 1.48(2) . ?
C14S C13S 1.48(2) 7_565 ?
C15S C16S 1.1823 . ?

loop_
  _geom_angle_atom_site_label_1
  _geom_angle_atom_site_label_2
  _geom_angle_atom_site_label_3
  _geom_angle
  _geom_angle_site_symmetry_1
  _geom_angle_site_symmetry_3
  _geom_angle_publ_flag
C1 Ru1 C4 127.3(3) . 7_565 ?
C1 Ru1 C4 127.3(3) . . ?
C4 Ru1 C4 35.0(5) 7_565 . ?
C1 Ru1 C2 154.9(3) . 7_565 ?
C4 Ru1 C2 64.6(3) 7_565 7_565 ?
C4 Ru1 C2 76.0(3) . 7_565 ?
C1 Ru1 C2 154.9(3) . . ?
C4 Ru1 C2 76.0(3) 7_565 . ?
C4 Ru1 C2 64.6(3) . . ?
C2 Ru1 C2 36.2(5) 7_565 . ?
C1 Ru1 C3 139.1(3) . 7_565 ?
C4 Ru1 C3 35.2(3) 7_565 7_565 ?
C4 Ru1 C3 63.2(4) . 7_565 ?
C2 Ru1 C3 36.5(4) 7_565 7_565 ?
C2 Ru1 C3 64.8(4) . 7_565 ?
C1 Ru1 C3 139.1(3) . . ?
C4 Ru1 C3 63.2(4) 7_565 . ?
C4 Ru1 C3 35.2(3) . . ?
C2 Ru1 C3 64.8(4) 7_565 . ?
C2 Ru1 C3 36.5(4) . . ?
C3 Ru1 C3 75.1(5) 7_565 . ?
C1 Ru1 Ru3 46.558(17) . . ?
C4 Ru1 Ru3 128.9(3) 7_565 . ?
C4 Ru1 Ru3 101.1(2) . . ?
C2 Ru1 Ru3 148.3(3) 7_565 . ?
C2 Ru1 Ru3 113.6(3) . . ?
C3 Ru1 Ru3 163.7(3) 7_565 . ?
C3 Ru1 Ru3 94.3(2) . . ?
C1 Ru1 Ru3 46.558(17) . 7_565 ?
C4 Ru1 Ru3 101.1(2) 7_565 7_565 ?
C4 Ru1 Ru3 128.9(3) . 7_565 ?
C2 Ru1 Ru3 113.6(3) 7_565 7_565 ?
C2 Ru1 Ru3 148.3(3) . 7_565 ?
C3 Ru1 Ru3 94.3(2) 7_565 7_565 ?
C3 Ru1 Ru3 163.7(3) . 7_565 ?
Ru3 Ru1 Ru3 93.11(3) . 7_565 ?
C1 Ru1 Ru4 45.4(3) . . ?
C4 Ru1 Ru4 84.3(3) 7_565 . ?
C4 Ru1 Ru4 84.3(3) . . ?
C2 Ru1 Ru4 147.3(3) 7_565 . ?
C2 Ru1 Ru4 147.3(3) . . ?
C3 Ru1 Ru4 111.1(3) 7_565 . ?
C3 Ru1 Ru4 111.1(3) . . ?
Ru3 Ru1 Ru4 60.71(2) . . ?
Ru3 Ru1 Ru4 60.71(2) 7_565 . ?
C1 Ru1 Ru2 44.1(3) . . ?
C4 Ru1 Ru2 161.4(2) 7_565 . ?
C4 Ru1 Ru2 161.4(2) . . ?
C2 Ru1 Ru2 116.7(2) 7_565 . ?
C2 Ru1 Ru2 116.7(2) . . ?
C3 Ru1 Ru2 135.2(3) 7_565 . ?
C3 Ru1 Ru2 135.2(3) . . ?
Ru3 Ru1 Ru2 60.82(2) . . ?
Ru3 Ru1 Ru2 60.82(2) 7_565 . ?
Ru4 Ru1 Ru2 89.50(3) . . ?
C21 Ru2 C1 100.8(4) . . ?
C21 Ru2 Sn2 89.93(9) . 7_565 ?
C1 Ru2 Sn2 103.19(2) . 7_565 ?
C21 Ru2 Sn2 89.93(9) . . ?
C1 Ru2 Sn2 103.19(2) . . ?
Sn2 Ru2 Sn2 153.16(4) 7_565 . ?
C21 Ru2 Sn1 92.6(4) . . ?
C1 Ru2 Sn1 166.6(2) . . ?
Sn2 Ru2 Sn1 76.60(2) 7_565 . ?
Sn2 Ru2 Sn1 76.60(2) . . ?
C21 Ru2 Ru3 100.1(3) . . ?
C1 Ru2 Ru3 44.80(2) . . ?
Sn2 Ru2 Ru3 147.59(3) 7_565 . ?
Sn2 Ru2 Ru3 58.399(17) . . ?
Sn1 Ru2 Ru3 132.873(18) . . ?
C21 Ru2 Ru3 100.1(3) . 7_565 ?
C1 Ru2 Ru3 44.80(2) . 7_565 ?
Sn2 Ru2 Ru3 58.399(17) 7_565 7_565 ?
Sn2 Ru2 Ru3 147.59(3) . 7_565 ?
Sn1 Ru2 Ru3 132.873(18) . 7_565 ?
Ru3 Ru2 Ru3 89.39(3) . 7_565 ?
C21 Ru2 Ru1 145.6(4) . . ?
C1 Ru2 Ru1 44.8(2) . . ?
Sn2 Ru2 Ru1 97.59(2) 7_565 . ?
Sn2 Ru2 Ru1 97.59(2) . . ?
Sn1 Ru2 Ru1 121.80(4) . . ?
Ru3 Ru2 Ru1 57.756(19) . . ?
Ru3 Ru2 Ru1 57.756(19) 7_565 . ?
C32 Ru3 C31 100.3(4) . . ?
C32 Ru3 C1 110.4(4) . . ?
C31 Ru3 C1 148.7(4) . . ?
C32 Ru3 Sn3 87.6(3) . . ?
C31 Ru3 Sn3 83.2(3) . . ?
C1 Ru3 Sn3 103.3(3) . . ?
C32 Ru3 Sn2 84.1(3) . . ?
C31 Ru3 Sn2 77.1(3) . . ?
C1 Ru3 Sn2 99.8(3) . . ?
Sn3 Ru3 Sn2 156.92(3) . . ?
C32 Ru3 Ru1 157.4(3) . . ?
C31 Ru3 Ru1 102.2(3) . . ?
C1 Ru3 Ru1 46.9(2) . . ?
Sn3 Ru3 Ru1 97.78(3) . . ?
Sn2 Ru3 Ru1 98.14(3) . . ?
C32 Ru3 Ru4 105.9(3) . . ?
C31 Ru3 Ru4 131.3(3) . . ?
C1 Ru3 Ru4 45.2(3) . . ?
Sn3 Ru3 Ru4 58.14(2) . . ?
Sn2 Ru3 Ru4 144.94(3) . . ?
Ru1 Ru3 Ru4 60.18(2) . . ?
C32 Ru3 Ru2 103.2(3) . . ?
C31 Ru3 Ru2 123.4(3) . . ?
C1 Ru3 Ru2 44.4(3) . . ?
Sn3 Ru3 Ru2 147.68(3) . . ?
Sn2 Ru3 Ru2 55.406(18) . . ?
Ru1 Ru3 Ru2 61.43(2) . . ?
Ru4 Ru3 Ru2 89.54(2) . . ?
C42 Ru4 C41 96.8(6) . . ?
C42 Ru4 C1 106.2(5) . . ?
C41 Ru4 C1 157.0(5) . . ?
C42 Ru4 Sn3 89.95(10) . 7_565 ?
C41 Ru4 Sn3 77.76(3) . 7_565 ?
C1 Ru4 Sn3 101.85(3) . 7_565 ?
C42 Ru4 Sn3 89.95(10) . . ?
C41 Ru4 Sn3 77.76(3) . . ?
C1 Ru4 Sn3 101.85(3) . . ?
Sn3 Ru4 Sn3 155.33(4) 7_565 . ?
C42 Ru4 Ru1 152.6(4) . . ?
C41 Ru4 Ru1 110.6(5) . . ?
C1 Ru4 Ru1 46.4(2) . . ?
Sn3 Ru4 Ru1 95.69(2) 7_565 . ?
Sn3 Ru4 Ru1 95.69(2) . . ?
C42 Ru4 Ru3 103.7(3) . 7_565 ?
C41 Ru4 Ru3 128.75(18) . 7_565 ?
C1 Ru4 Ru3 45.70(2) . 7_565 ?
Sn3 Ru4 Ru3 56.156(17) 7_565 7_565 ?
Sn3 Ru4 Ru3 147.00(3) . 7_565 ?
Ru1 Ru4 Ru3 59.11(2) . 7_565 ?
C42 Ru4 Ru3 103.7(3) . . ?
C41 Ru4 Ru3 128.75(18) . . ?
C1 Ru4 Ru3 45.70(2) . . ?
Sn3 Ru4 Ru3 147.00(3) 7_565 . ?
Sn3 Ru4 Ru3 56.156(17) . . ?
Ru1 Ru4 Ru3 59.11(2) . . ?
Ru3 Ru4 Ru3 91.17(3) 7_565 . ?
C51 Sn1 C61 103.6(3) . . ?
C51 Sn1 C61 103.6(3) . 7_565 ?
C61 Sn1 C61 96.7(5) . 7_565 ?
C51 Sn1 Ru2 117.0(3) . . ?
C61 Sn1 Ru2 116.6(2) . . ?
C61 Sn1 Ru2 116.6(2) 7_565 . ?
C71 Sn2 C81 103.4(3) . . ?
C71 Sn2 Ru2 127.5(2) . . ?
C81 Sn2 Ru2 125.8(2) . . ?
C71 Sn2 Ru3 114.4(2) . . ?
C81 Sn2 Ru3 111.8(2) . . ?
Ru2 Sn2 Ru3 66.20(2) . . ?
C91 Sn3 C101 103.7(3) . . ?
C91 Sn3 Ru3 126.0(2) . . ?
C101 Sn3 Ru3 123.7(2) . . ?
C91 Sn3 Ru4 113.8(2) . . ?
C101 Sn3 Ru4 119.5(2) . . ?
Ru3 Sn3 Ru4 65.71(2) . . ?
Ru4 C1 Ru2 179.3(5) . . ?
Ru4 C1 Ru3 89.2(3) . 7_565 ?
Ru2 C1 Ru3 90.8(3) . 7_565 ?
Ru4 C1 Ru3 89.2(3) . . ?
Ru2 C1 Ru3 90.8(3) . . ?
Ru3 C1 Ru3 172.8(5) 7_565 . ?
Ru4 C1 Ru1 88.2(3) . . ?
Ru2 C1 Ru1 91.1(4) . . ?
Ru3 C1 Ru1 86.5(2) 7_565 . ?
Ru3 C1 Ru1 86.5(2) . . ?
C2 C2 C3 118.9(6) 7_565 . ?
C2 C2 Ru1 71.9(3) 7_565 . ?
C3 C2 Ru1 72.4(5) . . ?
C4 C3 C2 119.5(9) . . ?
C4 C3 Ru1 71.1(5) . . ?
C2 C3 Ru1 71.1(5) . . ?
C4 C4 C3 121.5(6) 7_565 . ?
C4 C4 Ru1 72.5(3) 7_565 . ?
C3 C4 Ru1 73.7(5) . . ?
O21 C21 Ru2 178.8(12) . . ?
O31 C31 Ru3 177.7(9) . . ?
O32 C32 Ru3 179.4(9) . . ?
O41 C41 Ru4 178.1(15) . . ?
O42 C42 Ru4 178.7(15) . . ?
C52 C51 C56 116.7(9) . . ?
C52 C51 Sn1 121.7(8) . . ?
C56 C51 Sn1 121.6(8) . . ?
C51 C52 C53 121.9(10) . . ?
C54 C53 C52 119.4(11) . . ?
C55 C54 C53 121.4(11) . . ?
C54 C55 C56 118.7(10) . . ?
C51 C56 C55 121.8(10) . . ?
C62 C61 C66 118.5(9) . . ?
C62 C61 Sn1 122.6(8) . . ?
C66 C61 Sn1 118.7(7) . . ?
C61 C62 C63 119.1(12) . . ?
C64 C63 C62 121.4(12) . . ?
C63 C64 C65 120.9(11) . . ?
C66 C65 C64 119.1(13) . . ?
C65 C66 C61 121.0(12) . . ?
C72 C71 C76 114.6(7) . . ?
C72 C71 Sn2 121.5(6) . . ?
C76 C71 Sn2 122.9(6) . . ?
C71 C72 C73 123.1(9) . . ?
C74 C73 C72 119.9(9) . . ?
C75 C74 C73 119.0(9) . . ?
C74 C75 C76 120.5(10) . . ?
C71 C76 C75 121.4(9) . . ?
C82 C81 C86 114.7(7) . . ?
C82 C81 Sn2 124.3(6) . . ?
C86 C81 Sn2 120.7(6) . . ?
C81 C82 C83 123.6(9) . . ?
C84 C83 C82 119.5(10) . . ?
C85 C84 C83 119.6(9) . . ?
C84 C85 C86 120.5(10) . . ?
C81 C86 C85 121.7(9) . . ?
C92 C91 C96 117.1(7) . . ?
C92 C91 Sn3 121.4(6) . . ?
C96 C91 Sn3 121.2(5) . . ?
C91 C92 C93 122.1(8) . . ?
C94 C93 C92 118.5(8) . . ?
C95 C94 C93 122.0(9) . . ?
C94 C95 C96 119.1(9) . . ?
C91 C96 C95 121.1(8) . . ?
C106 C101 C102 116.1(9) . . ?
C106 C101 Sn3 124.5(7) . . ?
C102 C101 Sn3 119.4(7) . . ?
C103 C102 C101 119.7(11) . . ?
C104 C103 C102 120.9(11) . . ?
C105 C104 C103 120.1(11) . . ?
C104 C105 C106 120.3(11) . . ?
C105 C106 C101 122.8(10) . . ?
C1S C1S C2S 76(3) 7_565 . ?
C3S C2S C1S 109(3) . 7_565 ?
C3S C2S C1S 109(3) . . ?
C1S C2S C1S 28(6) 7_565 . ?
C4S C3S C4S 68(3) 7_565 . ?
C4S C3S C2S 133(4) 7_565 . ?
C4S C3S C2S 133(4) . . ?
C3S C4S C5S 113(3) . . ?
C3S C4S C4S 56.0(16) . 7_565 ?
C5S C4S C4S 56.9(16) . 7_565 ?
C4S C5S C4S 66(3) . 7_565 ?
C4S C5S C6S 118(3) . . ?
C4S C5S C6S 118(3) 7_565 . ?
C12S C11S C12S 64(6) 7_565 . ?
C13S C12S C11S 138(7) . . ?
C13S C12S C12S 80(4) . 7_565 ?
C11S C12S C12S 58(3) . 7_565 ?
C13S C12S C13S 43(4) . 7_565 ?
C11S C12S C13S 95(5) . 7_565 ?
C12S C12S C13S 37(2) 7_565 7_565 ?
C12S C13S C13S 100(4) . 7_565 ?
C12S C13S C14S 146(7) . . ?
C13S C13S C14S 65(3) 7_565 . ?
C12S C13S C12S 62(4) . 7_565 ?
C13S C13S C12S 37.1(19) 7_565 7_565 ?
C14S C13S C12S 98(4) . 7_565 ?
C15S C14S C13S 115(3) . 7_565 ?
C15S C14S C13S 115(3) . . ?
C13S C14S C13S 49(5) 7_565 . ?
C16S C15S C14S 135(2) . . ?

_diffrn_measured_fraction_theta_max    1.000
_diffrn_reflns_theta_full              25.03
_diffrn_measured_fraction_theta_full   1.000
_refine_diff_density_max    0.952
_refine_diff_density_min   -0.721
_refine_diff_density_rms    0.148

#===END

Compound 9


data_ru5sndt

_audit_creation_method            SHELXL-97
_chemical_name_systematic
;
  ?
;
_chemical_name_common             ?
_chemical_melting_point           ?
_chemical_formula_moiety          ?
_chemical_formula_sum
  'C64 H42 O23 Ru10 Sn2'
_chemical_formula_weight          2427.06

loop_
  _atom_type_symbol
  _atom_type_description
  _atom_type_scat_dispersion_real
  _atom_type_scat_dispersion_imag
  _atom_type_scat_source
  'C'  'C'   0.0033   0.0016
  'International Tables Vol C Tables 4.2.6.8 and 6.1.1.4'
  'H'  'H'   0.0000   0.0000
  'International Tables Vol C Tables 4.2.6.8 and 6.1.1.4'
  'O'  'O'   0.0106   0.0060
  'International Tables Vol C Tables 4.2.6.8 and 6.1.1.4'
  'Ru'  'Ru'  -1.2594   0.8363
  'International Tables Vol C Tables 4.2.6.8 and 6.1.1.4'
  'Sn'  'Sn'  -0.6537   1.4246
  'International Tables Vol C Tables 4.2.6.8 and 6.1.1.4'

_symmetry_cell_setting            Triclinic
_symmetry_space_group_name_H-M    P-1

loop_
  _symmetry_equiv_pos_as_xyz
  'x, y, z'
  '-x, -y, -z'

_cell_length_a                    9.7219(7)
_cell_length_b                    17.0961(12)
_cell_length_c                    23.3176(16)
_cell_angle_alpha                 70.876(2)
_cell_angle_beta                  83.645(2)
_cell_angle_gamma                 76.101(2)
_cell_volume                      3552.3(4)
_cell_formula_units_Z             2
_cell_measurement_temperature     293(2)
_cell_measurement_reflns_used     5303
_cell_measurement_theta_min       2.21
_cell_measurement_theta_max       25.06

_exptl_crystal_description        plate
_exptl_crystal_colour             red
_exptl_crystal_size_max           ?
_exptl_crystal_size_mid           ?
_exptl_crystal_size_min           ?
_exptl_crystal_density_meas       ?
_exptl_crystal_density_diffrn     2.269
_exptl_crystal_density_method     'not measured'
_exptl_crystal_F_000              2300
_exptl_absorpt_coefficient_mu     2.822
_exptl_absorpt_correction_type    SADABS
_exptl_absorpt_correction_T_min   0.559
_exptl_absorpt_correction_T_max   0.693
_exptl_absorpt_process_details    '(SADABS, Bruker, 1997)'

_exptl_special_details
;
  ?
;

_diffrn_ambient_temperature       293(2)
_diffrn_radiation_wavelength      0.71073
_diffrn_radiation_type            MoK\a
_diffrn_radiation_source          'fine-focus sealed tube'
_diffrn_radiation_monochromator   graphite
_diffrn_measurement_device_type   'Bruker SMART APEX CCD diffractometer'
_diffrn_measurement_method        'omega scans'
_diffrn_detector_area_resol_mean  ?
_diffrn_standards_number          ?
_diffrn_standards_interval_count  ?
_diffrn_standards_interval_time   ?
_diffrn_standards_decay_%         <1
_diffrn_reflns_number             22621
_diffrn_reflns_av_R_equivalents   0.0731
_diffrn_reflns_av_sigmaI/netI     0.1770
_diffrn_reflns_limit_h_min        -11
_diffrn_reflns_limit_h_max        11
_diffrn_reflns_limit_k_min        -16
_diffrn_reflns_limit_k_max        20
_diffrn_reflns_limit_l_min        -26
_diffrn_reflns_limit_l_max        27
_diffrn_reflns_theta_min          1.81
_diffrn_reflns_theta_max          25.09
_reflns_number_total              12589
_reflns_number_gt                 6033
_reflns_threshold_expression      >2sigma(I)

_computing_data_collection        'SMART NT V5.619 (Bruker, 2000)'
_computing_cell_refinement        'SAINT+ NT V6.02a (Bruker, 1998)'
_computing_data_reduction         'SAINT+ NT V6.02a'
_computing_structure_solution     'SHELXS-97 (Sheldrick, 1990)'
_computing_structure_refinement   'SHELXL-97 (Sheldrick, 1997)'
_computing_molecular_graphics     'SHELXTL V5.1 (Sheldrick, 1997)'
_computing_publication_material   'SHELXTL V5.1'

_refine_special_details
;
  Refinement of F^2^ against ALL reflections.  The weighted R-factor wR and
  goodness of fit S are based on F^2^, conventional R-factors R are based
  on F, with F set to zero for negative F^2^. The threshold expression of
  F^2^ > 2sigma(F^2^) is used only for calculating R-factors(gt) etc. and is
  not relevant to the choice of reflections for refinement.  R-factors based
  on F^2^ are statistically about twice as large as those based on F, and R-
  factors based on ALL data will be even larger.
;

_refine_ls_structure_factor_coef  Fsqd
_refine_ls_matrix_type            full
_refine_ls_weighting_scheme       calc
_refine_ls_weighting_details
; calc
  [0.00000+1.00000exp(3.60(sin\q/\l)^2^)]/
    [\s^2^(Fo^2^)+0.0000+0.0000*P+(0.0143P)^2^+0.0000sin\q/\l]
  where P = 0.33333Fo^2^ + 0.66667Fc^2^
;
_atom_sites_solution_primary      direct
_atom_sites_solution_secondary    difmap
_atom_sites_solution_hydrogens    geom
_refine_ls_hydrogen_treatment     mixed
_refine_ls_extinction_method      none
_refine_ls_extinction_coef        ?
_refine_ls_number_reflns          12589
_refine_ls_number_parameters      894
_refine_ls_number_restraints      0
_refine_ls_R_factor_all           0.1129
_refine_ls_R_factor_gt            0.0496
_refine_ls_wR_factor_ref          0.1105
_refine_ls_wR_factor_gt           0.0894
_refine_ls_goodness_of_fit_ref    1.003
_refine_ls_restrained_S_all       1.003
_refine_ls_shift/su_max           0.001
_refine_ls_shift/su_mean          0.000

loop_
  _atom_site_label
  _atom_site_type_symbol
  _atom_site_fract_x
  _atom_site_fract_y
  _atom_site_fract_z
  _atom_site_U_iso_or_equiv
  _atom_site_adp_type
  _atom_site_occupancy
  _atom_site_symmetry_multiplicity
  _atom_site_calc_flag
  _atom_site_refinement_flags
  _atom_site_disorder_assembly
  _atom_site_disorder_group
Ru1 Ru 0.65030(9) 0.83757(6) 0.17811(5) 0.0332(2) Uani 1 1 d . . .
Ru2 Ru 0.86438(10) 0.70136(6) 0.23627(5) 0.0321(2) Uani 1 1 d . . .
Ru3 Ru 1.04285(10) 0.71709(6) 0.12814(5) 0.0347(3) Uani 1 1 d . . .
Ru4 Ru 0.82046(10) 0.86206(6) 0.06616(5) 0.0379(3) Uani 1 1 d . . .
Ru5 Ru 0.91994(9) 0.86150(6) 0.17493(5) 0.0321(2) Uani 1 1 d . . .
Ru6 Ru -0.01909(10) 0.31127(6) 0.28859(5) 0.0384(3) Uani 1 1 d . . .
Ru7 Ru 0.21768(11) 0.23505(7) 0.22963(5) 0.0424(3) Uani 1 1 d . . .
Ru8 Ru 0.30894(10) 0.10364(6) 0.33762(5) 0.0425(3) Uani 1 1 d . . .
Ru9 Ru 0.06157(11) 0.17690(7) 0.40179(5) 0.0427(3) Uani 1 1 d . . .
Ru10 Ru 0.01670(11) 0.14515(7) 0.29595(5) 0.0454(3) Uani 1 1 d . . .
Sn1 Sn 0.77252(8) 0.71055(5) 0.13316(4) 0.0361(2) Uani 1 1 d . . .
Sn2 Sn 0.24160(9) 0.26644(5) 0.33000(4) 0.0396(2) Uani 1 1 d . . .
O21 O 0.6567(10) 0.5968(6) 0.3018(4) 0.062(3) Uani 1 1 d . . .
O22 O 1.0538(10) 0.6093(7) 0.3422(5) 0.079(3) Uani 1 1 d . . .
O31 O 1.0811(11) 0.5559(6) 0.0974(5) 0.080(3) Uani 1 1 d . . .
O32 O 1.2844(9) 0.7654(6) 0.0401(5) 0.062(3) Uani 1 1 d . . .
O33 O 1.2513(10) 0.6416(7) 0.2287(4) 0.068(3) Uani 1 1 d . . .
O41 O 0.5985(11) 0.8523(7) -0.0098(5) 0.084(4) Uani 1 1 d . . .
O42 O 1.0255(10) 0.8797(7) -0.0423(4) 0.075(3) Uani 1 1 d . . .
O43 O 0.6961(10) 1.0503(7) 0.0404(5) 0.076(3) Uani 1 1 d . . .
O51 O 1.1365(10) 0.9297(6) 0.0783(4) 0.056(3) Uani 1 1 d . . .
O52 O 0.7877(10) 1.0469(6) 0.1644(5) 0.067(3) Uani 1 1 d . . .
O53 O 1.1260(10) 0.8290(7) 0.2742(5) 0.076(3) Uani 1 1 d . . .
O71 O 0.3118(15) 0.3932(8) 0.1540(6) 0.118(5) Uani 1 1 d . . .
O72 O 0.3126(18) 0.1656(10) 0.1253(6) 0.159(8) Uani 1 1 d . . .
O81 O 0.5176(11) 0.0757(7) 0.4321(5) 0.086(4) Uani 1 1 d . . .
O82 O 0.3342(11) -0.0868(7) 0.3683(7) 0.107(5) Uani 1 1 d . . .
O83 O 0.5383(10) 0.0996(6) 0.2401(5) 0.078(3) Uani 1 1 d . . .
O91 O 0.0909(11) 0.2825(8) 0.4774(5) 0.087(4) Uani 1 1 d . . .
O92 O 0.1882(11) 0.0172(7) 0.4974(5) 0.085(4) Uani 1 1 d . . .
O93 O -0.2471(11) 0.1826(7) 0.4423(6) 0.091(4) Uani 1 1 d . . .
O101 O 0.0186(11) -0.0205(6) 0.3986(5) 0.077(3) Uani 1 1 d . . .
O102 O 0.0951(13) 0.0415(8) 0.2088(6) 0.106(5) Uani 1 1 d . . .
O103 O -0.3047(11) 0.1791(7) 0.3056(6) 0.097(4) Uani 1 1 d . . .
C1 C 0.7802(12) 0.8100(7) 0.2503(6) 0.036(3) Uani 1 1 d . . .
C2 C 0.0072(13) 0.2565(8) 0.2195(6) 0.048(4) Uani 1 1 d . . .
C3 C 0.4661(13) 0.9215(11) 0.1189(7) 0.063(5) Uani 1 1 d . . .
H3 H 0.4656 0.9494 0.0773 0.076 Uiso 1 1 calc R . .
C4 C 0.4445(13) 0.8369(13) 0.1420(9) 0.079(6) Uani 1 1 d . . .
H4 H 0.4299 0.8087 0.1159 0.095 Uiso 1 1 calc R . .
C5 C 0.4460(12) 0.7961(9) 0.2073(10) 0.070(5) Uani 1 1 d . . .
H5 H 0.4335 0.7408 0.2242 0.084 Uiso 1 1 calc R . .
C6 C 0.4664(13) 0.8417(10) 0.2432(7) 0.051(4) Uani 1 1 d . . .
H6 H 0.4658 0.8169 0.2851 0.061 Uiso 1 1 calc R . .
C7 C 0.4873(13) 0.9213(11) 0.2195(8) 0.064(5) Uani 1 1 d . . .
H7 H 0.5021 0.9495 0.2455 0.077 Uiso 1 1 calc R . .
C8 C 0.4875(13) 0.9617(9) 0.1586(8) 0.057(4) Uani 1 1 d . . .
H8 H 0.5021 1.0167 0.1436 0.068 Uiso 1 1 calc R . .
C11 C 0.7446(12) 0.8295(8) 0.3082(6) 0.042(3) Uani 1 1 d . . .
C12 C 0.7017(15) 0.7709(10) 0.3593(6) 0.059(4) Uani 1 1 d . . .
H12 H 0.6939 0.7190 0.3567 0.071 Uiso 1 1 calc R . .
C13 C 0.6703(15) 0.7869(9) 0.4134(6) 0.058(4) Uani 1 1 d . . .
H13 H 0.6455 0.7450 0.4473 0.070 Uiso 1 1 calc R . .
C14 C 0.6746(16) 0.8639(10) 0.4187(7) 0.064(4) Uani 1 1 d . . .
H14 H 0.6479 0.8756 0.4551 0.076 Uiso 1 1 calc R . .
C15 C 0.7181(14) 0.9217(9) 0.3704(7) 0.057(4) Uani 1 1 d . . .
H15 H 0.7266 0.9730 0.3737 0.068 Uiso 1 1 calc R . .
C16 C 0.7514(13) 0.9054(8) 0.3142(7) 0.054(4) Uani 1 1 d . . .
H16 H 0.7783 0.9470 0.2807 0.065 Uiso 1 1 calc R . .
C21 C 0.7385(13) 0.6363(8) 0.2771(6) 0.040(3) Uani 1 1 d . . .
C22 C 0.9874(14) 0.6436(9) 0.3009(6) 0.052(4) Uani 1 1 d . . .
C31 C 1.0703(13) 0.6186(8) 0.1080(7) 0.052(4) Uani 1 1 d . . .
C32 C 1.1892(14) 0.7517(7) 0.0717(6) 0.041(3) Uani 1 1 d . . .
C33 C 1.1599(14) 0.6687(8) 0.1943(6) 0.052(4) Uani 1 1 d . . .
C41 C 0.6866(17) 0.8535(10) 0.0183(7) 0.064(4) Uani 1 1 d . . .
C42 C 0.9546(15) 0.8700(8) -0.0005(6) 0.049(4) Uani 1 1 d . . .
C43 C 0.7446(13) 0.9782(9) 0.0518(6) 0.049(4) Uani 1 1 d . . .
C51 C 1.0533(14) 0.8952(7) 0.1100(6) 0.041(3) Uani 1 1 d . . .
C52 C 0.8369(13) 0.9771(8) 0.1698(6) 0.042(3) Uani 1 1 d . . .
C53 C 1.0504(14) 0.8410(8) 0.2376(6) 0.047(4) Uani 1 1 d . . .
C61 C 0.6626(14) 0.6370(8) 0.1065(7) 0.051(4) Uani 1 1 d . . .
C62 C 0.6750(17) 0.6316(11) 0.0489(8) 0.086(6) Uani 1 1 d . . .
H62 H 0.7342 0.6614 0.0205 0.103 Uiso 1 1 calc R . .
C63 C 0.603(2) 0.5840(13) 0.0320(9) 0.104(7) Uani 1 1 d . . .
H63 H 0.6122 0.5821 -0.0077 0.125 Uiso 1 1 calc R . .
C64 C 0.519(2) 0.5390(11) 0.0741(10) 0.090(6) Uani 1 1 d . . .
H64 H 0.4735 0.5043 0.0628 0.108 Uiso 1 1 calc R . .
C65 C 0.4981(17) 0.5429(10) 0.1295(9) 0.076(5) Uani 1 1 d . . .
H65 H 0.4364 0.5134 0.1566 0.091 Uiso 1 1 calc R . .
C66 C 0.5707(14) 0.5921(8) 0.1474(7) 0.053(4) Uani 1 1 d . . .
H66 H 0.5576 0.5951 0.1868 0.063 Uiso 1 1 calc R . .
C71 C 0.2775(15) 0.3308(9) 0.1837(7) 0.062(4) Uani 1 1 d . . .
C72 C 0.2754(17) 0.1871(10) 0.1665(8) 0.076(5) Uani 1 1 d . . .
C81 C 0.4424(15) 0.0857(8) 0.3956(7) 0.051(4) Uani 1 1 d . . .
C82 C 0.3198(14) -0.0146(10) 0.3587(7) 0.062(4) Uani 1 1 d . . .
C83 C 0.4382(14) 0.1109(8) 0.2706(7) 0.048(4) Uani 1 1 d . . .
C91 C 0.0790(15) 0.2435(10) 0.4481(7) 0.061(4) Uani 1 1 d . . .
C92 C 0.1433(14) 0.0781(10) 0.4587(7) 0.060(4) Uani 1 1 d . . .
C93 C -0.1326(16) 0.1798(9) 0.4271(7) 0.063(4) Uani 1 1 d . . .
C101 C 0.0312(15) 0.0444(11) 0.3618(8) 0.076(5) Uani 1 1 d . . .
C102 C 0.0629(18) 0.0782(9) 0.2419(9) 0.076(5) Uani 1 1 d . . .
C103 C -0.1874(17) 0.1646(9) 0.3009(8) 0.066(5) Uani 1 1 d . . .
C110 C -0.0371(15) 0.4513(8) 0.2593(7) 0.057(4) Uani 1 1 d . . .
H110 H 0.0301 0.4833 0.2411 0.068 Uiso 1 1 calc R . .
C111 C -0.0508(14) 0.4223(8) 0.3229(8) 0.057(4) Uani 1 1 d . . .
H111 H 0.0096 0.4318 0.3470 0.068 Uiso 1 1 calc R . .
C112 C -0.1613(15) 0.3774(9) 0.3496(7) 0.060(4) Uani 1 1 d . . .
H112 H -0.1750 0.3590 0.3915 0.072 Uiso 1 1 calc R . .
C113 C -0.2473(13) 0.3616(8) 0.3132(8) 0.056(4) Uani 1 1 d . . .
H113 H -0.3176 0.3314 0.3301 0.067 Uiso 1 1 calc R . .
C114 C -0.2258(14) 0.3922(9) 0.2500(8) 0.063(5) Uani 1 1 d . . .
H114 H -0.2855 0.3840 0.2250 0.076 Uiso 1 1 calc R . .
C115 C -0.1187(16) 0.4342(9) 0.2239(7) 0.061(4) Uani 1 1 d . . .
H115 H -0.1028 0.4505 0.1820 0.073 Uiso 1 1 calc R . .
C121 C -0.0636(17) 0.2868(9) 0.1610(7) 0.060(4) Uani 1 1 d . . .
C122 C -0.0273(18) 0.3523(11) 0.1126(7) 0.078(5) Uani 1 1 d . . .
H122 H 0.0462 0.3759 0.1169 0.093 Uiso 1 1 calc R . .
C123 C -0.096(2) 0.3836(12) 0.0585(9) 0.103(7) Uani 1 1 d . . .
H123 H -0.0698 0.4277 0.0267 0.124 Uiso 1 1 calc R . .
C124 C -0.202(2) 0.3477(13) 0.0532(9) 0.097(7) Uani 1 1 d . . .
H124 H -0.2484 0.3670 0.0168 0.116 Uiso 1 1 calc R . .
C125 C -0.242(2) 0.2838(12) 0.1003(9) 0.091(6) Uani 1 1 d . . .
H125 H -0.3166 0.2610 0.0958 0.110 Uiso 1 1 calc R . .
C126 C -0.1736(17) 0.2536(9) 0.1536(7) 0.069(5) Uani 1 1 d . . .
H126 H -0.2014 0.2101 0.1853 0.082 Uiso 1 1 calc R . .
C131 C 0.3427(12) 0.3460(8) 0.3563(6) 0.042(3) Uani 1 1 d . . .
C132 C 0.4157(14) 0.3114(8) 0.4112(6) 0.052(4) Uani 1 1 d . . .
H132 H 0.4201 0.2555 0.4353 0.062 Uiso 1 1 calc R . .
C133 C 0.4815(15) 0.3654(11) 0.4277(7) 0.067(5) Uani 1 1 d . . .
H133 H 0.5306 0.3440 0.4635 0.081 Uiso 1 1 calc R . .
C134 C 0.4764(13) 0.4462(9) 0.3940(7) 0.058(4) Uani 1 1 d . . .
H134 H 0.5188 0.4805 0.4070 0.070 Uiso 1 1 calc R . .
C135 C 0.4079(15) 0.4776(9) 0.3401(7) 0.065(5) Uani 1 1 d . . .
H135 H 0.4043 0.5337 0.3165 0.078 Uiso 1 1 calc R . .
C136 C 0.3443(13) 0.4277(8) 0.3203(6) 0.047(4) Uani 1 1 d . . .
H136 H 0.3026 0.4491 0.2827 0.057 Uiso 1 1 calc R . .
C75S C 0.782(2) 0.5285(15) 0.4584(9) 0.129(9) Uani 1 1 d . . .
H75A H 0.8418 0.5209 0.4241 0.193 Uiso 1 1 calc R . .
H75B H 0.7997 0.5755 0.4683 0.193 Uiso 1 1 calc R . .
H75C H 0.6847 0.5397 0.4487 0.193 Uiso 1 1 calc R . .
C76S C 0.813(2) 0.4537(16) 0.5089(10) 0.126(9) Uani 1 1 d . . .
H76A H 0.7755 0.4664 0.5459 0.151 Uiso 1 1 calc R . .
H76B H 0.9155 0.4341 0.5121 0.151 Uiso 1 1 calc R . .
C78S C 0.780(2) 0.310(2) 0.5554(11) 0.175(14) Uani 1 1 d . . .
H78A H 0.7875 0.2612 0.5419 0.210 Uiso 1 1 calc R . .
H78B H 0.8688 0.3044 0.5734 0.210 Uiso 1 1 calc R . .
C79S C 0.671(2) 0.3131(13) 0.5980(11) 0.143(10) Uani 1 1 d . . .
H79A H 0.7058 0.3150 0.6343 0.215 Uiso 1 1 calc R . .
H79B H 0.6323 0.2635 0.6071 0.215 Uiso 1 1 calc R . .
H79C H 0.5981 0.3628 0.5822 0.215 Uiso 1 1 calc R . .
O1S O 0.7545(16) 0.3884(11) 0.5029(6) 0.134(6) Uani 1 1 d . . .

loop_
  _atom_site_aniso_label
  _atom_site_aniso_U_11
  _atom_site_aniso_U_22
  _atom_site_aniso_U_33
  _atom_site_aniso_U_23
  _atom_site_aniso_U_13
  _atom_site_aniso_U_12
Ru1 0.0208(5) 0.0354(6) 0.0443(6) -0.0135(5) -0.0028(4) -0.0057(4)
Ru2 0.0288(5) 0.0295(6) 0.0382(6) -0.0082(5) -0.0029(4) -0.0091(4)
Ru3 0.0254(5) 0.0330(6) 0.0449(6) -0.0118(5) -0.0003(5) -0.0057(4)
Ru4 0.0308(6) 0.0389(7) 0.0385(6) -0.0063(5) -0.0023(5) -0.0049(4)
Ru5 0.0239(5) 0.0286(6) 0.0435(6) -0.0092(5) -0.0007(4) -0.0084(4)
Ru6 0.0322(6) 0.0320(6) 0.0503(7) -0.0125(5) -0.0033(5) -0.0054(4)
Ru7 0.0400(6) 0.0377(7) 0.0504(7) -0.0157(6) 0.0007(5) -0.0081(5)
Ru8 0.0336(6) 0.0326(6) 0.0618(8) -0.0163(6) -0.0032(5) -0.0049(4)
Ru9 0.0354(6) 0.0408(7) 0.0490(7) -0.0090(6) -0.0010(5) -0.0102(5)
Ru10 0.0386(6) 0.0368(7) 0.0651(8) -0.0152(6) -0.0088(6) -0.0139(5)
Sn1 0.0290(5) 0.0385(5) 0.0460(6) -0.0169(4) -0.0032(4) -0.0113(4)
Sn2 0.0348(5) 0.0349(5) 0.0534(6) -0.0169(5) -0.0035(4) -0.0104(4)
O21 0.057(7) 0.056(7) 0.075(7) -0.009(6) -0.006(6) -0.033(5)
O22 0.057(7) 0.111(10) 0.061(7) -0.010(7) -0.021(6) -0.016(6)
O31 0.082(8) 0.054(7) 0.114(10) -0.042(7) 0.001(7) -0.015(6)
O32 0.033(6) 0.070(7) 0.082(8) -0.027(6) 0.031(5) -0.019(5)
O33 0.051(6) 0.095(9) 0.043(6) -0.005(6) -0.012(5) -0.005(6)
O41 0.063(8) 0.127(11) 0.069(8) -0.028(7) -0.027(6) -0.023(7)
O42 0.055(7) 0.102(9) 0.043(6) -0.005(6) 0.013(5) -0.006(6)
O43 0.061(7) 0.066(8) 0.085(8) -0.015(7) 0.013(6) -0.006(6)
O51 0.052(6) 0.049(6) 0.062(7) -0.008(5) 0.012(5) -0.019(5)
O52 0.068(7) 0.042(7) 0.093(8) -0.028(6) 0.007(6) -0.010(5)
O53 0.060(7) 0.105(9) 0.070(8) -0.027(7) -0.024(6) -0.023(6)
O71 0.130(12) 0.069(9) 0.134(12) 0.017(8) -0.004(9) -0.049(8)
O72 0.251(19) 0.153(14) 0.075(10) -0.086(10) 0.009(11) 0.021(12)
O81 0.069(8) 0.103(9) 0.100(9) -0.050(8) -0.041(7) 0.001(6)
O82 0.075(8) 0.043(7) 0.197(15) -0.031(9) 0.011(9) -0.020(6)
O83 0.050(7) 0.074(8) 0.105(9) -0.038(7) 0.018(6) -0.001(5)
O91 0.069(8) 0.115(11) 0.089(9) -0.056(8) -0.014(7) -0.005(7)
O92 0.058(7) 0.076(9) 0.094(9) 0.004(7) -0.001(7) -0.004(6)
O93 0.053(7) 0.076(8) 0.138(11) -0.025(8) 0.014(7) -0.018(6)
O101 0.071(8) 0.048(7) 0.095(9) 0.012(6) 0.004(6) -0.032(5)
O102 0.112(10) 0.084(10) 0.154(13) -0.077(9) -0.022(9) -0.015(7)
O103 0.045(7) 0.104(10) 0.149(12) -0.040(9) -0.001(8) -0.032(6)
C1 0.032(7) 0.030(7) 0.052(8) -0.010(6) -0.009(6) -0.014(5)
C2 0.054(9) 0.048(9) 0.048(8) -0.025(7) -0.017(7) 0.001(6)
C3 0.024(8) 0.076(13) 0.070(11) -0.009(10) -0.006(7) 0.009(7)
C4 0.016(7) 0.131(17) 0.121(16) -0.097(15) -0.032(9) 0.022(9)
C5 0.015(7) 0.039(9) 0.163(19) -0.037(11) -0.016(9) -0.006(6)
C6 0.030(8) 0.062(11) 0.059(10) -0.016(9) -0.003(7) -0.010(7)
C7 0.018(7) 0.093(14) 0.090(14) -0.055(12) 0.001(8) 0.011(8)
C8 0.044(9) 0.044(9) 0.069(11) -0.006(9) -0.003(8) 0.002(7)
C11 0.036(7) 0.045(9) 0.048(9) -0.022(7) -0.003(6) -0.004(6)
C12 0.068(11) 0.067(11) 0.044(9) -0.019(8) 0.007(8) -0.019(8)
C13 0.089(12) 0.043(9) 0.041(9) -0.006(7) 0.005(8) -0.025(8)
C14 0.079(12) 0.069(12) 0.043(9) -0.023(9) -0.005(8) -0.008(9)
C15 0.055(9) 0.062(11) 0.066(11) -0.040(9) -0.002(8) -0.008(7)
C16 0.046(9) 0.042(9) 0.072(11) -0.017(8) 0.013(7) -0.013(6)
C21 0.032(7) 0.034(8) 0.058(9) -0.013(7) -0.003(6) -0.014(6)
C22 0.054(9) 0.066(10) 0.027(8) -0.007(7) 0.007(7) -0.014(7)
C31 0.042(8) 0.034(8) 0.077(11) -0.010(8) 0.012(7) -0.019(6)
C32 0.054(9) 0.030(8) 0.034(8) -0.006(6) -0.002(7) -0.004(6)
C33 0.052(9) 0.040(9) 0.047(9) 0.000(7) -0.002(7) 0.005(7)
C41 0.067(11) 0.076(12) 0.044(9) -0.023(9) 0.001(8) 0.000(8)
C42 0.054(9) 0.039(9) 0.049(9) -0.008(7) -0.012(8) -0.007(6)
C43 0.029(7) 0.051(10) 0.064(10) -0.009(8) 0.006(7) -0.018(6)
C51 0.063(10) 0.026(7) 0.033(8) -0.006(6) -0.001(7) -0.010(6)
C52 0.045(8) 0.041(9) 0.037(8) -0.005(7) 0.002(6) -0.015(6)
C53 0.054(9) 0.038(8) 0.041(8) -0.013(7) 0.007(7) 0.001(6)
C61 0.042(8) 0.040(9) 0.083(11) -0.032(8) -0.013(8) -0.006(6)
C62 0.085(13) 0.122(16) 0.100(14) -0.078(13) 0.002(11) -0.054(11)
C63 0.14(2) 0.121(19) 0.080(15) -0.054(14) -0.005(14) -0.049(15)
C64 0.093(15) 0.074(14) 0.128(19) -0.046(14) -0.023(14) -0.037(10)
C65 0.067(11) 0.074(12) 0.108(15) -0.037(12) 0.000(11) -0.045(9)
C66 0.046(9) 0.045(9) 0.079(11) -0.032(8) 0.001(8) -0.017(7)
C71 0.056(10) 0.041(10) 0.074(12) -0.005(9) 0.009(8) -0.006(7)
C72 0.082(12) 0.054(11) 0.073(12) -0.015(9) -0.004(10) 0.014(8)
C81 0.055(9) 0.047(9) 0.057(10) -0.022(8) -0.003(8) -0.015(7)
C82 0.050(9) 0.056(11) 0.080(12) -0.023(10) 0.001(8) -0.011(7)
C83 0.040(8) 0.044(9) 0.070(10) -0.027(8) -0.007(7) -0.009(6)
C91 0.050(9) 0.069(12) 0.066(11) -0.028(9) 0.002(8) -0.011(8)
C92 0.041(9) 0.061(11) 0.073(11) -0.007(9) -0.001(8) -0.024(7)
C93 0.054(10) 0.068(11) 0.051(10) -0.003(8) 0.012(8) -0.010(8)
C101 0.047(10) 0.070(13) 0.105(15) -0.008(11) -0.018(10) -0.020(8)
C102 0.097(13) 0.041(10) 0.109(15) -0.034(10) -0.028(11) -0.023(8)
C103 0.058(10) 0.042(9) 0.096(13) -0.011(9) 0.012(10) -0.026(7)
C110 0.060(10) 0.028(8) 0.076(12) -0.008(8) 0.002(9) -0.010(6)
C111 0.041(9) 0.037(9) 0.100(14) -0.031(9) -0.018(9) 0.001(6)
C112 0.051(10) 0.063(11) 0.050(9) -0.015(8) -0.012(8) 0.016(8)
C113 0.030(8) 0.038(9) 0.094(13) -0.020(9) -0.007(8) 0.005(6)
C114 0.032(8) 0.047(10) 0.095(13) -0.008(9) -0.041(9) 0.019(7)
C115 0.065(11) 0.044(10) 0.072(11) -0.025(8) 0.008(9) -0.006(7)
C121 0.075(12) 0.051(10) 0.055(10) -0.020(8) -0.022(9) 0.000(8)
C122 0.089(13) 0.079(13) 0.053(11) -0.001(10) -0.018(10) -0.019(10)
C123 0.127(18) 0.096(16) 0.097(16) -0.023(12) -0.065(14) -0.028(12)
C124 0.119(18) 0.092(16) 0.075(14) -0.023(12) -0.042(13) 0.000(13)
C125 0.112(16) 0.081(15) 0.095(15) -0.033(12) -0.053(14) -0.018(12)
C126 0.085(13) 0.053(11) 0.068(11) -0.015(9) -0.013(10) -0.013(8)
C131 0.029(7) 0.048(9) 0.057(9) -0.026(7) 0.007(6) -0.013(6)
C132 0.057(9) 0.039(9) 0.055(9) -0.009(7) -0.006(8) -0.009(7)
C133 0.055(10) 0.078(13) 0.081(12) -0.029(10) -0.017(9) -0.023(8)
C134 0.033(8) 0.051(10) 0.102(13) -0.040(10) 0.001(8) -0.009(7)
C135 0.071(11) 0.033(9) 0.090(12) 0.003(8) -0.041(10) -0.020(7)
C136 0.042(8) 0.051(9) 0.049(9) -0.011(8) -0.011(7) -0.011(6)
C75S 0.14(2) 0.17(2) 0.068(14) -0.017(15) 0.002(14) -0.051(17)
C76S 0.107(18) 0.21(3) 0.097(18) -0.057(19) -0.009(15) -0.079(18)
C78S 0.070(17) 0.30(4) 0.11(2) -0.03(2) 0.018(15) -0.01(2)
C79S 0.11(2) 0.11(2) 0.18(3) 0.001(18) -0.055(19) -0.026(15)
O1S 0.133(13) 0.179(16) 0.091(11) 0.003(11) -0.046(10) -0.082(11)

_geom_special_details
;
  All esds (except the esd in the dihedral angle between two l.s. planes)
  are estimated using the full covariance matrix.  The cell esds are taken
  into account individually in the estimation of esds in distances, angles
  and torsion angles; correlations between esds in cell parameters are only
  used when they are defined by crystal symmetry.  An approximate (isotropic)
  treatment of cell esds is used for estimating esds involving l.s. planes.
;

loop_
  _geom_bond_atom_site_label_1
  _geom_bond_atom_site_label_2
  _geom_bond_distance
  _geom_bond_site_symmetry_2
  _geom_bond_publ_flag
Ru1 C1 2.078(11) . ?
Ru1 C6 2.216(14) . ?
Ru1 C7 2.229(12) . ?
Ru1 C5 2.230(13) . ?
Ru1 C4 2.259(13) . ?
Ru1 C8 2.264(12) . ?
Ru1 C3 2.278(13) . ?
Ru1 Sn1 2.6836(12) . ?
Ru1 Ru5 2.7381(13) . ?
Ru1 Ru2 2.7965(13) . ?
Ru1 Ru4 2.8958(15) . ?
Ru2 C21 1.829(13) . ?
Ru2 C22 1.880(14) . ?
Ru2 C1 1.958(11) . ?
Ru2 Sn1 2.6006(13) . ?
Ru2 Ru5 2.7941(14) . ?
Ru2 Ru3 2.8725(15) . ?
Ru3 C31 1.844(14) . ?
Ru3 C33 1.860(14) . ?
Ru3 C32 1.894(14) . ?
Ru3 Sn1 2.6453(13) . ?
Ru3 Ru4 2.9456(13) . ?
Ru3 Ru5 2.9619(13) . ?
Ru4 C41 1.866(17) . ?
Ru4 C43 1.875(14) . ?
Ru4 C42 1.906(15) . ?
Ru4 Sn1 2.6711(14) . ?
Ru4 Ru5 2.8090(14) . ?
Ru5 C51 1.913(14) . ?
Ru5 C52 1.916(13) . ?
Ru5 C53 1.930(14) . ?
Ru5 C1 2.178(13) . ?
Ru6 C2 2.079(12) . ?
Ru6 C115 2.213(14) . ?
Ru6 C110 2.233(13) . ?
Ru6 C111 2.236(13) . ?
Ru6 C114 2.239(11) . ?
Ru6 C112 2.254(13) . ?
Ru6 C113 2.262(12) . ?
Ru6 Sn2 2.6583(13) . ?
Ru6 Ru10 2.7268(15) . ?
Ru6 Ru7 2.8140(14) . ?
Ru6 Ru9 2.9120(15) . ?
Ru7 C71 1.826(16) . ?
Ru7 C72 1.881(17) . ?
Ru7 C2 2.017(13) . ?
Ru7 Sn2 2.6119(14) . ?
Ru7 Ru10 2.7906(17) . ?
Ru7 Ru8 2.8294(16) . ?
Ru8 C81 1.879(14) . ?
Ru8 C83 1.885(15) . ?
Ru8 C82 1.896(16) . ?
Ru8 Sn2 2.6518(13) . ?
Ru8 Ru9 2.9283(15) . ?
Ru8 Ru10 2.9514(14) . ?
Ru9 C92 1.835(16) . ?
Ru9 C91 1.853(17) . ?
Ru9 C93 1.908(16) . ?
Ru9 Sn2 2.6775(15) . ?
Ru9 Ru10 2.7939(16) . ?
Ru10 C101 1.883(18) . ?
Ru10 C102 1.915(17) . ?
Ru10 C103 1.928(16) . ?
Ru10 C2 2.131(14) . ?
Sn1 C61 2.101(13) . ?
Sn2 C131 2.125(12) . ?
O21 C21 1.150(14) . ?
O22 C22 1.128(14) . ?
O31 C31 1.155(14) . ?
O32 C32 1.138(14) . ?
O33 C33 1.169(14) . ?
O41 C41 1.142(16) . ?
O42 C42 1.119(15) . ?
O43 C43 1.160(14) . ?
O51 C51 1.165(14) . ?
O52 C52 1.144(13) . ?
O53 C53 1.124(14) . ?
O71 C71 1.168(17) . ?
O72 C72 1.130(17) . ?
O81 C81 1.128(14) . ?
O82 C82 1.155(16) . ?
O83 C83 1.156(15) . ?
O91 C91 1.129(16) . ?
O92 C92 1.158(15) . ?
O93 C93 1.125(16) . ?
O101 C101 1.184(17) . ?
O102 C102 1.123(17) . ?
O103 C103 1.109(15) . ?
C1 C11 1.480(16) . ?
C2 C121 1.474(17) . ?
C3 C8 1.38(2) . ?
C3 C4 1.43(2) . ?
C4 C5 1.45(2) . ?
C5 C6 1.374(19) . ?
C6 C7 1.35(2) . ?
C7 C8 1.361(19) . ?
C11 C16 1.366(17) . ?
C11 C12 1.381(18) . ?
C12 C13 1.365(17) . ?
C13 C14 1.371(18) . ?
C14 C15 1.339(19) . ?
C15 C16 1.415(18) . ?
C61 C62 1.366(19) . ?
C61 C66 1.398(18) . ?
C62 C63 1.36(2) . ?
C63 C64 1.37(2) . ?
C64 C65 1.31(2) . ?
C65 C66 1.401(18) . ?
C110 C115 1.346(19) . ?
C110 C111 1.403(19) . ?
C111 C112 1.44(2) . ?
C112 C113 1.382(18) . ?
C113 C114 1.40(2) . ?
C114 C115 1.38(2) . ?
C121 C126 1.38(2) . ?
C121 C122 1.39(2) . ?
C122 C123 1.38(2) . ?
C123 C124 1.36(3) . ?
C124 C125 1.37(2) . ?
C125 C126 1.362(19) . ?
C131 C136 1.377(17) . ?
C131 C132 1.413(17) . ?
C132 C133 1.407(18) . ?
C133 C134 1.339(19) . ?
C134 C135 1.373(18) . ?
C135 C136 1.377(17) . ?
C75S C76S 1.42(2) . ?
C76S O1S 1.42(2) . ?
C78S C79S 1.37(3) . ?
C78S O1S 1.48(3) . ?

loop_
  _geom_angle_atom_site_label_1
  _geom_angle_atom_site_label_2
  _geom_angle_atom_site_label_3
  _geom_angle
  _geom_angle_site_symmetry_1
  _geom_angle_site_symmetry_3
  _geom_angle_publ_flag
C1 Ru1 C6 87.9(5) . . ?
C1 Ru1 C7 89.5(5) . . ?
C6 Ru1 C7 35.3(5) . . ?
C1 Ru1 C5 112.7(6) . . ?
C6 Ru1 C5 36.0(5) . . ?
C7 Ru1 C5 64.5(6) . . ?
C1 Ru1 C4 150.5(7) . . ?
C6 Ru1 C4 65.5(6) . . ?
C7 Ru1 C4 76.3(5) . . ?
C5 Ru1 C4 37.8(6) . . ?
C1 Ru1 C8 116.0(5) . . ?
C6 Ru1 C8 63.8(5) . . ?
C7 Ru1 C8 35.3(5) . . ?
C5 Ru1 C8 76.9(5) . . ?
C4 Ru1 C8 64.8(6) . . ?
C1 Ru1 C3 151.2(6) . . ?
C6 Ru1 C3 76.1(5) . . ?
C7 Ru1 C3 63.6(5) . . ?
C5 Ru1 C3 66.4(6) . . ?
C4 Ru1 C3 36.7(6) . . ?
C8 Ru1 C3 35.3(5) . . ?
C1 Ru1 Sn1 100.3(3) . . ?
C6 Ru1 Sn1 127.4(4) . . ?
C7 Ru1 Sn1 160.4(4) . . ?
C5 Ru1 Sn1 95.9(4) . . ?
C4 Ru1 Sn1 87.2(4) . . ?
C8 Ru1 Sn1 143.1(4) . . ?
C3 Ru1 Sn1 108.5(5) . . ?
C1 Ru1 Ru5 51.6(3) . . ?
C6 Ru1 Ru5 134.4(4) . . ?
C7 Ru1 Ru5 114.3(4) . . ?
C5 Ru1 Ru5 163.9(5) . . ?
C4 Ru1 Ru5 157.9(6) . . ?
C8 Ru1 Ru5 111.8(4) . . ?
C3 Ru1 Ru5 128.5(4) . . ?
Sn1 Ru1 Ru5 84.91(4) . . ?
C1 Ru1 Ru2 44.4(3) . . ?
C6 Ru1 Ru2 107.2(4) . . ?
C7 Ru1 Ru2 128.0(4) . . ?
C5 Ru1 Ru2 106.6(4) . . ?
C4 Ru1 Ru2 129.6(5) . . ?
C8 Ru1 Ru2 160.2(4) . . ?
C3 Ru1 Ru2 163.8(5) . . ?
Sn1 Ru1 Ru2 56.61(3) . . ?
Ru5 Ru1 Ru2 60.63(3) . . ?
C1 Ru1 Ru4 109.3(3) . . ?
C6 Ru1 Ru4 161.8(3) . . ?
C7 Ru1 Ru4 135.3(5) . . ?
C5 Ru1 Ru4 133.5(5) . . ?
C4 Ru1 Ru4 98.8(5) . . ?
C8 Ru1 Ru4 102.0(4) . . ?
C3 Ru1 Ru4 85.8(4) . . ?
Sn1 Ru1 Ru4 57.05(3) . . ?
Ru5 Ru1 Ru4 59.73(4) . . ?
Ru2 Ru1 Ru4 89.74(4) . . ?
C21 Ru2 C22 88.2(6) . . ?
C21 Ru2 C1 102.1(5) . . ?
C22 Ru2 C1 103.7(5) . . ?
C21 Ru2 Sn1 90.3(4) . . ?
C22 Ru2 Sn1 149.3(4) . . ?
C1 Ru2 Sn1 106.6(3) . . ?
C21 Ru2 Ru5 149.3(4) . . ?
C22 Ru2 Ru5 110.5(5) . . ?
C1 Ru2 Ru5 50.9(4) . . ?
Sn1 Ru2 Ru5 85.37(4) . . ?
C21 Ru2 Ru1 93.1(4) . . ?
C22 Ru2 Ru1 151.2(4) . . ?
C1 Ru2 Ru1 47.9(3) . . ?
Sn1 Ru2 Ru1 59.50(3) . . ?
Ru5 Ru2 Ru1 58.65(3) . . ?
C21 Ru2 Ru3 137.0(4) . . ?
C22 Ru2 Ru3 105.3(4) . . ?
C1 Ru2 Ru3 113.5(4) . . ?
Sn1 Ru2 Ru3 57.55(3) . . ?
Ru5 Ru2 Ru3 63.01(4) . . ?
Ru1 Ru2 Ru3 93.23(4) . . ?
C31 Ru3 C33 94.7(6) . . ?
C31 Ru3 C32 90.2(5) . . ?
C33 Ru3 C32 94.7(6) . . ?
C31 Ru3 Sn1 83.2(4) . . ?
C33 Ru3 Sn1 123.9(4) . . ?
C32 Ru3 Sn1 141.1(4) . . ?
C31 Ru3 Ru2 108.6(4) . . ?
C33 Ru3 Ru2 72.4(4) . . ?
C32 Ru3 Ru2 157.6(4) . . ?
Sn1 Ru3 Ru2 56.06(3) . . ?
C31 Ru3 Ru4 118.0(4) . . ?
C33 Ru3 Ru4 146.0(4) . . ?
C32 Ru3 Ru4 94.4(3) . . ?
Sn1 Ru3 Ru4 56.77(3) . . ?
Ru2 Ru3 Ru4 87.31(4) . . ?
C31 Ru3 Ru5 163.4(4) . . ?
C33 Ru3 Ru5 89.2(4) . . ?
C32 Ru3 Ru5 105.6(4) . . ?
Sn1 Ru3 Ru5 81.28(3) . . ?
Ru2 Ru3 Ru5 57.20(3) . . ?
Ru4 Ru3 Ru5 56.78(3) . . ?
C41 Ru4 C43 92.0(6) . . ?
C41 Ru4 C42 89.7(6) . . ?
C43 Ru4 C42 98.4(6) . . ?
C41 Ru4 Sn1 81.1(5) . . ?
C43 Ru4 Sn1 141.1(4) . . ?
C42 Ru4 Sn1 119.7(4) . . ?
C41 Ru4 Ru5 154.3(5) . . ?
C43 Ru4 Ru5 86.8(4) . . ?
C42 Ru4 Ru5 115.9(4) . . ?
Sn1 Ru4 Ru5 83.77(4) . . ?
C41 Ru4 Ru1 97.0(5) . . ?
C43 Ru4 Ru1 85.8(4) . . ?
C42 Ru4 Ru1 172.0(4) . . ?
Sn1 Ru4 Ru1 57.47(3) . . ?
Ru5 Ru4 Ru1 57.34(3) . . ?
C41 Ru4 Ru3 123.1(5) . . ?
C43 Ru4 Ru3 144.8(4) . . ?
C42 Ru4 Ru3 82.9(4) . . ?
Sn1 Ru4 Ru3 55.94(3) . . ?
Ru5 Ru4 Ru3 61.90(3) . . ?
Ru1 Ru4 Ru3 89.71(4) . . ?
C51 Ru5 C52 91.7(5) . . ?
C51 Ru5 C53 94.0(5) . . ?
C52 Ru5 C53 96.3(5) . . ?
C51 Ru5 C1 174.2(4) . . ?
C52 Ru5 C1 94.0(5) . . ?
C53 Ru5 C1 84.5(5) . . ?
C51 Ru5 Ru1 133.0(4) . . ?
C52 Ru5 Ru1 87.5(4) . . ?
C53 Ru5 Ru1 132.8(4) . . ?
C1 Ru5 Ru1 48.4(3) . . ?
C51 Ru5 Ru2 130.2(3) . . ?
C52 Ru5 Ru2 137.7(4) . . ?
C53 Ru5 Ru2 87.7(4) . . ?
C1 Ru5 Ru2 44.3(3) . . ?
Ru1 Ru5 Ru2 60.72(3) . . ?
C51 Ru5 Ru4 70.7(4) . . ?
C52 Ru5 Ru4 98.2(4) . . ?
C53 Ru5 Ru4 159.2(3) . . ?
C1 Ru5 Ru4 109.3(3) . . ?
Ru1 Ru5 Ru4 62.92(4) . . ?
Ru2 Ru5 Ru4 91.60(4) . . ?
C51 Ru5 Ru3 71.1(3) . . ?
C52 Ru5 Ru3 156.3(4) . . ?
C53 Ru5 Ru3 100.9(3) . . ?
C1 Ru5 Ru3 103.7(3) . . ?
Ru1 Ru5 Ru3 92.49(4) . . ?
Ru2 Ru5 Ru3 59.79(3) . . ?
Ru4 Ru5 Ru3 61.32(3) . . ?
C2 Ru6 C115 89.4(5) . . ?
C2 Ru6 C110 116.1(6) . . ?
C115 Ru6 C110 35.3(5) . . ?
C2 Ru6 C111 152.7(6) . . ?
C115 Ru6 C111 65.4(5) . . ?
C110 Ru6 C111 36.6(5) . . ?
C2 Ru6 C114 89.3(5) . . ?
C115 Ru6 C114 36.1(5) . . ?
C110 Ru6 C114 63.6(5) . . ?
C111 Ru6 C114 76.6(5) . . ?
C2 Ru6 C112 150.3(5) . . ?
C115 Ru6 C112 77.2(5) . . ?
C110 Ru6 C112 65.6(5) . . ?
C111 Ru6 C112 37.3(5) . . ?
C114 Ru6 C112 64.3(5) . . ?
C2 Ru6 C113 114.7(5) . . ?
C115 Ru6 C113 65.8(5) . . ?
C110 Ru6 C113 76.7(5) . . ?
C111 Ru6 C113 65.9(5) . . ?
C114 Ru6 C113 36.3(5) . . ?
C112 Ru6 C113 35.6(5) . . ?
C2 Ru6 Sn2 101.7(3) . . ?
C115 Ru6 Sn2 127.1(4) . . ?
C110 Ru6 Sn2 97.1(4) . . ?
C111 Ru6 Sn2 86.7(3) . . ?
C114 Ru6 Sn2 160.6(4) . . ?
C112 Ru6 Sn2 107.5(4) . . ?
C113 Ru6 Sn2 142.1(4) . . ?
C2 Ru6 Ru10 50.5(4) . . ?
C115 Ru6 Ru10 135.2(4) . . ?
C110 Ru6 Ru10 166.5(4) . . ?
C111 Ru6 Ru10 156.8(4) . . ?
C114 Ru6 Ru10 113.7(4) . . ?
C112 Ru6 Ru10 126.4(4) . . ?
C113 Ru6 Ru10 109.3(4) . . ?
Sn2 Ru6 Ru10 85.45(4) . . ?
C2 Ru6 Ru7 45.7(3) . . ?
C115 Ru6 Ru7 108.4(4) . . ?
C110 Ru6 Ru7 109.9(4) . . ?
C111 Ru6 Ru7 130.5(4) . . ?
C114 Ru6 Ru7 128.9(5) . . ?
C112 Ru6 Ru7 164.0(4) . . ?
C113 Ru6 Ru7 160.4(4) . . ?
Sn2 Ru6 Ru7 56.93(4) . . ?
Ru10 Ru6 Ru7 60.46(4) . . ?
C2 Ru6 Ru9 108.1(4) . . ?
C115 Ru6 Ru9 161.2(4) . . ?
C110 Ru6 Ru9 132.8(4) . . ?
C111 Ru6 Ru9 98.3(4) . . ?
C114 Ru6 Ru9 134.3(5) . . ?
C112 Ru6 Ru9 84.1(3) . . ?
C113 Ru6 Ru9 99.6(4) . . ?
Sn2 Ru6 Ru9 57.24(4) . . ?
Ru10 Ru6 Ru9 59.29(4) . . ?
Ru7 Ru6 Ru9 89.19(4) . . ?
C71 Ru7 C72 89.9(7) . . ?
C71 Ru7 C2 107.7(6) . . ?
C72 Ru7 C2 96.7(6) . . ?
C71 Ru7 Sn2 91.6(5) . . ?
C72 Ru7 Sn2 156.5(5) . . ?
C2 Ru7 Sn2 105.1(3) . . ?
C71 Ru7 Ru10 154.3(4) . . ?
C72 Ru7 Ru10 103.2(6) . . ?
C2 Ru7 Ru10 49.5(4) . . ?
Sn2 Ru7 Ru10 85.05(5) . . ?
C71 Ru7 Ru6 98.5(4) . . ?
C72 Ru7 Ru6 144.2(5) . . ?
C2 Ru7 Ru6 47.5(3) . . ?
Sn2 Ru7 Ru6 58.53(4) . . ?
Ru10 Ru7 Ru6 58.22(4) . . ?
C71 Ru7 Ru8 134.6(5) . . ?
C72 Ru7 Ru8 105.5(4) . . ?
C2 Ru7 Ru8 112.4(4) . . ?
Sn2 Ru7 Ru8 58.17(4) . . ?
Ru10 Ru7 Ru8 63.35(4) . . ?
Ru6 Ru7 Ru8 93.11(5) . . ?
C81 Ru8 C83 96.4(6) . . ?
C81 Ru8 C82 91.2(6) . . ?
C83 Ru8 C82 96.2(6) . . ?
C81 Ru8 Sn2 88.9(4) . . ?
C83 Ru8 Sn2 98.3(4) . . ?
C82 Ru8 Sn2 165.4(4) . . ?
C81 Ru8 Ru7 134.5(4) . . ?
C83 Ru8 Ru7 64.4(4) . . ?
C82 Ru8 Ru7 129.7(5) . . ?
Sn2 Ru8 Ru7 56.81(4) . . ?
C81 Ru8 Ru9 96.9(4) . . ?
C83 Ru8 Ru9 151.6(4) . . ?
C82 Ru8 Ru9 108.4(4) . . ?
Sn2 Ru8 Ru9 57.09(4) . . ?
Ru7 Ru8 Ru9 88.57(4) . . ?
C81 Ru8 Ru10 153.0(4) . . ?
C83 Ru8 Ru10 109.8(4) . . ?
C82 Ru8 Ru10 92.3(4) . . ?
Sn2 Ru8 Ru10 81.21(4) . . ?
Ru7 Ru8 Ru10 57.68(4) . . ?
Ru9 Ru8 Ru10 56.74(4) . . ?
C92 Ru9 C91 93.2(7) . . ?
C92 Ru9 C93 99.1(6) . . ?
C91 Ru9 C93 91.9(7) . . ?
C92 Ru9 Sn2 115.7(4) . . ?
C91 Ru9 Sn2 79.9(5) . . ?
C93 Ru9 Sn2 144.4(4) . . ?
C92 Ru9 Ru10 110.4(5) . . ?
C91 Ru9 Ru10 155.5(5) . . ?
C93 Ru9 Ru10 90.8(5) . . ?
Sn2 Ru9 Ru10 83.77(5) . . ?
C92 Ru9 Ru6 164.1(5) . . ?
C91 Ru9 Ru6 98.6(5) . . ?
C93 Ru9 Ru6 91.2(4) . . ?
Sn2 Ru9 Ru6 56.61(4) . . ?
Ru10 Ru9 Ru6 57.05(4) . . ?
C92 Ru9 Ru8 75.7(5) . . ?
C91 Ru9 Ru8 120.7(5) . . ?
C93 Ru9 Ru8 147.0(5) . . ?
Sn2 Ru9 Ru8 56.25(4) . . ?
Ru10 Ru9 Ru8 62.05(4) . . ?
Ru6 Ru9 Ru8 89.10(4) . . ?
C101 Ru10 C102 88.9(7) . . ?
C101 Ru10 C103 91.2(6) . . ?
C102 Ru10 C103 101.5(7) . . ?
C101 Ru10 C2 177.6(6) . . ?
C102 Ru10 C2 89.1(6) . . ?
C103 Ru10 C2 90.5(6) . . ?
C101 Ru10 Ru6 133.0(5) . . ?
C102 Ru10 Ru6 137.6(5) . . ?
C103 Ru10 Ru6 86.1(4) . . ?
C2 Ru10 Ru6 48.8(3) . . ?
C101 Ru10 Ru7 132.5(4) . . ?
C102 Ru10 Ru7 86.9(5) . . ?
C103 Ru10 Ru7 135.9(4) . . ?
C2 Ru10 Ru7 46.0(3) . . ?
Ru6 Ru10 Ru7 61.32(4) . . ?
C101 Ru10 Ru9 70.6(5) . . ?
C102 Ru10 Ru9 151.0(5) . . ?
C103 Ru10 Ru9 99.3(5) . . ?
C2 Ru10 Ru9 110.8(3) . . ?
Ru6 Ru10 Ru9 63.66(4) . . ?
Ru7 Ru10 Ru9 92.11(4) . . ?
C101 Ru10 Ru8 74.2(4) . . ?
C102 Ru10 Ru8 94.2(5) . . ?
C103 Ru10 Ru8 158.5(5) . . ?
C2 Ru10 Ru8 104.6(4) . . ?
Ru6 Ru10 Ru8 92.28(4) . . ?
Ru7 Ru10 Ru8 58.96(4) . . ?
Ru9 Ru10 Ru8 61.21(4) . . ?
C61 Sn1 Ru2 133.8(4) . . ?
C61 Sn1 Ru3 133.7(4) . . ?
Ru2 Sn1 Ru3 66.39(4) . . ?
C61 Sn1 Ru4 126.3(4) . . ?
Ru2 Sn1 Ru4 99.26(4) . . ?
Ru3 Sn1 Ru4 67.29(4) . . ?
C61 Sn1 Ru1 124.9(3) . . ?
Ru2 Sn1 Ru1 63.88(3) . . ?
Ru3 Sn1 Ru1 101.28(4) . . ?
Ru4 Sn1 Ru1 65.48(4) . . ?
C131 Sn2 Ru7 136.4(4) . . ?
C131 Sn2 Ru8 133.7(3) . . ?
Ru7 Sn2 Ru8 65.03(4) . . ?
C131 Sn2 Ru6 125.0(3) . . ?
Ru7 Sn2 Ru6 64.54(4) . . ?
Ru8 Sn2 Ru6 100.99(4) . . ?
C131 Sn2 Ru9 124.3(4) . . ?
Ru7 Sn2 Ru9 98.96(5) . . ?
Ru8 Sn2 Ru9 66.66(4) . . ?
Ru6 Sn2 Ru9 66.15(4) . . ?
C11 C1 Ru2 129.6(9) . . ?
C11 C1 Ru1 128.6(8) . . ?
Ru2 C1 Ru1 87.7(5) . . ?
C11 C1 Ru5 129.4(9) . . ?
Ru2 C1 Ru5 84.8(5) . . ?
Ru1 C1 Ru5 80.1(4) . . ?
C121 C2 Ru7 125.6(11) . . ?
C121 C2 Ru6 129.6(9) . . ?
Ru7 C2 Ru6 86.8(5) . . ?
C121 C2 Ru10 133.2(11) . . ?
Ru7 C2 Ru10 84.5(4) . . ?
Ru6 C2 Ru10 80.7(5) . . ?
C8 C3 C4 119.6(15) . . ?
C8 C3 Ru1 71.8(8) . . ?
C4 C3 Ru1 70.9(7) . . ?
C3 C4 C5 118.1(14) . . ?
C3 C4 Ru1 72.4(8) . . ?
C5 C4 Ru1 70.0(7) . . ?
C6 C5 C4 118.0(14) . . ?
C6 C5 Ru1 71.5(8) . . ?
C4 C5 Ru1 72.2(9) . . ?
C7 C6 C5 122.0(15) . . ?
C7 C6 Ru1 72.9(8) . . ?
C5 C6 Ru1 72.5(8) . . ?
C6 C7 C8 121.9(15) . . ?
C6 C7 Ru1 71.9(8) . . ?
C8 C7 Ru1 73.8(8) . . ?
C7 C8 C3 120.4(16) . . ?
C7 C8 Ru1 70.9(8) . . ?
C3 C8 Ru1 72.9(8) . . ?
C16 C11 C12 116.6(13) . . ?
C16 C11 C1 122.6(13) . . ?
C12 C11 C1 120.8(12) . . ?
C13 C12 C11 121.9(14) . . ?
C12 C13 C14 121.1(14) . . ?
C15 C14 C13 118.5(14) . . ?
C14 C15 C16 120.6(14) . . ?
C11 C16 C15 121.1(14) . . ?
O21 C21 Ru2 178.2(12) . . ?
O22 C22 Ru2 175.5(12) . . ?
O31 C31 Ru3 176.3(12) . . ?
O32 C32 Ru3 173.9(11) . . ?
O33 C33 Ru3 168.7(12) . . ?
O41 C41 Ru4 175.5(13) . . ?
O42 C42 Ru4 174.5(12) . . ?
O43 C43 Ru4 176.9(13) . . ?
O51 C51 Ru5 162.8(11) . . ?
O52 C52 Ru5 177.4(12) . . ?
O53 C53 Ru5 179.8(16) . . ?
C62 C61 C66 116.9(13) . . ?
C62 C61 Sn1 122.2(12) . . ?
C66 C61 Sn1 120.9(11) . . ?
C63 C62 C61 121.9(19) . . ?
C62 C63 C64 119.0(19) . . ?
C65 C64 C63 122.6(18) . . ?
C64 C65 C66 118.8(18) . . ?
C61 C66 C65 120.7(15) . . ?
O71 C71 Ru7 178.1(15) . . ?
O72 C72 Ru7 173.4(18) . . ?
O81 C81 Ru8 176.9(13) . . ?
O82 C82 Ru8 175.0(14) . . ?
O83 C83 Ru8 163.0(12) . . ?
O91 C91 Ru9 178.5(15) . . ?
O92 C92 Ru9 175.5(14) . . ?
O93 C93 Ru9 179.0(16) . . ?
O101 C101 Ru10 167.5(13) . . ?
O102 C102 Ru10 176.3(17) . . ?
O103 C103 Ru10 175.7(15) . . ?
C115 C110 C111 121.9(15) . . ?
C115 C110 Ru6 71.6(8) . . ?
C111 C110 Ru6 71.8(8) . . ?
C110 C111 C112 117.7(14) . . ?
C110 C111 Ru6 71.6(8) . . ?
C112 C111 Ru6 72.0(8) . . ?
C113 C112 C111 120.4(14) . . ?
C113 C112 Ru6 72.5(8) . . ?
C111 C112 Ru6 70.7(8) . . ?
C112 C113 C114 118.2(15) . . ?
C112 C113 Ru6 71.9(8) . . ?
C114 C113 Ru6 70.9(7) . . ?
C115 C114 C113 121.9(15) . . ?
C115 C114 Ru6 70.9(8) . . ?
C113 C114 Ru6 72.7(7) . . ?
C110 C115 C114 119.7(16) . . ?
C110 C115 Ru6 73.2(8) . . ?
C114 C115 Ru6 73.0(8) . . ?
C126 C121 C122 117.5(14) . . ?
C126 C121 C2 120.8(16) . . ?
C122 C121 C2 121.7(15) . . ?
C123 C122 C121 122.6(18) . . ?
C124 C123 C122 118(2) . . ?
C123 C124 C125 121.5(18) . . ?
C126 C125 C124 120.2(18) . . ?
C125 C126 C121 120.6(17) . . ?
C136 C131 C132 119.9(12) . . ?
C136 C131 Sn2 122.0(10) . . ?
C132 C131 Sn2 118.0(10) . . ?
C133 C132 C131 116.9(14) . . ?
C134 C133 C132 122.9(15) . . ?
C133 C134 C135 119.0(14) . . ?
C134 C135 C136 121.2(14) . . ?
C131 C136 C135 119.9(13) . . ?
C75S C76S O1S 111.3(19) . . ?
C79S C78S O1S 110(2) . . ?
C76S O1S C78S 113.2(18) . . ?

_diffrn_measured_fraction_theta_max    0.995
_diffrn_reflns_theta_full              25.09
_diffrn_measured_fraction_theta_full   0.995
_refine_diff_density_max    1.080
_refine_diff_density_min   -1.090
_refine_diff_density_rms    0.156

#===END
